# Supplementary material for: Aspiration risk in relation to Glasgow Coma Scale score and clinical parameters in patients with severe acute alcohol intoxication: a single-centre, retrospective study
Source: PubMed Central journal article supplement — BMJ Open. 2021 Oct 1;11(10):e053619. doi: 10.1136/bmjopen-2021-053619 (PMC8488741; doi:10.1136/bmjopen-2021-053619), 2021-10-01
Supplement: bmjopen-2021-053619.draft_revisions.pdf [file bmjopen-2021-053619.draft_revisions.pdf]

# BMJ Open

BMJ Open is committed to open peer review. As part of this commitment we make the peer review history of every article we publish publicly available.

When an article is published we post the peer reviewers' comments and the authors' responses online. We also post the versions of the paper that were used during peer review. These are the versions that the peer review comments apply to.

The versions of the paper that follow are the versions that were submitted during the peer review process. They are not the versions of record or the final published versions. They should not be cited or distributed as the published version of this manuscript.

BMJ Open is an open access journal and the full, final, typeset and author-corrected version of record of the manuscript is available on our site with no access controls, subscription charges or pay-per-view fees (<http://bmjopen.bmj.com>).

If you have any questions on BMJ Open's open peer review process please email [info.bmjopen@bmj.com](mailto:info.bmjopen@bmj.com)

# BMJ Open

## Glasgow Coma Scale predicts aspiration risk in acute alcohol intoxication

|                               |                                                                                                                                                                                                                                                                                                                                                                                                                                                                                                                                   |
|-------------------------------|-----------------------------------------------------------------------------------------------------------------------------------------------------------------------------------------------------------------------------------------------------------------------------------------------------------------------------------------------------------------------------------------------------------------------------------------------------------------------------------------------------------------------------------|
| Journal:                      | <i>BMJ Open</i>                                                                                                                                                                                                                                                                                                                                                                                                                                                                                                                   |
| Manuscript ID                 | bmjopen-2021-053619                                                                                                                                                                                                                                                                                                                                                                                                                                                                                                               |
| Article Type:                 | Original research                                                                                                                                                                                                                                                                                                                                                                                                                                                                                                                 |
| Date Submitted by the Author: | 20-May-2021                                                                                                                                                                                                                                                                                                                                                                                                                                                                                                                       |
| Complete List of Authors:     | Conzelmann, Michael; BASF Corporate Health Management, Dept. of Human Toxicology; Rudolf Boehm Institute of Pharmacology and Toxicology, Postgraduate Study "Toxicology and Environmental Toxicology"<br>Hoidis, Anne; University Hospital Heidelberg, Dept. of Gastroenterology<br>Bruckner, Thomas; Heidelberg University Hospital, Institute for Medical Biometry and Informatics<br>Popp, Erik; University Hospital Heidelberg, Dept. of Anaesthesiology<br>Koschny, Ronald; University Hospital Heidelberg, Gastroenterology |
| Keywords:                     | Adult intensive & critical care < ANAESTHETICS, Substance misuse < PSYCHIATRY, TOXICOLOGY                                                                                                                                                                                                                                                                                                                                                                                                                                         |
|                               |                                                                                                                                                                                                                                                                                                                                                                                                                                                                                                                                   |

SCHOLARONE™  
Manuscripts

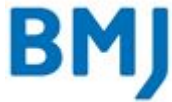

I, the Submitting Author has the right to grant and does grant on behalf of all authors of the Work (as defined in the below author licence), an exclusive licence and/or a non-exclusive licence for contributions from authors who are: i) UK Crown employees; ii) where BMJ has agreed a CC-BY licence shall apply, and/or iii) in accordance with the terms applicable for US Federal Government officers or employees acting as part of their official duties; on a worldwide, perpetual, irrevocable, royalty-free basis to BMJ Publishing Group Ltd ("BMJ") its licensees and where the relevant Journal is co-owned by BMJ to the co-owners of the Journal, to publish the Work in this journal and any other BMJ products and to exploit all rights, as set out in our [licence](#).

The Submitting Author accepts and understands that any supply made under these terms is made by BMJ to the Submitting Author unless you are acting as an employee on behalf of your employer or a postgraduate student of an affiliated institution which is paying any applicable article publishing charge ("APC") for Open Access articles. Where the Submitting Author wishes to make the Work available on an Open Access basis (and intends to pay the relevant APC), the terms of reuse of such Open Access shall be governed by a Creative Commons licence – details of these licences and which [Creative Commons](#) licence will apply to this Work are set out in our licence referred to above.

Other than as permitted in any relevant BMJ Author's Self Archiving Policies, I confirm this Work has not been accepted for publication elsewhere, is not being considered for publication elsewhere and does not duplicate material already published. I confirm all authors consent to publication of this Work and authorise the granting of this licence.

## Glasgow Coma Scale predicts aspiration risk in acute alcohol intoxication

Michael Conzelmann <sup>1,2</sup>, Anne Hoidis <sup>3</sup>, Thomas Bruckner <sup>4</sup>, Erik Popp <sup>5</sup>, Ronald Koschny <sup>3</sup>

<sup>1</sup> Dept. of Human Toxicology, BASF Corporate Health Management, Carl-Bosch-Str. 38, D-67056 Ludwigshafen, Germany

<sup>2</sup> Postgraduate Study "Toxicology and Environmental Toxicology", Rudolf Boehm Institute of Pharmacology and Toxicology, University of Leipzig, Haertelstrasse 16-18, 04107 Leipzig, Germany.

<sup>3</sup> Dept. of Gastroenterology, University Hospital Heidelberg, INF 410, D-69120 Heidelberg, Germany

<sup>4</sup> Institute for Medical Biometry and Informatics, Heidelberg University Hospital, INF 130.3, D-69120 Heidelberg, Germany

<sup>5</sup> Dept. of Anaesthesiology, University Hospital Heidelberg, INF 420, D-69120 Heidelberg, Germany

✉ Corresponding author Prof. Dr. med. Ronald Koschny  
⊗ Present address Dept. of Internal Medicine  
Im Neuenheimer Feld 410  
D-69120 Heidelberg, Germany  
Email: ronald.koschny@med.uni-heidelberg.de  
Tel.: +49 6221 5637969, Fax: +49 6221 565255

**Abbreviated title:** Aspiration risk in Severe Acute Ethanol Intoxication

**Key words:** alcohol intoxication, airway management, aspiration, intubation, Glasgow Coma Scale, protective airway reflex

## Abstract

**Objectives** In patients with acute alcohol intoxication the decision for or against airway protection by endotracheal intubation can be challenging. It is often based on the Glasgow Coma Scale (GCS), although the GCS has not been validated for non-traumatic intoxicated patients. Data on risk factors for aspiration in alcohol monointoxication are scarce. This study aimed to analyze the aspiration risk in relation to the GCS and clinical parameters in patients with severe acute alcohol monointoxication.

**Setting** In this monocentric, retrospective study, we analyzed alcoholized patients admitted to a german intensive care unit between 2006 and 2020.

**Participants** n=458 admissions with acute alcohol intoxication were identified. A total of n=411 admissions between the age of 15 and 75 years were eligible for our analysis. n=47 admissions were excluded due to missing data or severe interfering medical conditions.

**Primary and secondary outcome measures** The following data were extracted from the medical records: age, gender, admission time, blood alcohol level, blood glucose level, initial outpatient (prehospital) Glasgow Coma Scale (1<sup>st</sup> GCS), GCS at admission to the hospital (2<sup>nd</sup> GCS), initial vital signs (systolic blood pressure, heart rate, breathing rate, peripheral capillary oxygen saturation (SpO<sub>2</sub>)), clinical and prehospital signs of aspiration and airway management measures.

**Results** The mean age at admission was 35 years and 72% of the patients were male. The mean blood alcohol level was 2.7 g/l  $\pm$ 1.0 with a maximum of 5.9 g/l. The blood alcohol level did not correlate with the GCS but with the age of the patient. In univariate analysis, the aspiration risk correlated with blood alcohol level, age, GCS, oxygen saturation, respiratory rate, and blood glucose level and was significantly higher in male patients, upon vomiting, and in patients requiring airway measures, especially secretion suction (54% aspiration rate) and intubation (55% aspiration rate). Aspiration rate was 45.4% in patients without vs. 5.8% in patients with preserved protective reflexes. In multivariate analysis, only age and GCS

1  
2  
3 were significantly associated with the risk of aspiration. However, the positive predictive  
4 value of GCS=3 for aspiration was only 16%.  
5  
6

7 **Conclusion** Although the aspiration rate in alcohol monointoxicated patients correlates with  
8 GCS and protective reflexes, the decision for endotracheal intubation should be based on  
9 the presence of different risk factors for aspiration.  
10  
11  
12  
13  
14  
15  
16  
17

### 18 **Strengths and limitations of this study**

- 19 • Analysis of the so far largest cohort of alcohol monointoxicated patients for risk  
20 factors of aspiration.  
21
- 22 • GCS does not correlate with the blood alcohol level. The aspiration risk correlates  
23 with GCS and age in a multivariate analysis.  
24
- 25 • Identification of further risk factors which indicate aspiration and could guide clinical  
26 diagnostic and therapeutic work up.  
27
- 28 • Due to the retrospective nature of the study, we cannot provide direct clinical  
29 recommendations.  
30
- 31 • Since we focused on severely alcohol-intoxicated patients admitted to an intensive  
32 care unit, data might not be extrapolated to a general emergency department.  
33  
34  
35  
36  
37  
38  
39  
40  
41  
42  
43  
44  
45  
46  
47  
48  
49  
50  
51  
52  
53  
54  
55  
56  
57  
58  
59  
60

## Introduction

Patients with acute ethanol intoxication frequently require medical treatment, observation and diagnostics by paramedics, emergency physicians, emergency departments as well as intensive care units (ICU) [1]. Up to 12% of the attendances at the emergency department of an inner-city hospital in the United Kingdom were alcohol-related, mostly due to acute intoxication [2]. In Ontario, Canada, 5.1% of visits to the emergency department were attributable to alcohol use [3]. Besides respiratory depression, an elevated risk of aspiration due to impaired consciousness after alcohol consumption can cause life-threatening complications [4, 5]. In trauma patients with impaired consciousness, a GCS of 8 or less is widely accepted as indication for an airway protection by endotracheal intubation [6]. Although alcohol intoxicated patients often present with impaired consciousness and a GCS of less than 8 the reported intubation rate is low (0-2.3%) [7-9], maybe because the clinical benefit of intubating intoxicated patients with a  $GCS \leq 8$  in order to prevent aspiration is still controversially discussed [8-12]. Differences of aspiration and intubation rates between mixed intoxications and alcohol monointoxications suggest, that these clinical conditions might not be comparable regarding the necessity of airway protection. In contrast to mixed intoxication, data regarding airway hazard in acute alcohol monointoxication are very scarce. The aim of this study was to analyze the aspiration risk in adolescent and adult atraumatic patients who required admission to our intensive care unit due to severe acute alcohol monointoxication. We hypothesized that aspiration is a rather rare event in this group of patients. We analyzed the blood alcohol level and the consciousness status according to the GCS in correlation with a clinically suspected or proven aspiration to identify risk factors for aspiration.

## Material and Methods

### Study Design and Population

For this retrospective study, all patients who had been admitted to the intensive and intermediate care unit of the Department of Gastroenterology at the University Hospital of Heidelberg between January 2006 and December 2020 were screened for acute mono-intoxication with alcohol (ethanol). The study was approved by the local ethics board of Heidelberg University (S-329/2013). Mixed intoxication was assumed when reported by the patient or relatives or in case of indicative prehospital scenarios (empty blisters, visible injection signs) or positive toxicology screening upon admission to the hospital (see "Measurements"). These patients were excluded from the study. Ethanol intoxication was defined as impaired consciousness due to a blood alcohol level  $\geq 0.8$  g/l, which is the legal definition for alcohol intoxication in many states [13]. Patients with missing data regarding blood alcohol level or GCS were excluded, as well as patients with severe comorbidities or medical conditions interfering with consciousness, airway situation, aspiration risk or breathing rate. Details of excluded patients are given in Figure 1. Deep therapeutic sedation was defined as sedation by the emergency physician resulting in an iatrogenic  $GCS \leq 8$ . Severe hypothermia was defined by a core temperature  $\leq 34^{\circ}C$ . Hypoglycemia was defined as any blood glucose level  $< 65$  mg/dl as the lower level of normal regarding our standard point-of-care-testing (POCT) devices. Concomitant use of common medication at therapeutic doses was permitted. The following data were extracted from the medical records: age, gender, admission time, blood alcohol level, blood glucose level, initial outpatient (prehospital) Glasgow Coma Scale (1<sup>st</sup> GCS), GCS at admission to the hospital (2<sup>nd</sup> GCS), initial vital signs (systolic blood pressure, heart rate, breathing rate, peripheral capillary oxygen saturation ( $SpO_2$ )), clinical and prehospital signs of aspiration and airway management measures. When patients were prehospitally intubated, only the first GCS before intubation was recorded, since the second GCS was narcosis-induced (usually  $GCS=3$ ). Aspiration was rated positive if proven by bronchoscopy or if clinical suspicion was



1  
2  
3 supported by at least one of the following factors: coughing up aspirate, coarse crackles on  
4 auscultation, new opacities on chest x-ray, development of fever or laboratory signs of  
5 inflammation (CRP, leukocytosis) without other overt reasons. Patients without clinical signs  
6 of aspiration or normal bronchoscopy were rated negative.  
7  
8  
9  
10

## 11 12 13 14 **Measurements**

15  
16  
17 Except for prehospital measurements of blood glucose levels by point-of-care-testing  
18 (POCT) according to the emergency medical service (EMS), blood samples were obtained  
19 immediately after the patient's admission to our hospital for venous blood gas analysis  
20 (RAPIDLab 1200, Siemens Healthcare Diagnostics, Eschborn, Germany), measurement of  
21 blood alcohol level and standard laboratory tests including glucose. When indicated by the  
22 patient's history or clinical data, a qualitative urine toxicology screen (Triage 8 Drugs of  
23 Abuse Panel, Alere Diagnostics, Cologne, Germany) was performed to exclude mixed  
24 intoxications. This test detects the following components: amphetamine, barbiturates,  
25 benzodiazepines, cocaine, methadone, opiates, tetrahydrocannabinol (THC), and tricyclic  
26 antidepressants. Due to the low specificity, sensitivity and clinical benefit, urine toxicology  
27 test was not performed on a regular basis [14].  
28  
29  
30  
31  
32  
33  
34  
35  
36  
37  
38  
39  
40  
41  
42  
43  
44  
45

## 46 **Statistical Analysis**

47 Data entry was performed with help of Microsoft Excel (Version 14.0), for the statistical  
48 analysis SAS Version 9.4 WIN (SAS Institute GmbH, Heidelberg, Germany) was used. The  
49 empirical distribution of continuous data was described with mean, standard deviation and  
50 range, in case of categorical data with absolute and relative frequencies. Spearman's  
51 correlation coefficient was calculated to describe associations between blood alcohol level  
52 and laboratory values. Possible differences between patients with and without aspiration  
53  
54  
55  
56  
57  
58  
59  
60

1  
2  
3 were tested with t-test for continuous data and chi-square-tests for categorical data. Binary  
4  
5 multivariable logistic regression analysis was used to find possible risk factors for aspiration.  
6  
7 Statistical graphics were used to visualize the findings.  
8  
9

### 10 **Patient and Public Involvement**

11  
12

13 No patient involved.  
14  
15  
16  
17  
18  
19  
20  
21  
22  
23  
24  
25  
26  
27  
28  
29  
30  
31  
32  
33  
34  
35  
36  
37  
38  
39  
40  
41  
42  
43  
44  
45  
46  
47  
48  
49  
50  
51  
52  
53  
54  
55  
56  
57  
58  
59  
60

For peer review only

## Results

A total of n=411 admissions to our intermediate and intensive care unit for acute alcohol monointoxication comprising n=327 different patients were eligible for our analysis. Patient's age ranged between 15 and 74 years. The baseline characteristics of the enrolled patients and their vital parameters are listed in Table 1.

**Table 1** Baseline characteristics of the study population at admission

|                                                                                             |                         |
|---------------------------------------------------------------------------------------------|-------------------------|
| <b>Total number of admissions</b>                                                           | 411                     |
| <b>Number of different patients</b>                                                         | 327                     |
| <b>Patients with more than 1 admission</b>                                                  | 33                      |
| Patients with 2 admissions                                                                  | 21                      |
| Patients with 3 admissions                                                                  | 7                       |
| Patients with 4 admissions                                                                  | 4                       |
| Patients with 5 admissions                                                                  | 1                       |
| <b>Gender, males/females (%)</b>                                                            | 294/117 (72%/28%)       |
| <b>Age, mean <math>\pm</math>SD], (range) [y]</b>                                           | 35 $\pm$ 15 (15-74)     |
| <b>Blood alcohol level, mean <math>\pm</math>SD, (range) [g/l]</b>                          | 2.7 $\pm$ 1.0 (0.9-5.9) |
| <b>Peripheral oxygen saturation (SpO<sub>2</sub>), mean <math>\pm</math>SD, (range) [%]</b> | 96 $\pm$ 6 (47-100)     |
| <b>Heart rate, mean <math>\pm</math>SD (range) [bpm]</b>                                    | 92 $\pm$ 20 (35-180)    |
| <b>Systolic blood pressure, mean <math>\pm</math>SD (range) [mmHg]</b>                      | 121 $\pm$ 22 (70-200)   |
| <b>Respiratory rate, mean <math>\pm</math>SD] (range) [1/min]</b>                           | 15 $\pm$ 5 (0-35)       |

Figure 2A shows the age distribution for male and female admissions. Most patients (72%) were male. The mean age at admission was 35 years without a significant difference between male and female patients ( $p=0.122$ ) with a mean age of 36 years ( $\pm 14$  years, range 15-74) for male and 33 years ( $\pm 15$  years, range 15-74) for female patients.

1  
2  
3 The mean blood alcohol level of all patients admitted to our intensive care unit was 2.7 g/l  
4  $\pm 1.01$  with a maximum of 5.89 g/l. The distribution of the blood alcohol level is depicted in  
5 Figure 2B. The mean alcohol level did not significantly differ between male ( $2.7 \pm 0.95$  g/l) and  
6 female ( $2.5 \pm 1.14$  g/l) patients ( $p=0.132$ ). The maximum blood alcohol level was 5.89 g/l and  
7 5.85 g/l in male and female patients, respectively. In Figure 2C, the blood alcohol levels are  
8 shown according to age and gender. The blood alcohol level strongly correlated with  
9 patient's age ( $r=0.43$ ,  $p<0.0001$ ) in the total population, as well as in male ( $r=0.46$ ,  
10  $p<0.0001$ ) and female patients ( $r=0.33$ ,  $p=0.003$ ).

11  
12  
13  
14  
15  
16  
17  
18  
19  
20  
21 In order to analyze the fluctuating consciousness in acute alcohol intoxication, we compared  
22 the first GCS of the patient upon arrival of the emergency team with the second GCS at  
23 admission of the patient to the hospital approximately 30-60 minutes later. Prehospital  
24 intubated patients (iatrogenic GCS=3 at hospital admission) were excluded from this  
25 analysis, resulting in a population of  $n=329$  eligible patients with available data regarding first  
26 and second GCS. The median GCS improved from 10 to 13 between prehospital  
27 presentation and admission to the ICU. Figure 3 visualizes the strong correlation between  
28 the first and second GCS ( $r=0.77$ ,  $p<0.0001$ ). Dots on the diagonal line correspond to  
29 patients with identical first and second GCS. We considered a change of  $\pm 3$  GCS points  
30 ( $\Delta GCS$ ) as clinically relevant. Most patients ( $n=258$ , 78.5%) did not show a relevant change  
31 of GCS ( $-2 \leq \Delta GCS \leq +2$ ). While  $n=61$  (18.5%) demonstrated an improvement of their  
32 consciousness level during their transport to the hospital ( $\Delta GCS \geq +3$ ), only  $n=10$  (3.0%)  
33 patients showed a relevant deterioration ( $\Delta GCS \leq -3$ ).

34  
35  
36  
37  
38  
39  
40  
41  
42  
43  
44  
45  
46  
47  
48  
49  
50 To rule out any bias due to mixed GCS records (i.e. pooled first and second GCS), all  
51 following analyses regarding GCS were performed with the first GCS only. The median first  
52 GCS did not differ between male and female patients (10 vs. 10,  $p=0.864$ ). Blood alcohol  
53 levels did neither correlate with the initial GCS in the general population ( $r=-0.05$ ,  $p=0.279$ ),  
54 nor for male ( $r=-0.05$ ,  $p=0.331$ ) or female ( $r=-0.04$ ,  $p=0.673$ ) patients. Nevertheless, very  
55  
56  
57  
58  
59  
60

1  
2  
3 high blood alcohol levels (>5 g/l) were measured only in patients with a first GCS ≤11  
4  
5 (Figure 4). The highest blood alcohol levels of 5.89 and 5.85 g/l were found in 2 patients with  
6  
7 a GCS of 3 and 8, respectively.  
8  
9

10 Within the total population of n=411 patients, aspiration was found in n=21 (5.1%). Aspiration  
11  
12 was diagnosed by a positive bronchoscopy in n=5 (24%) of these patients. In the remaining  
13  
14 n=16 patients, diagnosis of aspiration was based on the presence of at least one of the  
15  
16 following criteria: coarse crackles on auscultation (n=9), new opacities on chest x-ray (n=6),  
17  
18 development of fever or laboratory signs of inflammation (CRP elevation, leukocytosis)  
19  
20 without overt alternative reasons (n=6). In order to identify risk factors for aspiration in  
21  
22 alcohol intoxicated patients, we compared the cohorts with and without aspiration regarding  
23  
24 demographic characteristics, vital signs, blood alcohol level, blood glucose level and airway  
25  
26 management. In univariate analysis of continuous risk factors for aspiration, patients with  
27  
28 aspiration were significantly older (mean age 47.4 vs. 34.6 years), had a higher blood  
29  
30 alcohol level (mean 3.4 versus 2.6 g/l), a lower first GCS (median 3 vs. 11), a lower  
31  
32 peripheral oxygen saturation (SpO<sub>2</sub>, mean 90 vs 96%), and a lower respiration rate (mean  
33  
34 13/min vs. 15/min) (Table 2).  
35  
36  
37  
38  
39  
40  
41  
42  
43  
44  
45  
46  
47  
48  
49  
50  
51  
52  
53  
54  
55  
56  
57  
58  
59  
60

**Table 2** Univariate analysis of continuous risk factors for aspiration

| <b>Parameter</b>                      | <b>Patients w/o aspiration</b><br>Mean $\pm$ SD (range) | <b>Evaluable</b><br><b>patients</b> | <b>Patients with aspiration</b><br>Mean $\pm$ SD (range) | <b>Evaluable</b><br><b>patients</b> | <b>p-value</b> |
|---------------------------------------|---------------------------------------------------------|-------------------------------------|----------------------------------------------------------|-------------------------------------|----------------|
| <b>Age [y]</b>                        | 34.6 $\pm$ 14.5 (15-74)                                 | 390                                 | 47.4 $\pm$ 9.3 (32-65)                                   | 21                                  | <0.0001        |
| <b>Blood alcohol level [g/l]</b>      | 2.6 $\pm$ 1.0 (0.9-5.9)                                 | 390                                 | 3.4 $\pm$ 1.3 (1.7-5.5)                                  | 21                                  | 0.017          |
| <b>Initial GCS</b>                    | 11 (median) $\pm$ 4 (3-15)                              | 378                                 | 3 (median) $\pm$ 2 (3-9)                                 | 20                                  | <0.0001        |
| <b>SpO<sub>2</sub> [%]</b>            | 96 $\pm$ 6 (47-100)                                     | 365                                 | 90 $\pm$ 8 (73-100)                                      | 21                                  | 0.006          |
| <b>Systolic blood pressure [mmHg]</b> | 121 $\pm$ 22 (70-200)                                   | 371                                 | 122 $\pm$ 20 (96-160)                                    | 21                                  | 0.772          |
| <b>Heart rate [bpm]</b>               | 92 $\pm$ 20 (35-180)                                    | 377                                 | 89 $\pm$ 20 (50-120)                                     | 21                                  | 0.580          |
| <b>Respiratory rate [1/min]</b>       | 15 $\pm$ 5 (0-35)                                       | 302                                 | 13 $\pm$ 3 (8-18)                                        | 19                                  | 0.014          |
| <b>Blood glucose level [mg/dl]</b>    | 109 $\pm$ 40 (65-487)                                   | 388                                 | 139 $\pm$ 60 (72-335)                                    | 21                                  | 0.028          |

1  
2  
3 Furthermore, univariate results of binary risk factors revealed a significantly higher risk for  
4 aspiration for male patients, patients with documented vomiting as well as for the necessity  
5 of secretion suction, oxygen supply, Guedel tube application and mask ventilation, although  
6 the last two measures were rarely applied (n=10) (Table 3).  
7  
8  
9  
10  
11  
12  
13  
14  
15  
16  
17  
18  
19  
20  
21  
22  
23  
24  
25  
26  
27  
28  
29  
30  
31  
32  
33  
34  
35  
36  
37  
38  
39  
40  
41  
42  
43  
44  
45  
46  
47  
48  
49  
50  
51  
52  
53  
54  
55  
56  
57  
58  
59  
60

For peer review only

**Table 3** Univariate analysis of binary risk factors for aspiration

| Parameter                                                     | Manifestation | Patients w/o aspiration [%] | Patients with aspiration [%] | Evaluable patients | p-value |
|---------------------------------------------------------------|---------------|-----------------------------|------------------------------|--------------------|---------|
| <b>Gender</b>                                                 | Male          | 93.5                        | 6.5                          | 294                | 0.048   |
|                                                               | Female        | 98.3                        | 1.7                          | 117                |         |
| <b>Vomiting</b>                                               | No            | 96.4                        | 3.7                          | 329                | 0.017   |
|                                                               | Yes           | 89.9                        | 10.1                         | 79                 |         |
| <b>Oxygen supply</b>                                          | No            | 99.2                        | 0.8                          | 265                | <0.0001 |
|                                                               | Yes           | 86.9                        | 13.1                         | 145                |         |
| <b>Guedel tube application</b>                                | No            | 95.5                        | 4.5                          | 400                | 0.0003  |
|                                                               | Yes           | 70.0                        | 30.0                         | 10                 |         |
| <b>Mask ventilation</b>                                       | No            | 95.8                        | 4.2                          | 400                | <0.0001 |
|                                                               | Yes           | 60.0                        | 40.0                         | 10                 |         |
| <b>Protective airway reflexes (at GCS <math>\leq</math>8)</b> | No            | 54.6                        | 45.4                         | 22                 | 0.0001  |
|                                                               | Yes           | 94.2                        | 5.8                          | 52                 |         |
| <b>Secretion suction</b>                                      | No            | 96.5                        | 3.5                          | 396                | <0.0001 |
|                                                               | Yes           | 46.1                        | 53.9                         | 13                 |         |
| <b>Intubation</b>                                             | No            | 98.4                        | 1.6                          | 384                | <0.0001 |
|                                                               | Yes           | 44.4                        | 55.6                         | 27                 |         |



Intubated patients showed a significantly higher aspiration rate than patient's without intubation (56% vs. 1.6%). Since many emergency physicians base their decision for protective intubation in patients with a GCS $\leq$ 8 on the presence or absence of the swallowing and gag reflex, the presence of these protective reflexes was correlated with the risk of aspiration. A total of n=152 patients had a first GCS $\leq$ 8. Data regarding protective reflexes were available in n=74 (48.7%) of these patients. Protective reflexes in patients with GCS $\leq$ 8 were present in n=52 (70.3%), but absent in n=22 (29.7%). The absence of protective reflexes was significantly associated with a higher risk of aspiration: 45.4% aspiration rate in patients without vs. 5.8% in patients with protective reflexes (p=0.0001, Table 3).

Some of these factors are interdependent: low oxygen saturation (<92%) will imply oxygen supply, vomiting will imply secretion suction, oxygen saturation inversely correlates with age. On multivariate analysis of the risk factors gender, age, blood alcohol level, first GCS, and oxygen saturation, only age (OR 1.06) and GCS (OR 0.71) significantly correlated with the risk of aspiration (Table 4).

**Table 4** Odds ratio estimates in multivariate analysis of risk factors for aspiration.

| Risk factor                 | OR   | 95% confidence limits |       | p-value |
|-----------------------------|------|-----------------------|-------|---------|
| Gender (male versus female) | 3.29 | 0.67                  | 16.03 | 0.141   |
| Age                         | 1.06 | 1.02                  | 1.10  | 0.005   |
| Blood alcohol level         | 1.26 | 0.80                  | 2.00  | 0.320   |
| First GCS                   | 0.71 | 0.60                  | 0.84  | <0.0001 |
| Oxygen saturation           | 0.98 | 0.93                  | 1.03  | 0.397   |

Due to the low number of complete data sets, presence of protective reflexes could not be included in the multivariate analysis. The difference of age and GCS between aspirated and non-aspirated patients is visualized in Figure 5A & B. The respective box plot analysis is

1  
2  
3 shown in Figure 5C & D. However, GCS=3 had a low sensitivity (60%) and a moderate  
4 specificity (83%) for aspiration, with a positive predictive value (PPV) of only 16% and very  
5 high negative predictive value (NPV) of 98%.  
6  
7  
8  
9  
10  
11  
12  
13  
14  
15  
16  
17  
18  
19  
20  
21  
22  
23  
24  
25  
26  
27  
28  
29  
30  
31  
32  
33  
34  
35  
36  
37  
38  
39  
40  
41  
42  
43  
44  
45  
46  
47  
48  
49  
50  
51  
52  
53  
54  
55  
56  
57  
58  
59  
60

For peer review only

## Discussion

Acute alcohol intoxication constitutes a frequent medical problem with a considerable socio-economic and health care system burden. The demographic analysis of our cohort shows a predominance of young male patients (72%, mean age 35 years), which is comparable to other demographic studies [15, 16]. However, our ICU cohort showed a younger age distribution than another retrospectively analyzed cohort of patients admitted to an emergency department [1]. With a mean alcohol level of 2.7 g/l, our cohort showed higher blood alcohol levels than many other studies [17-20], which might be due to the selection of ICU patients. In contrast to Vereslt et al. [1], a higher age was associated with a higher blood alcohol level in our cohort. Figures 2A & C impressively illustrate the clinical relevance of acute alcohol intoxication as an important differential diagnosis in unconscious elderly patients.

Since the prehospital care of alcoholized patients comprises a rather short period, one would expect – if at all – a deterioration of the GCS between the first patient contact and the admission to the hospital due to an ongoing alcohol resorption in the alimentary tract. However, 19% of our patients showed an improvement of more than 2 GCS points during their prehospital care, but only 3% of patients showed a relevant deterioration. Overall, we found a strong correlation between the first and second GCS. The GCS of head injured trauma patients with additional alcohol intoxication (blood alcohol level >0.8g/l) also improved between prehospital care and the emergency department [21]. This implies that the measurement time point of GCS during the prehospital care should be exactly defined and pooling GCS data from different phases of care should be avoided. Slight changes in GCS might not necessarily reflect a clinically relevant change of consciousness level of alcoholized patients. We, therefore, considered only an arbitrarily defined  $\Delta$ GCS of  $\geq 3$  as clinically relevant.

1  
2  
3 Most data on the influence of alcohol on the GCS were derived from trauma patients. Some  
4 studies showed a correlation between blood alcohol level and GCS [22], while others did not  
5 [23-25]. Interestingly, data on a correlation between blood alcohol level and GCS in alcohol-  
6 intoxicated patients without concomitant trauma are very scarce and the clinical  
7 consequence of low GCS values is unclear. In a cohort of alcohol-intoxicated patients  
8 without trauma from the Oktoberfest in Munich the blood alcohol level was not predictive for  
9 the need of hospitalization [26]. Concordantly, in our study on non-traumatic alcoholized  
10 patients, the blood alcohol level did not correlate with the GCS, even at a considerably high  
11 mean blood alcohol level of 2.7 g/l. Nevertheless, n=8 patients of our cohort with an  
12 extremely high blood alcohol level of  $\geq 5$  g/l demonstrated a reduced median GCS of 5. This  
13 cohort, however, was too small for a subgroup analysis. In contrast, in adolescent patients  
14 (13-17 years of age) with rather mild alcohol intoxication (mean 1.6g/l) Mick et al. found a  
15 significant correlation between the blood alcohol level and the GCS (mean GCS 12.2) [17].  
16 One might speculate that adolescents and younger adults have not yet undergone  
17 habituation to regular alcohol consumption. However, even in the youngest subgroup (15-25  
18 years) of our study, there was no significant correlation between blood alcohol level and  
19 GCS (n=136 patients, mean blood alcohol level 2.1 g/l, median GCS 10, p=0.061).

20  
21  
22  
23  
24  
25  
26  
27  
28  
29  
30  
31  
32  
33  
34  
35  
36  
37  
38  
39  
40 One of the most challenging clinical problems in unconscious alcohol-intoxicated patients is  
41 the decision for or against airway protection by intubation. Many studies were performed in  
42 heterogeneous cohorts of mixed intoxication [7, 9, 27-29], in trauma patients [8, 30] or  
43 without any data on the risk of aspiration [8, 27]. While some authors and recommendations  
44 refer to a  $GCS \leq 8$  as an indication for intubation in alcohol intoxicated patients, the  
45 association of a low GCS with a higher risk of aspiration has not been sufficiently  
46 substantiated in these patients. In their prospective observational study, Duncan et al. did  
47 not find a higher rate of aspiration in patients with a  $GCS \leq 8$  [7]. However, only n=22 of 73  
48 patients had alcohol monointoxication and only n=12 patients of the entire cohort  
49 demonstrated a  $GCS \leq 8$ . Comparing n=12 intubated (mean GCS 5.9) with n=14 not-

1  
2  
3 intubated (mean GCS 5.5) patients with mixed intoxication, Donald et al. did not detect a  
4 difference in laboratory or physiological parameters. However, the aspiration rate was not  
5 analyzed [9]. None of the intubated patients had an alcohol intoxication. In patients with a  
6 mixed intoxication, the risk of aspiration pneumonia did not significantly differ ( $p=0.48$ )  
7 between patients with  $GCS \leq 8$  versus  $GCS > 8$  [11]. In another prospective study on  $n=224$   
8 drug-intoxicated patients, there was no correlation between the GCS and the risk of  
9 aspiration [29]. A  $GCS \leq 8$  was not considered as essential for an increased risk of aspiration.  
10 However, the aspiration rate in that drug-intoxicated cohort was very high (29%) compared  
11 to our study (5%). This indicates that mixed intoxication and alcohol monointoxication might  
12 not be comparable regarding the risk of aspiration.  
13  
14

15  
16 In our study on non-traumatic alcohol-monointoxicated patients, we found a strong  
17 correlation between the GCS and the risk of aspiration, even in a multivariate regression  
18 model. However,  $n=133$  of the 152 patients (87.5%) with  $GCS \leq 8$  did not aspirate. Thus,  
19 even for a  $GCS=3$  the PPV is too low (16%) to guide the decision for intubation. However,  
20 Sauter et al. described that a  $GCS \leq 8$  was the main reason for emergency teams to decide  
21 for intubation in intoxicated patients [8]. In our cohort, emergency physicians – according to  
22 their emergency protocols – made a more differentiated decision for intubation based on  
23 GCS, presence of the gag reflex, vomiting and the suspicion of aspiration.  
24  
25

26  
27 An alternative parameter to estimate the risk for aspiration is the presence of the gag or  
28 cough reflex. However, in a very small cohort of patients with pharmacologically induced  
29 coma the cough reflex did not correlate with the GCS, as  $n=4$  of 12 patients (33%) with  
30  $GCS=3$  had an unimpaired cough reflex. On the other hand, 3 of 5 patients (60%) with  
31  $GCS=8$  had an impaired cough reflex [27]. These data are supported by the detection of a  
32 depressed gag reflex in drug-intoxicated patients even at a  $GCS \geq 8$  [28]. Of note, none of  
33 these studies has been performed in alcohol monointoxicated patients. In our study, we  
34 could obtain information on the gag or cough reflex (often referred to as „protective airway  
35  
36  
37  
38  
39  
40  
41  
42  
43  
44  
45  
46  
47  
48  
49  
50  
51  
52  
53  
54  
55  
56  
57  
58  
59  
60

1  
2  
3 reflexes“ by the emergency physician) in n=74 patients. The absence of protective airway  
4 reflexes did significantly correlate with an increased risk of aspiration in a univariate analysis  
5 (Table 3). Furthermore, all airway measures (oxygen supply, Guedel tube application, mask  
6 ventilation, secretion suction) significantly correlated with the rate of aspiration (Table 3). For  
7 instance, the necessity of secretion suction or intubation (on the discretion of the emergency  
8 physician) were each associated with an aspiration rate of >50%. Our data are in line with a  
9 smaller retrospective study on n=155 patients with mixed intoxication in which patients with  
10 reduced GCS or an impaired gag reflex had a higher risk for an aspiration pneumonitis [10].  
11 An absent or reduced gag reflex was found in 96% of their patients with aspiration. However,  
12 the high aspiration rate of 15% in their cohort of mixed intoxication might be related to the  
13 application of gastric lavage and charcoal administration which is not applied in alcohol  
14 monointoxication. Our study impressively shows that the execution of some airway  
15 measures (e.g. oxygen supply) or encountered vomiting indicated only a low risk of  
16 aspiration, while other measures (e.g. mask ventilation, secretion suction, intubation) and the  
17 lack of protective airway reflexes indicate a high incidence for aspiration in these patients.  
18 This would imply a thorough diagnostic (e.g. X-ray, bronchoscopy) or therapeutic (e.g.  
19 antibiotic treatment) work up in these high-risk patients upon ICU admission. However, a  
20 GCS $\leq$ 8 alone should not warp the emergency physician into endotracheal intubation.  
21  
22  
23  
24  
25  
26  
27  
28  
29  
30  
31  
32  
33  
34  
35  
36  
37  
38  
39  
40

41  
42 Although herewith we present - to the best of our knowledge - the most comprehensive  
43 analysis of the aspiration risk in alcohol monointoxicated patients, our study has some  
44 limitations. Due the retrospective nature of our study, we cannot provide direct clinical  
45 recommendations. Since the protective airway reflexes were evaluated by the emergency  
46 team only in subset of patients, there might be a bias towards reporting rather impaired than  
47 normal reflexes. However, since both preserved and impaired protective reflexes were listed  
48 as the reason against and in favor of intubation, respectively, we could not detect unilateral  
49 under- or over-reporting. Since we focused on severely alcohol-intoxicated patients admitted  
50  
51  
52  
53  
54  
55  
56  
57  
58  
59  
60

1  
2  
3 to the intensive care unit of our hospital, our finding might not be extrapolated to the general  
4  
5 population of alcohol monointoxication in an emergency department.  
6  
7  
8  
9

## 10 **Conclusion**

11  
12  
13  
14 In our retrospective study, we found that the blood alcohol level did correlate with the  
15  
16 patient's age but not with the GCS. However, both age and GCS did correlate with the risk  
17  
18 of aspiration (synopsis in Figure 6). Of clinical relevance, we identified risk factors for  
19  
20 aspiration in alcohol monointoxicated patients which could guide the decision for airway  
21  
22 protection measures: Guedel tube application, mask ventilation, loss of protective airway  
23  
24 reflexes, secretion suction. However, a GCS=3 has a very low PPV for aspiration and should  
25  
26 per se not trigger tracheal intubation. On the other hand, since only 6% of patients with  
27  
28 preserved gag reflexes had aspirated, in this patient subgroup the risk of intubation might  
29  
30 prevail its benefits. The high prevalence of aspiration in intubated patients suggests an  
31  
32 aggressive diagnostic workup (e.g. X-ray or bronchoscopy) and a liberate use of prophylactic  
33  
34 antibiotic treatment for aspiration pneumonitis upon admission to the intensive care unit  
35  
36 within this cohort.  
37  
38  
39  
40  
41  
42  
43  
44  
45  
46  
47  
48

49 **Acknowledgements:** The authors like to thank Dr. Thomas Koschny for assistance and  
50  
51 support of graphic data representation.  
52  
53  
54  
55  
56

57 **Conflict of interests:** none  
58  
59  
60

## References

1. Verelst S, Moonen PJ, Desruelles D *et al*. Emergency department visits due to alcohol intoxication: characteristics of patients and impact on the emergency room. *Alcohol Alcohol* 2012;**47**:433-8.
2. Pirmohamed M, Brown C, Owens L *et al*. The burden of alcohol misuse on an inner-city general hospital. *QJM* 2000;**93**:291-5.
3. Myran DT, Hsu AT, Smith G *et al*. Rates of emergency department visits attributable to alcohol use in Ontario from 2003 to 2016: a retrospective population-level study. *CMAJ* 2019;**191**:E804-E10.
4. Krump PE, Cumiskey JM, Lillington GA. Alcohol and the respiratory tract. *Med Clin North Am* 1984;**68**:201-19.
5. Vonghia L, Leggio L, Ferrulli A *et al*. Acute alcohol intoxication. *Eur J Intern Med* 2008;**19**:561-7.
6. Gentleman D, Dearden M, Midgley S *et al*. Guidelines for resuscitation and transfer of patients with serious head injury. *BMJ* 1993;**307**:547-52.
7. Duncan R, Thakore S. Decreased Glasgow Coma Scale score does not mandate endotracheal intubation in the emergency department. *J Emerg Med* 2009;**37**:451-5.
8. Sauter TC, Ronz K, Hirschi T *et al*. Intubation in acute alcohol intoxications at the emergency department. *Scand J Trauma Resusc Emerg Med* 2020;**28**:11.
9. Donald C, Duncan R, Thakore S. Predictors of the need for rapid sequence intubation in the poisoned patient with reduced Glasgow coma score. *Emerg Med J* 2009;**26**:510-2.
10. Eizadi-Mood N, Saghaei M, Alfred S *et al*. Comparative evaluation of Glasgow Coma Score and gag reflex in predicting aspiration pneumonitis in acute poisoning. *J Crit Care* 2009;**24**:470 e9-15.



- 1  
2  
3 11. Montassier E, Le Conte P. Aspiration pneumonia and severe self-poisoning: about  
4 the necessity of early airway management. *J Emerg Med* 2012;**43**:122-3.  
5  
6
- 7 12. Orso D, Vetrugno L, Federici N *et al*. Endotracheal intubation to reduce aspiration  
8 events in acutely comatose patients: a systematic review. *Scand J Trauma Resusc  
9 Emerg Med* 2020;**28**:116.  
10  
11
- 12 13. Zehtabchi S, Sinert R, Baron BJ *et al*. Does ethanol explain the acidosis commonly  
13 seen in ethanol-intoxicated patients? *Clin Toxicol (Phila)* 2005;**43**:161-6.  
14  
15
- 16 14. Tenenbein M. Do you really need that emergency drug screen? *Clin Toxicol (Phila)*  
17 2009;**47**:286-91.  
18  
19
- 20 15. Hulse GK, Robertson SI, Tait RJ. Adolescent emergency department presentations  
21 with alcohol- or other drug-related problems in Perth, Western Australia. *Addiction*  
22 2001;**96**:1059-67.  
23  
24
- 25 16. Romano E, Pollini RA. Patterns of drug use in fatal crashes. *Addiction*  
26 2013;**108**:1428-38.  
27  
28
- 29 17. Mick I, Gross C, Lachnit A *et al*. Alcohol-induced impairment in adolescents admitted  
30 to inpatient treatment after heavy episodic drinking: effects of age and gender. *J Stud  
31 Alcohol Drugs* 2015;**76**:493-7.  
32  
33
- 34 18. Tonisson M, Tillmann V, Kuudeberg A *et al*. Plasma glucose, lactate, sodium, and  
35 potassium levels in children hospitalized with acute alcohol intoxication. *Alcohol*  
36 2010;**44**:565-71.  
37  
38
- 39 19. Shavit I, Konopnicki M, Winkler K *et al*. Serum glucose and electrolyte levels in  
40 alcohol-intoxicated adolescents on admission to the emergency department: an  
41 unmatched case-control study. *Eur J Pediatr* 2012;**171**:1397-400.  
42  
43
- 44 20. Lien D, Mader TJ. Survival from profound alcohol-related lactic acidosis. *J Emerg  
45 Med* 1999;**17**:841-6.  
46  
47  
48  
49  
50  
51  
52  
53  
54  
55  
56  
57  
58  
59  
60

- 1
  - 2
  - 3
  - 4
  - 5
  - 6
  - 7
  - 8
  - 9
  - 10
  - 11
  - 12
  - 13
  - 14
  - 15
  - 16
  - 17
  - 18
  - 19
  - 20
  - 21
  - 22
  - 23
  - 24
  - 25
  - 26
  - 27
  - 28
  - 29
  - 30
  - 31
  - 32
  - 33
  - 34
  - 35
  - 36
  - 37
  - 38
  - 39
  - 40
  - 41
  - 42
  - 43
  - 44
  - 45
  - 46
  - 47
  - 48
  - 49
  - 50
  - 51
  - 52
  - 53
  - 54
  - 55
  - 56
  - 57
  - 58
  - 59
  - 60
21. Shahin H, Gopinath SP, Robertson CS. Influence of alcohol on early Glasgow Coma Scale in head-injured patients. *The Journal of trauma* 2010;**69**:1176-81; discussion 81.
22. Rundhaug NP, Moen KG, Skandsen T *et al*. Moderate and severe traumatic brain injury: effect of blood alcohol concentration on Glasgow Coma Scale score and relation to computed tomography findings. *Journal of neurosurgery* 2015;**122**:211-8.
23. Lange RT, Iverson GL, Brubacher JR *et al*. Effect of blood alcohol level on Glasgow Coma Scale scores following traumatic brain injury. *Brain injury* 2010;**24**:919-27.
24. Sperry JL, Gentilello LM, Minei JP *et al*. Waiting for the patient to "sober up": Effect of alcohol intoxication on glasgow coma scale score of brain injured patients. *The Journal of trauma* 2006;**61**:1305-11.
25. Stuke L, Diaz-Arrastia R, Gentilello LM *et al*. Effect of alcohol on Glasgow Coma Scale in head-injured patients. *Annals of surgery* 2007;**245**:651-5.
26. Binner C, Selinski S, Barysch MJ *et al*. Munich Oktoberfest experience: remarkable impact of sex and age in ethanol intoxication. *Archives of toxicology* 2008;**82**:933-9.
27. Moulton C, Pennycook AG. Relation between Glasgow coma score and cough reflex. *Lancet* 1994;**343**:1261-2.
28. Moulton C, Pennycook A, Makower R. Relation between Glasgow coma scale and the gag reflex. *BMJ* 1991;**303**:1240-1.
29. Adnet F, Baud F. Relation between Glasgow Coma Scale and aspiration pneumonia. *Lancet* 1996;**348**:123-4.
30. Vadeboncoeur TF, Davis DP, Ochs M *et al*. The ability of paramedics to predict aspiration in patients undergoing prehospital rapid sequence intubation. *J Emerg Med* 2006;**30**:131-6.

**Statements**

a. Ethics approval: Not applicable

b. Clinical Trial Registration: Not applicable

c. Funding statement: This research received no specific grant from any funding agency in the public, commercial or not-for-profit sectors.

d. Competing Interest: None declared.

e. Data sharing statement: No additional data available.

f. Contributorship Statement

Planning of the study: MC, AH, EP, RK

Data acquisition: MC, AH, EP, RK

Statistical analysis: TB

Manuscript writing and editing: MC, AH, EP, TB, RK

Submission: RK

**Figure 1**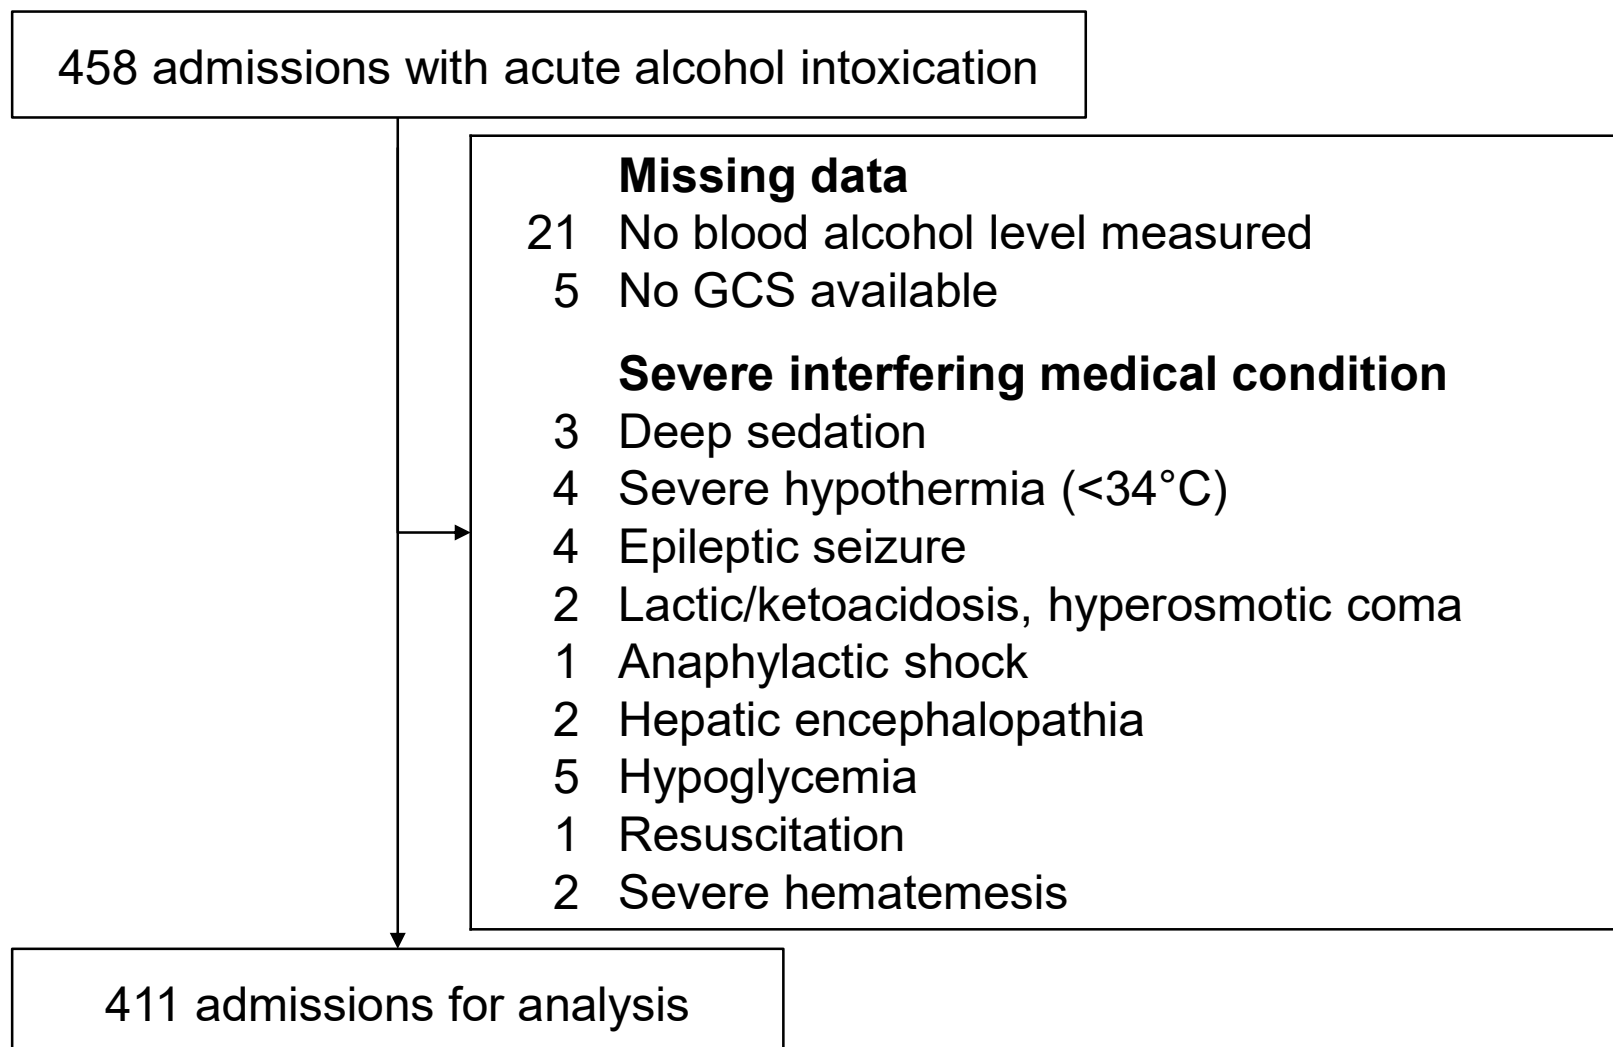

1  
2  
3  
4  
5  
6  
7  
8  
9  
10  
11  
12  
13  
14  
15  
16  
17  
18  
19  
20  
21  
22  
23  
24  
25  
26  
27  
28  
29  
30  
31  
32  
33  
34  
35  
36  
37  
38  
39  
40  
41  
42  
43  
44  
45  
46  
47

**Figure 2A**

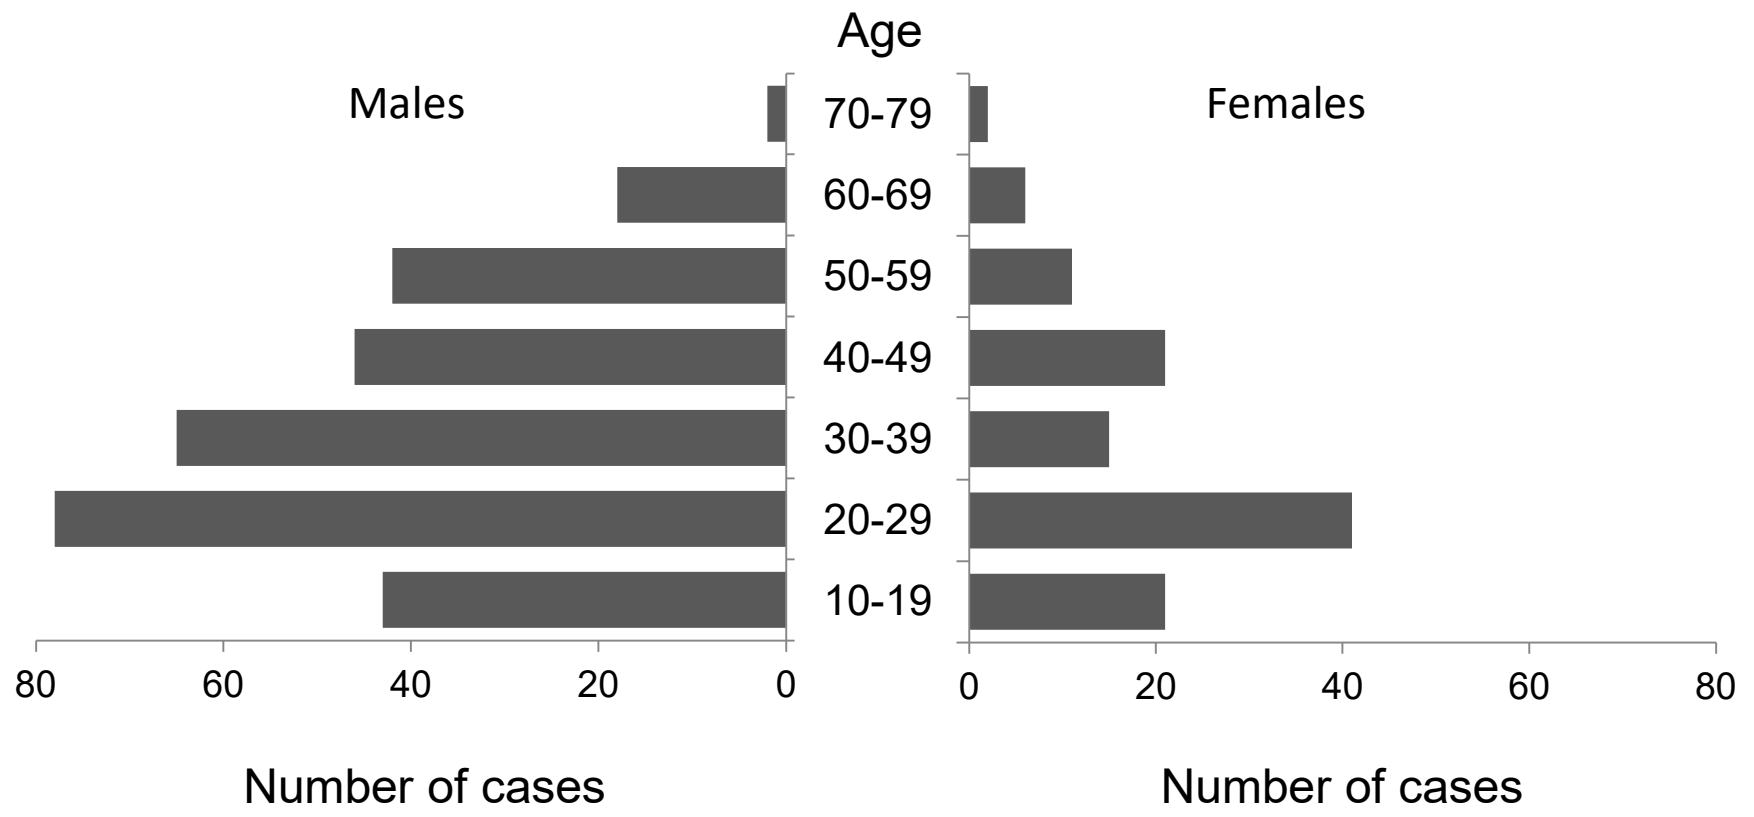

Figure 2B

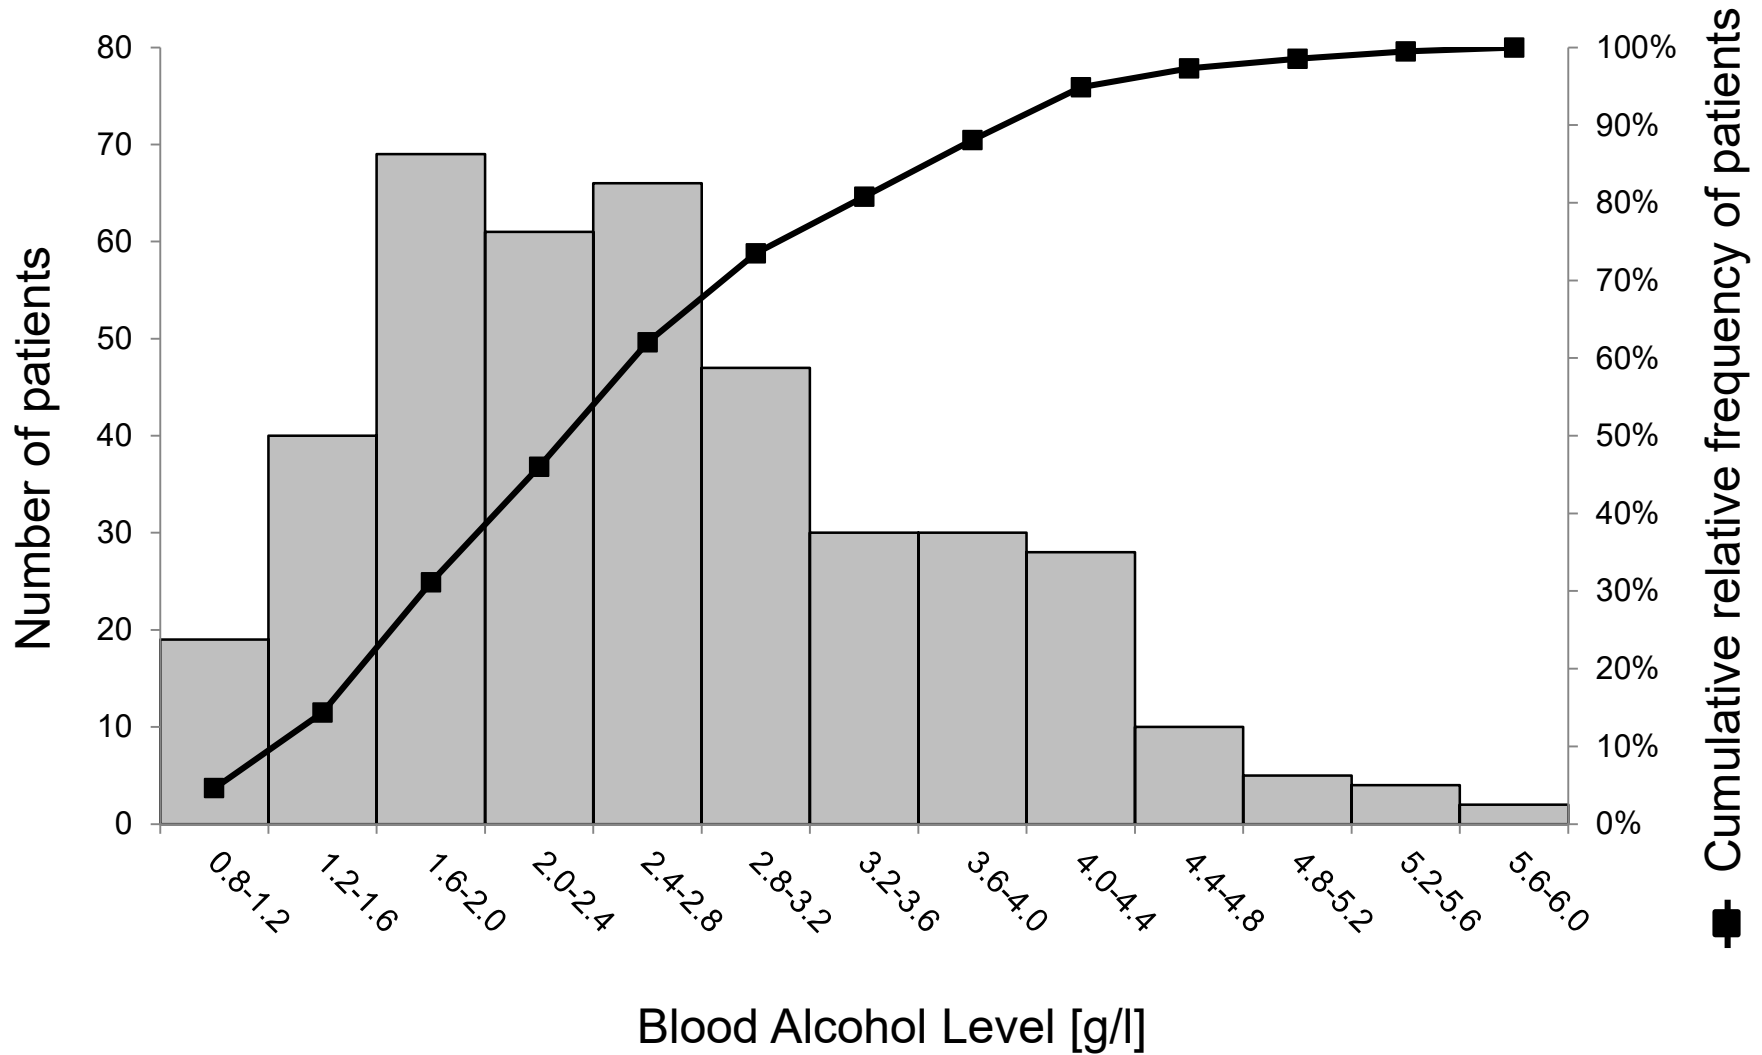

Figure 2C

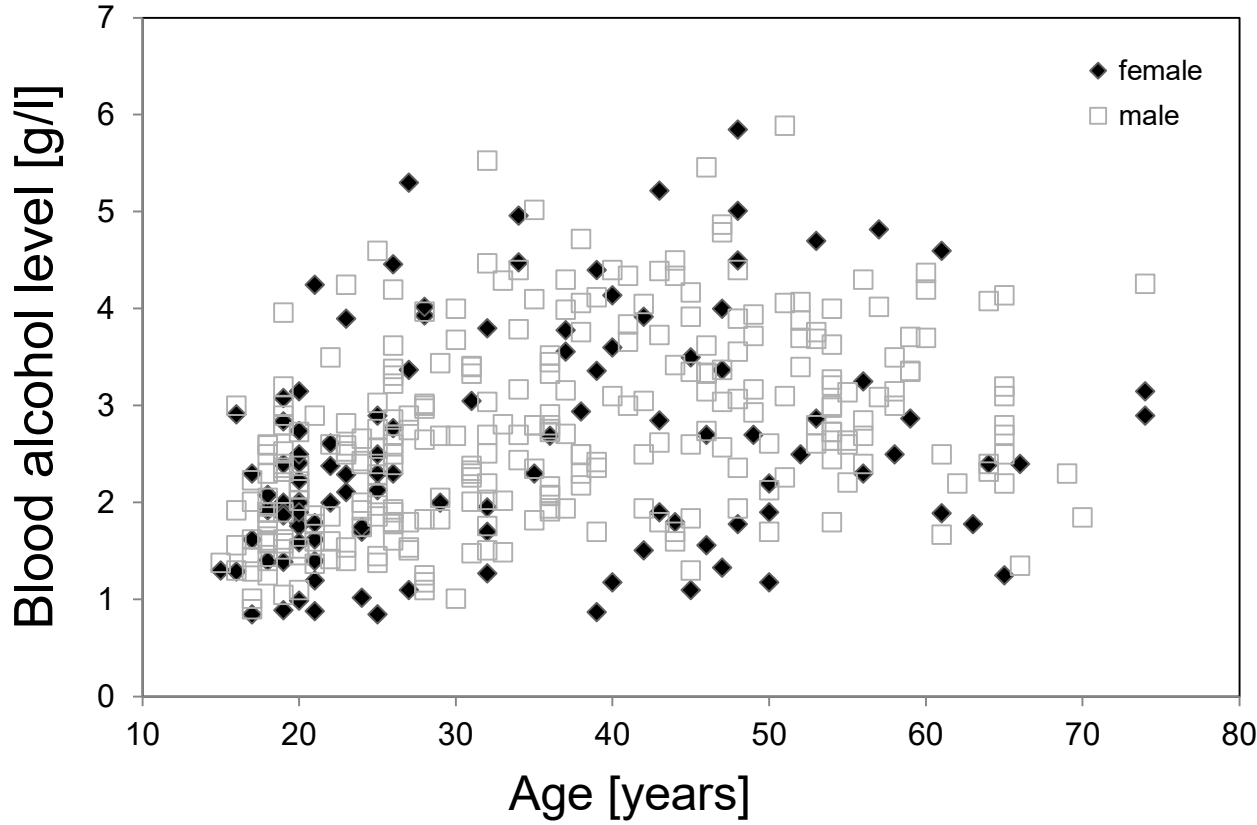

Figure 3

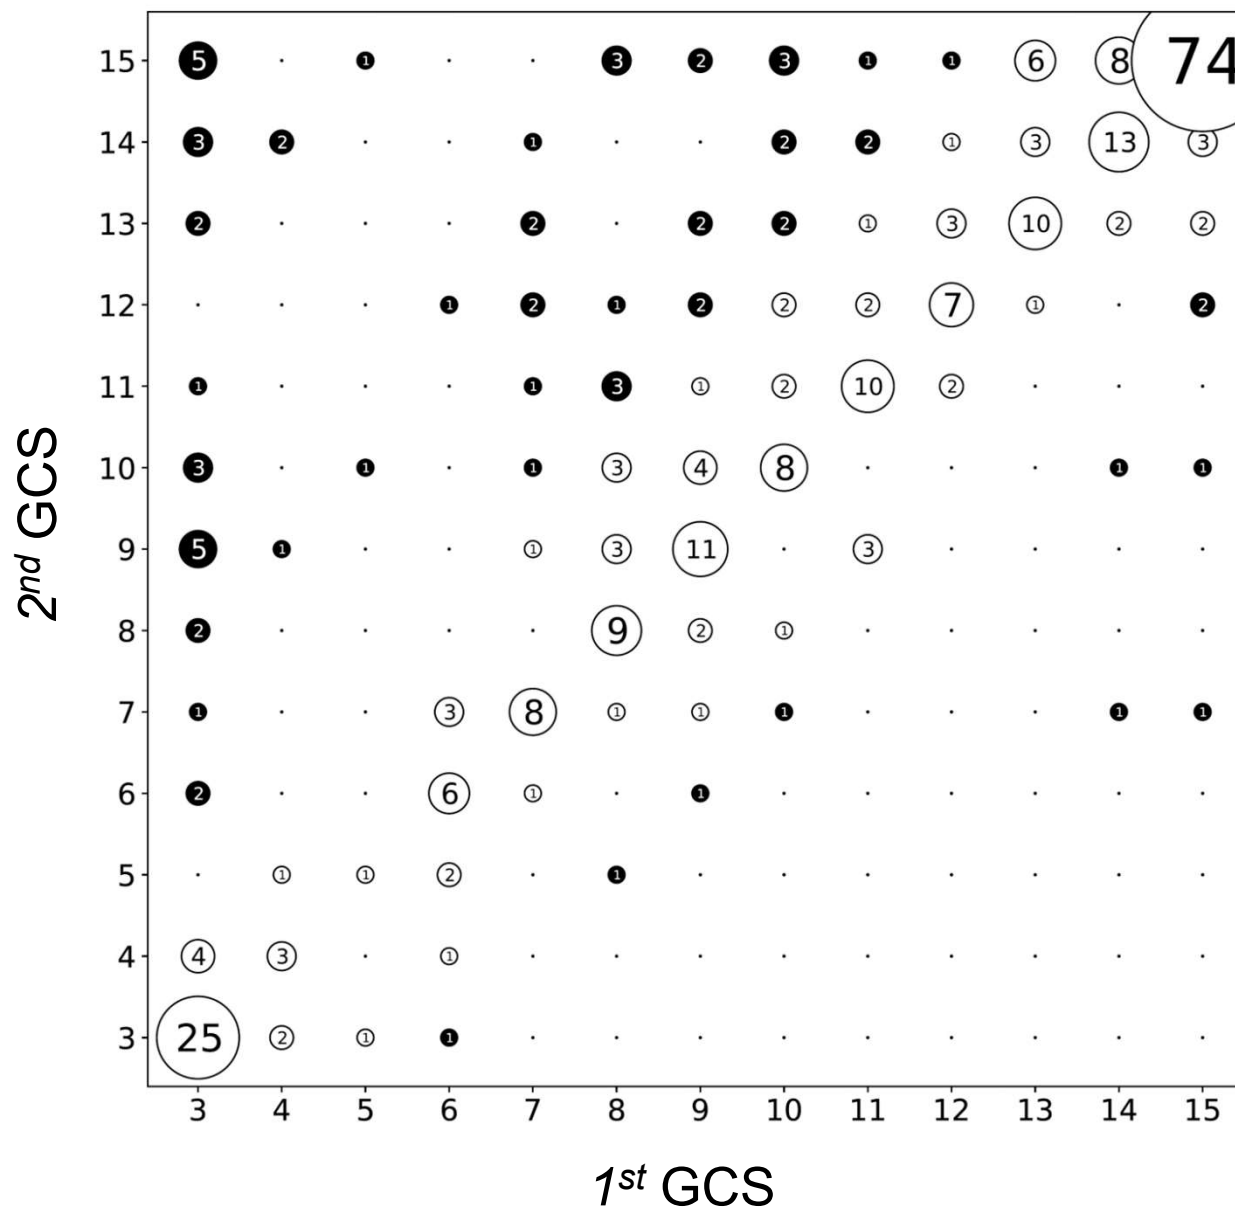





Figure 5A

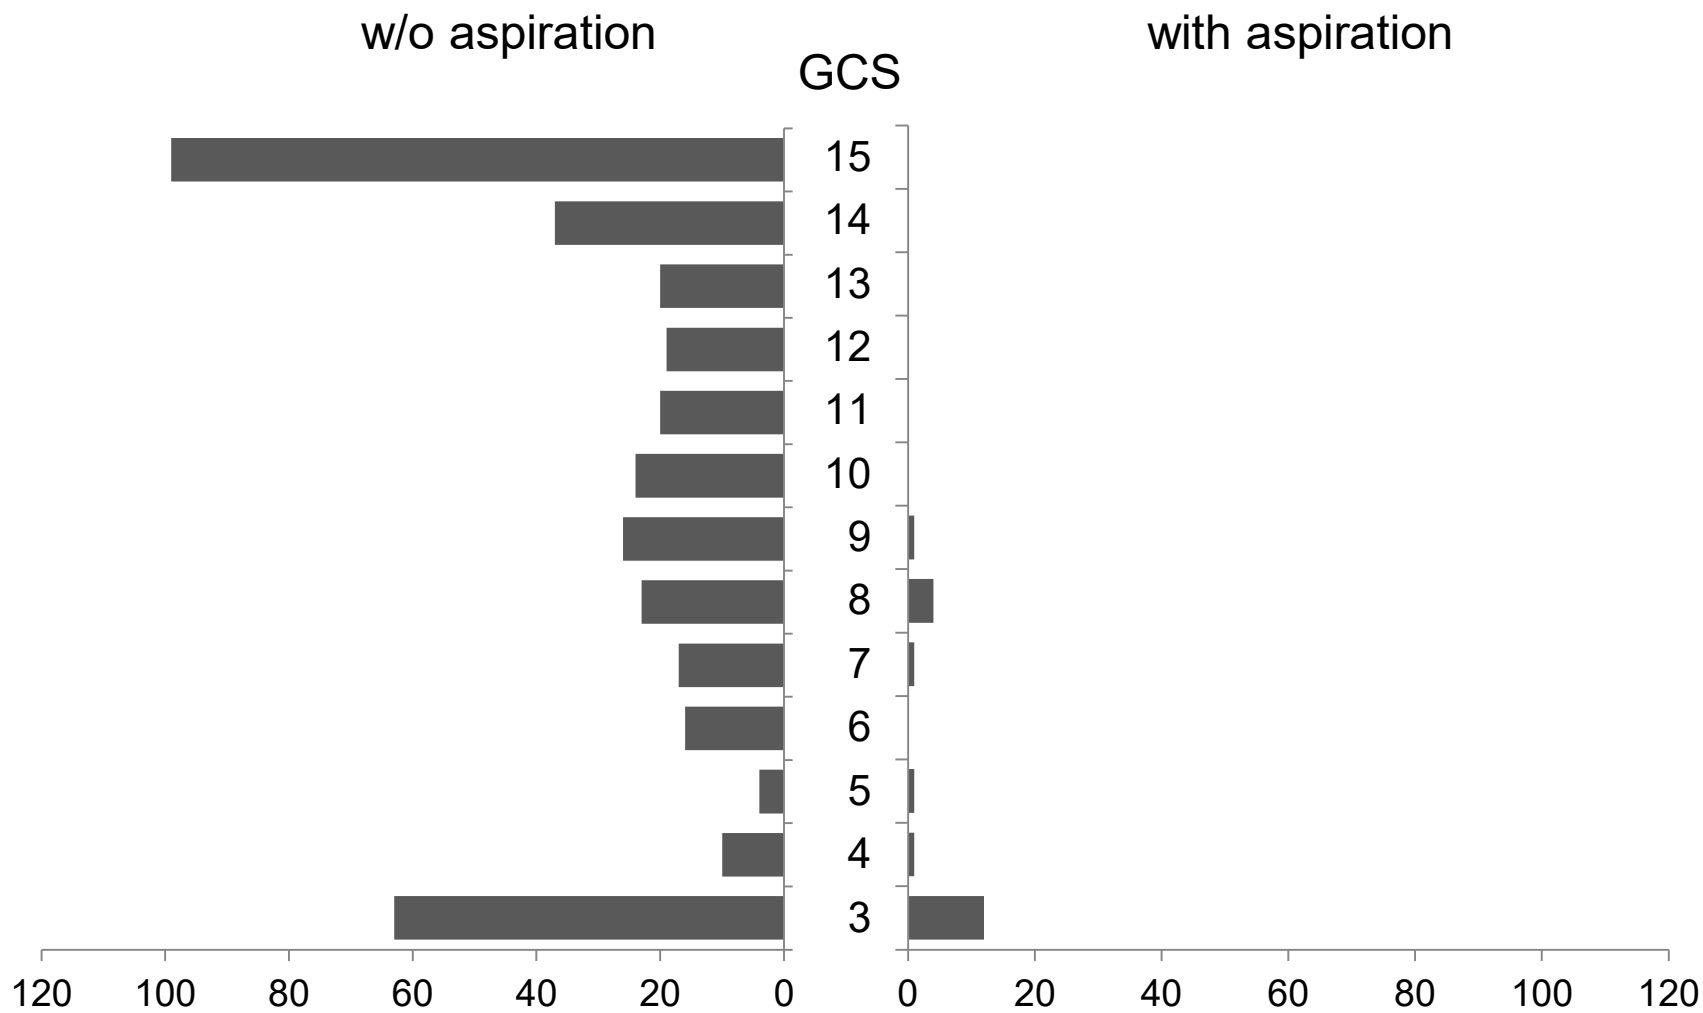

1  
2  
3  
4  
5  
6  
7  
8  
9  
10  
11  
12  
13  
14  
15  
16  
17  
18  
19  
20  
21  
22  
23  
24  
25  
26  
27  
28  
29  
30  
31  
32  
33  
34  
35  
36  
37  
38  
39  
40  
41  
42  
43  
44  
45  
46  
47

**Figure 5B**

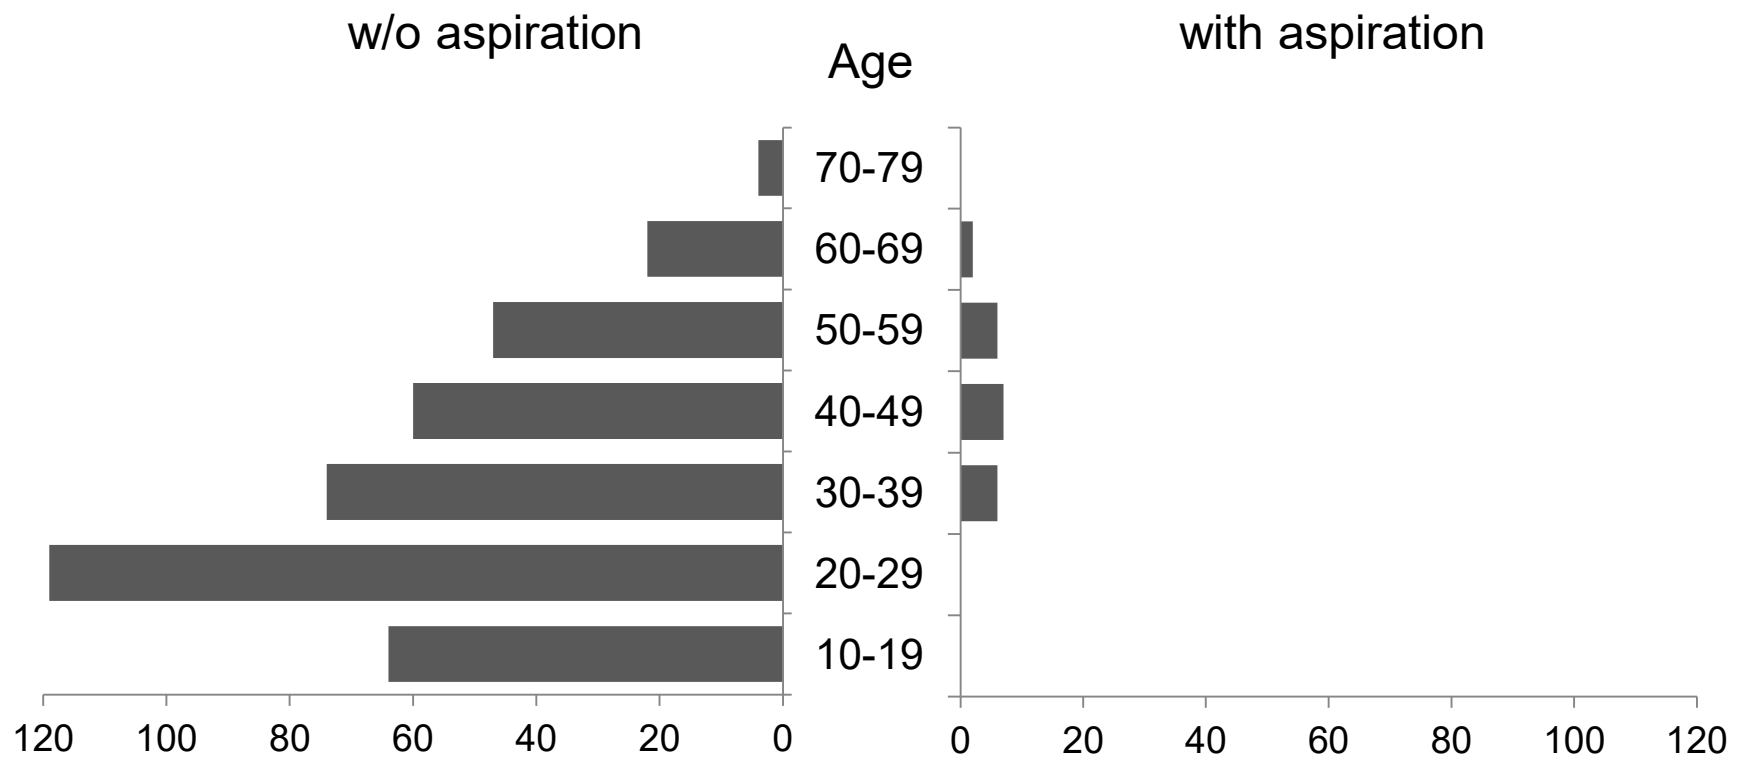

**Figure 5C**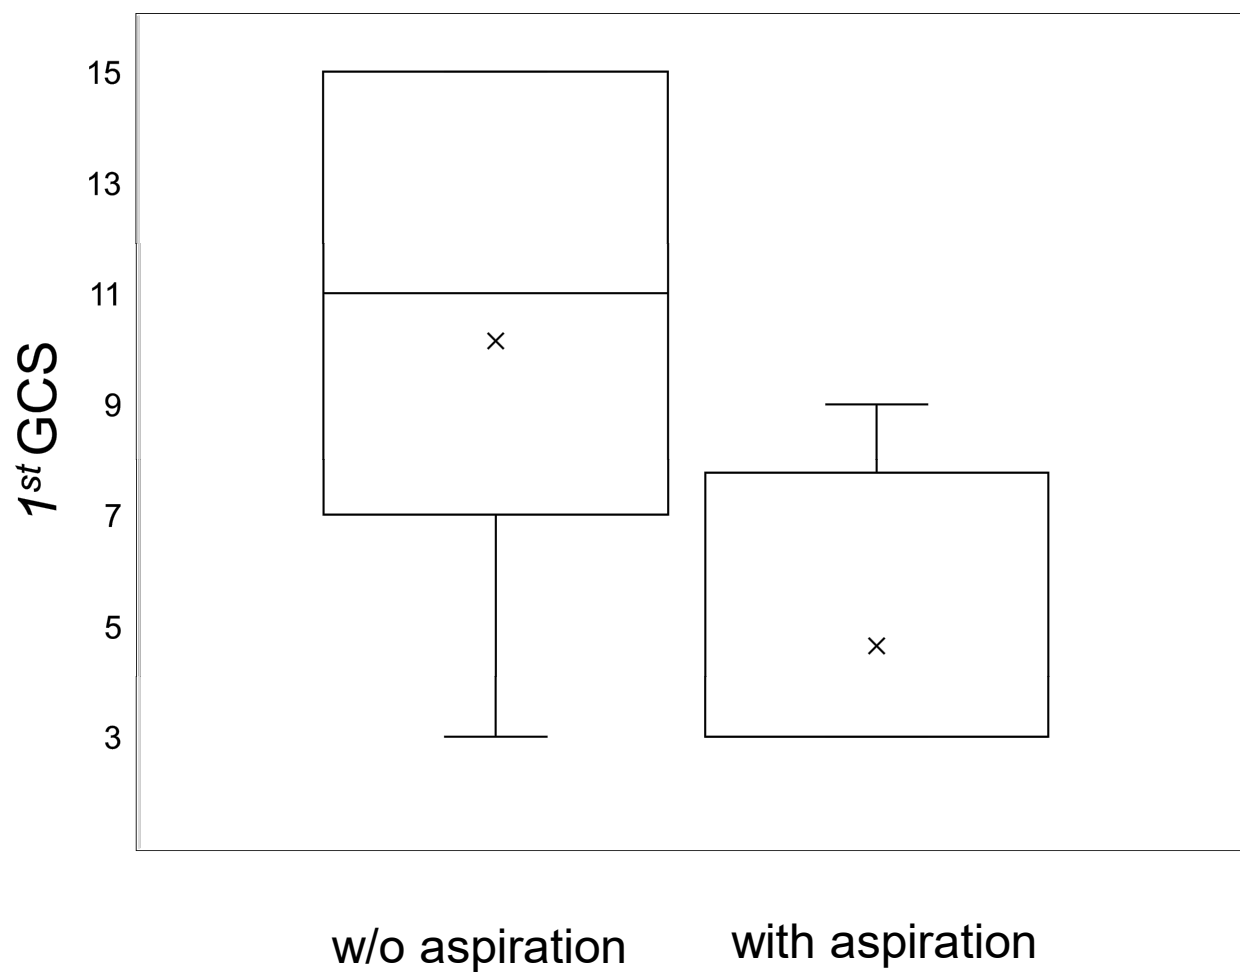

Figure 5D

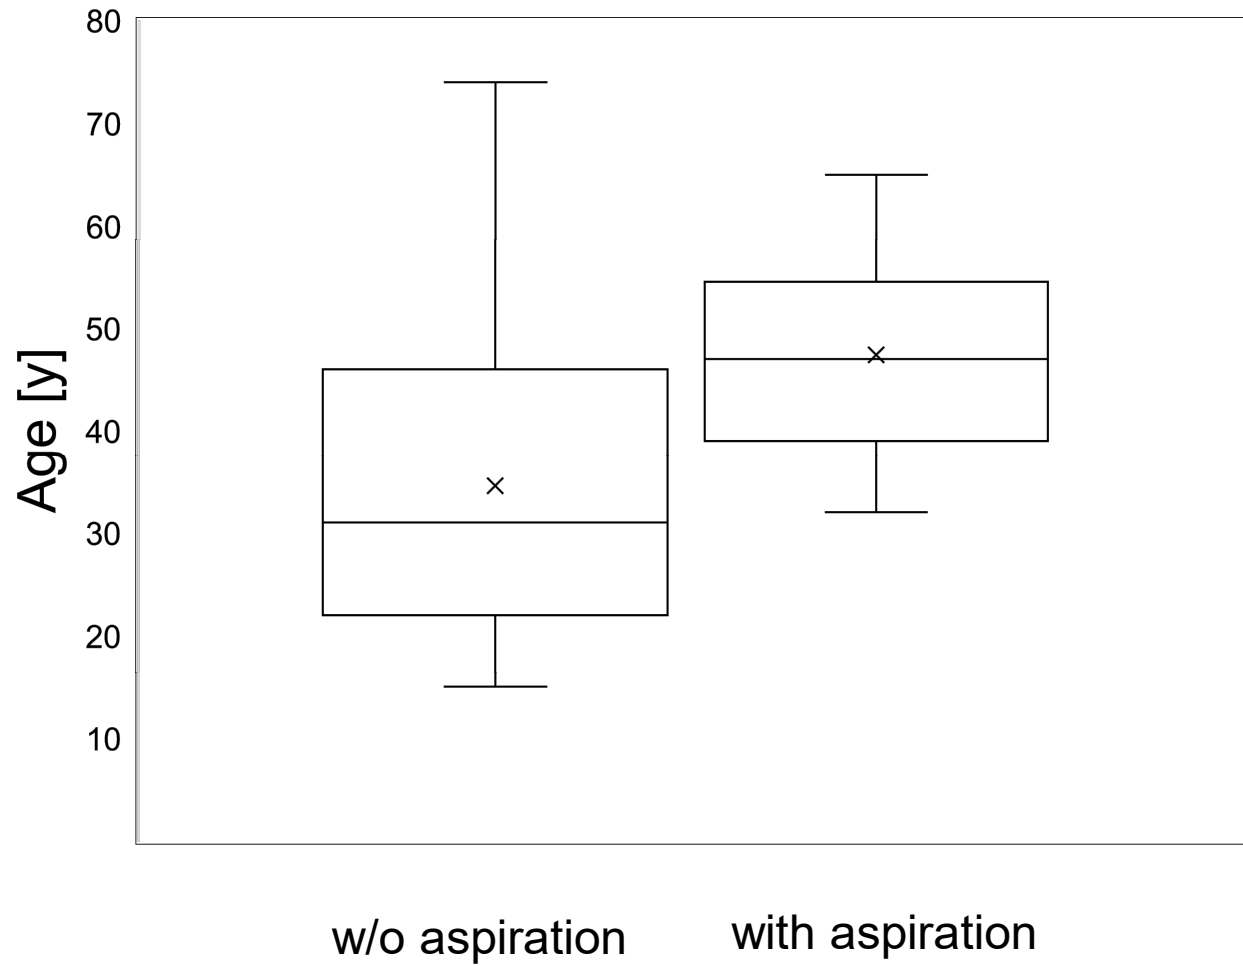

1  
2  
3  
4 **Figure 6**  
5  
6  
7  
8  
9  
10  
11  
12  
13  
14  
15  
16

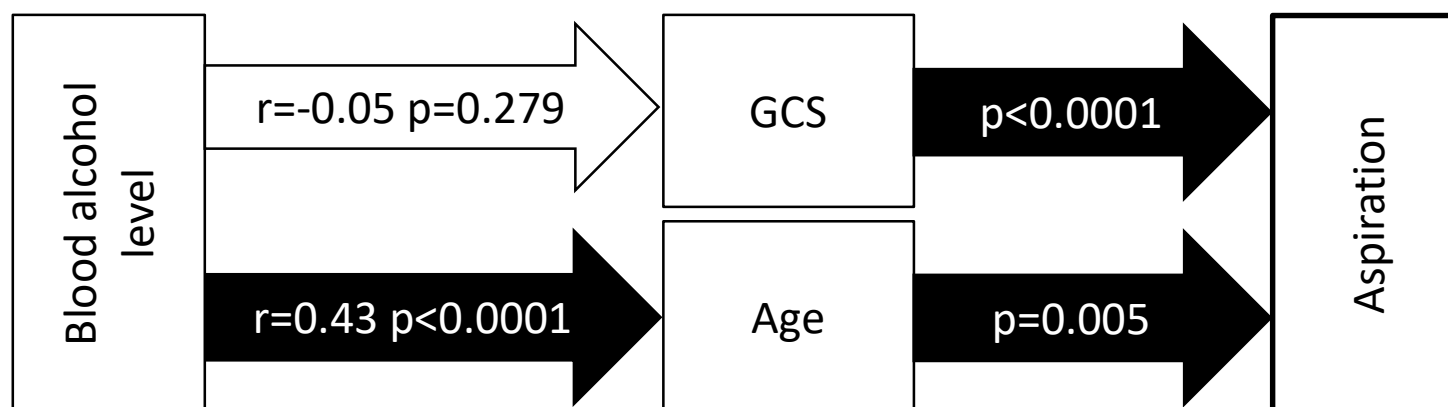

STROBE Statement—Checklist of items that should be included in reports of *cohort studies*

|                              | Item No | Recommendation                                                                                                                                                                                                                                                                                                         | Page No     |
|------------------------------|---------|------------------------------------------------------------------------------------------------------------------------------------------------------------------------------------------------------------------------------------------------------------------------------------------------------------------------|-------------|
| <b>Title and abstract</b>    | 1       | (a) Indicate the study's design with a commonly used term in the title or the abstract                                                                                                                                                                                                                                 | 1           |
|                              |         | (b) Provide in the abstract an informative and balanced summary of what was done and what was found                                                                                                                                                                                                                    | 2           |
| <b>Introduction</b>          |         |                                                                                                                                                                                                                                                                                                                        |             |
| Background/rationale         | 2       | Explain the scientific background and rationale for the investigation being reported                                                                                                                                                                                                                                   | 4           |
| Objectives                   | 3       | State specific objectives, including any prespecified hypotheses                                                                                                                                                                                                                                                       | 4           |
| <b>Methods</b>               |         |                                                                                                                                                                                                                                                                                                                        |             |
| Study design                 | 4       | Present key elements of study design early in the paper                                                                                                                                                                                                                                                                | 5           |
| Setting                      | 5       | Describe the setting, locations, and relevant dates, including periods of recruitment, exposure, follow-up, and data collection                                                                                                                                                                                        | 5           |
| Participants                 | 6       | (a) Give the eligibility criteria, and the sources and methods of selection of participants. Describe methods of follow-up<br>(b) For matched studies, give matching criteria and number of exposed and unexposed                                                                                                      | 5           |
| Variables                    | 7       | Clearly define all outcomes, exposures, predictors, potential confounders, and effect modifiers. Give diagnostic criteria, if applicable                                                                                                                                                                               | 5           |
| Data sources/<br>measurement | 8*      | For each variable of interest, give sources of data and details of methods of assessment (measurement). Describe comparability of assessment methods if there is more than one group                                                                                                                                   | 5           |
| Bias                         | 9       | Describe any efforts to address potential sources of bias                                                                                                                                                                                                                                                              | 9           |
| Study size                   | 10      | Explain how the study size was arrived at                                                                                                                                                                                                                                                                              | 5           |
| Quantitative variables       | 11      | Explain how quantitative variables were handled in the analyses. If applicable, describe which groupings were chosen and why                                                                                                                                                                                           | 6           |
| Statistical methods          | 12      | (a) Describe all statistical methods, including those used to control for confounding<br>(b) Describe any methods used to examine subgroups and interactions<br>(c) Explain how missing data were addressed<br>(d) If applicable, explain how loss to follow-up was addressed<br>(e) Describe any sensitivity analyses | 6<br>8<br>8 |
| <b>Results</b>               |         |                                                                                                                                                                                                                                                                                                                        |             |
| Participants                 | 13*     | (a) Report numbers of individuals at each stage of study—eg numbers potentially eligible, examined for eligibility, confirmed eligible, included in the study, completing follow-up, and analysed<br>(b) Give reasons for non-participation at each stage<br>(c) Consider use of a flow diagram                        | 8<br>9<br>8 |
| Descriptive data             | 14*     | (a) Give characteristics of study participants (eg demographic, clinical, social) and information on exposures and potential confounders<br>(b) Indicate number of participants with missing data for each variable of interest<br>(c) Summarise follow-up time (eg, average and total amount)                         | 8<br>8      |
| Outcome data                 | 15*     | Report numbers of outcome events or summary measures over time                                                                                                                                                                                                                                                         | 8-10        |

|    |                          |                                                                                                                  |                                                                                                                                                                                                              |       |
|----|--------------------------|------------------------------------------------------------------------------------------------------------------|--------------------------------------------------------------------------------------------------------------------------------------------------------------------------------------------------------------|-------|
| 1  | Main results             | 16                                                                                                               | (a) Give unadjusted estimates and, if applicable, confounder-adjusted estimates and their precision (eg, 95% confidence interval). Make clear which confounders were adjusted for and why they were included | 8-10  |
| 2  |                          | (b) Report category boundaries when continuous variables were categorized                                        |                                                                                                                                                                                                              |       |
| 3  |                          | (c) If relevant, consider translating estimates of relative risk into absolute risk for a meaningful time period |                                                                                                                                                                                                              |       |
| 4  | Other analyses           | 17                                                                                                               | Report other analyses done—eg analyses of subgroups and interactions, and sensitivity analyses                                                                                                               | 9     |
| 5  | <b>Discussion</b>        |                                                                                                                  |                                                                                                                                                                                                              |       |
| 6  | Key results              | 18                                                                                                               | Summarise key results with reference to study objectives                                                                                                                                                     | 15    |
| 7  | Limitations              | 19                                                                                                               | Discuss limitations of the study, taking into account sources of potential bias or imprecision. Discuss both direction and magnitude of any potential bias                                                   | 14    |
| 8  | Interpretation           | 20                                                                                                               | Give a cautious overall interpretation of results considering objectives, limitations, multiplicity of analyses, results from similar studies, and other relevant evidence                                   | 11-15 |
| 9  | Generalisability         | 21                                                                                                               | Discuss the generalisability (external validity) of the study results                                                                                                                                        | 14    |
| 10 | <b>Other information</b> |                                                                                                                  |                                                                                                                                                                                                              |       |
| 11 | Funding                  | 22                                                                                                               | Give the source of funding and the role of the funders for the present study and, if applicable, for the original study on which the present article is based                                                | 21    |

\*Give information separately for exposed and unexposed groups.

**Note:** An Explanation and Elaboration article discusses each checklist item and gives methodological background and published examples of transparent reporting. The STROBE checklist is best used in conjunction with this article (freely available on the Web sites of PLoS Medicine at <http://www.plosmedicine.org/>, Annals of Internal Medicine at <http://www.annals.org/>, and Epidemiology at <http://www.epidem.com/>). Information on the STROBE Initiative is available at <http://www.strobe-statement.org>.



# BMJ Open

## Aspiration risk in relation to Glasgow Coma Scale score and clinical parameters in patients with severe acute alcohol intoxication: a single-centre, retrospective study

|                                 |                                                                                                                                                                                                                                                                                                                                                                                                                                                                                                                                                                     |
|---------------------------------|---------------------------------------------------------------------------------------------------------------------------------------------------------------------------------------------------------------------------------------------------------------------------------------------------------------------------------------------------------------------------------------------------------------------------------------------------------------------------------------------------------------------------------------------------------------------|
| Journal:                        | <i>BMJ Open</i>                                                                                                                                                                                                                                                                                                                                                                                                                                                                                                                                                     |
| Manuscript ID                   | bmjopen-2021-053619.R1                                                                                                                                                                                                                                                                                                                                                                                                                                                                                                                                              |
| Article Type:                   | Original research                                                                                                                                                                                                                                                                                                                                                                                                                                                                                                                                                   |
| Date Submitted by the Author:   | 20-Aug-2021                                                                                                                                                                                                                                                                                                                                                                                                                                                                                                                                                         |
| Complete List of Authors:       | Conzelmann, Michael; BASF Corporate Health Management, Dept. of Human Toxicology & Health Risk Assessment; Rudolf Boehm Institute of Pharmacology and Toxicology, Postgraduate Study "Toxicology and Environmental Toxicology"<br>Hoidis, Anne; University Hospital Heidelberg, Dept. of Gastroenterology<br>Bruckner, Thomas; University Hospital Heidelberg, Institute for Medical Biometry and Informatics<br>Popp, Erik; University Hospital Heidelberg, Dept. of Anaesthesiology<br>Koschny, Ronald; University Hospital Heidelberg, Dept. of Gastroenterology |
| <b>Primary Subject Heading</b>: | Emergency medicine                                                                                                                                                                                                                                                                                                                                                                                                                                                                                                                                                  |
| Secondary Subject Heading:      | Intensive care                                                                                                                                                                                                                                                                                                                                                                                                                                                                                                                                                      |
| Keywords:                       | Adult intensive & critical care < ANAESTHETICS, Substance misuse < PSYCHIATRY, TOXICOLOGY                                                                                                                                                                                                                                                                                                                                                                                                                                                                           |
|                                 |                                                                                                                                                                                                                                                                                                                                                                                                                                                                                                                                                                     |

SCHOLARONE™  
Manuscripts

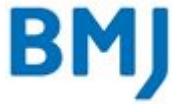

I, the Submitting Author has the right to grant and does grant on behalf of all authors of the Work (as defined in the below author licence), an exclusive licence and/or a non-exclusive licence for contributions from authors who are: i) UK Crown employees; ii) where BMJ has agreed a CC-BY licence shall apply, and/or iii) in accordance with the terms applicable for US Federal Government officers or employees acting as part of their official duties; on a worldwide, perpetual, irrevocable, royalty-free basis to BMJ Publishing Group Ltd ("BMJ") its licensees and where the relevant Journal is co-owned by BMJ to the co-owners of the Journal, to publish the Work in this journal and any other BMJ products and to exploit all rights, as set out in our [licence](#).

The Submitting Author accepts and understands that any supply made under these terms is made by BMJ to the Submitting Author unless you are acting as an employee on behalf of your employer or a postgraduate student of an affiliated institution which is paying any applicable article publishing charge ("APC") for Open Access articles. Where the Submitting Author wishes to make the Work available on an Open Access basis (and intends to pay the relevant APC), the terms of reuse of such Open Access shall be governed by a Creative Commons licence – details of these licences and which [Creative Commons](#) licence will apply to this Work are set out in our licence referred to above.

Other than as permitted in any relevant BMJ Author's Self Archiving Policies, I confirm this Work has not been accepted for publication elsewhere, is not being considered for publication elsewhere and does not duplicate material already published. I confirm all authors consent to publication of this Work and authorise the granting of this licence.

1  
2  
3 **Aspiration risk in relation to Glasgow Coma Scale score and clinical parameters in**  
4 **patients with severe acute alcohol intoxication: a single-centre, retrospective study**  
5  
6  
7  
8  
9

10  
11 Michael Conzelmann <sup>1,2</sup>, Anne Hoidis <sup>3</sup>, Thomas Bruckner <sup>4</sup>, Erik Popp <sup>5</sup>, Ronald Koschny <sup>3</sup>  
12  
13

14  
15  
16  
17 <sup>1</sup> Dept. of Human Toxicology & Health Risk Assessment, BASF Corporate Health  
18 Management, Carl-Bosch-Str. 38, D-67056 Ludwigshafen am Rhein, Germany  
19

20  
21 <sup>2</sup> Postgraduate Study "Toxicology and Environmental Toxicology", Rudolf Boehm Institute  
22 of Pharmacology and Toxicology, University of Leipzig, Haertelstrasse 16-18, 04107  
23 Leipzig, Germany.  
24  
25

26  
27 <sup>3</sup> Dept. of Gastroenterology, University Hospital Heidelberg, INF 410, D-69120 Heidelberg,  
28 Germany  
29

30  
31 <sup>4</sup> Institute for Medical Biometry and Informatics, Heidelberg University Hospital, INF 130.3,  
32 D-69120 Heidelberg, Germany  
33

34  
35 <sup>5</sup> Dept. of Anaesthesiology, University Hospital Heidelberg, INF 420, D-69120 Heidelberg,  
36 Germany  
37  
38  
39  
40

41  
42 ☒ Corresponding author      Prof. Dr. med. Ronald Koschny  
43  
44 ☉ Present address              Dept. of Internal Medicine  
45  
46                                          Im Neuenheimer Feld 410  
47  
48                                          D-69120 Heidelberg, Germany  
49  
50                                          Email: ronald.koschny@med.uni-heidelberg.de  
51  
52                                          Tel.: +49 6221 5637969, Fax: +49 6221 565255  
53  
54

55 **Abbreviated title:**      Aspiration risk in severe acute alcohol intoxication  
56  
57  
58  
59  
60

1  
2  
3 **Key words:** alcohol intoxication, airway management, aspiration, intubation, Glasgow  
4  
5 Coma Scale, protective airway reflex  
6  
7  
8  
9

## 10 11 **Abstract**

12  
13  
14 **Objectives** In alcohol intoxicated patients, the decision for or against airway protection can  
15  
16 be challenging and is often based on the Glasgow Coma Scale (GCS). Primary aim of this  
17  
18 study was to analyse the aspiration risk in relation to the GCS score and clinical parameters  
19  
20 in patients with severe acute alcohol monointoxication. Secondary aim was the association  
21  
22 between the blood alcohol level and the GCS score.  
23

24  
25 **Setting** Single-centre, retrospective study of alcoholised patients admitted to a German  
26  
27 intensive care unit between 2006 and 2020.

28  
29 **Participants** n=411 admissions were eligible for our analysis.

30  
31 **Clinical measures and analysis** The following data were extracted: age, gender,  
32  
33 admission time, blood alcohol level, blood glucose level, initial GCS score, GCS score at  
34  
35 admission, vital signs, clinical signs of aspiration and airway management measures. The  
36  
37 empirical distribution of continuous and categorical data was calculated. Binary multivariable  
38  
39 logistic regression analysis was used to identify possible risk factors for aspiration.  
40

41  
42 **Results** The mean age was 35 years. 72% of the patients were male. The blood alcohol  
43  
44 level (mean 2.7 g/l  $\pm$ 1.0, maximum 5.9 g/l) did not correlate with the GCS score but with the  
45  
46 age of the patient. In univariate analysis, the aspiration risk correlated with blood alcohol  
47  
48 level, age, GCS score, oxygen saturation, respiratory rate, and blood glucose level and was  
49  
50 significantly higher in male patients, upon vomiting, and in patients requiring airway  
51  
52 measures. Aspiration rate was 45% in patients without vs. 6% in patients with preserved  
53  
54 protective reflexes (p=0.0001). In multivariate analysis, only age and GCS score were  
55  
56 significantly associated with the risk of aspiration.  
57  
58  
59  
60

1  
2  
3 **Conclusion** Although in this single-centre, retrospective study the aspiration rate in severe  
4 acute alcohol monointoxicated patients correlates with GCS and protective reflexes, the  
5 decision for endotracheal intubation might rather be based on the presence of different risk  
6 factors for aspiration.  
7  
8  
9  
10

### 11 12 13 14 15 16 **Strengths and limitations of this study**

- 17 • We provide an analysis of the so far largest homogenous cohort of alcohol  
18 monointoxicated non-traumatic ICU patients for risk factors of aspiration.  
19
- 20 • Since the aspiration pneumonia could have developed after the discharge of the  
21 patient from the hospital in cases with short-time in-hospital care, we might have  
22 missed some aspiration events.  
23
- 24 • Since a minority of patients were admitted to the hospital more than once, we  
25 analysed admissions instead of patients as single events.  
26
- 27 • Within our cohort of limited sample size we identified risk factors for aspiration which  
28 could help to guide clinical diagnostic and therapeutic work up.  
29
- 30 • However, due to the retrospective nature of this single-centre study, we cannot  
31 provide direct clinical recommendations.  
32  
33  
34  
35  
36  
37  
38  
39  
40  
41  
42  
43  
44  
45  
46  
47  
48  
49  
50  
51  
52  
53  
54  
55  
56  
57  
58  
59  
60

## Introduction

Patients with acute ethanol intoxication frequently require medical treatment, observation and diagnostics by paramedics, emergency physicians, emergency departments as well as intensive care units (ICU) [1]. Up to 12% of the attendances at the emergency department of an inner-city hospital in the United Kingdom were alcohol-related, mostly due to acute intoxication [2]. In Ontario, Canada, 5.1% of visits to the emergency department were attributable to alcohol use [3]. Besides respiratory depression, an elevated risk of aspiration due to impaired consciousness after alcohol consumption can cause life-threatening complications [4, 5]. In trauma patients with impaired consciousness, a GCS score of 8 or less is widely accepted as an indication for an airway protection by endotracheal intubation [6]. Although alcohol intoxicated patients often present with impaired consciousness and a GCS score of less than 8, the reported intubation rate of 0-2.3% is low compared to the overall intubation rate of 3-5% in prehospital emergencies [7-11]. The clinical benefit of intubating intoxicated patients with a GCS score  $\leq 8$  in order to prevent aspiration is still controversially discussed [8, 9, 12-14]. Apart from adverse events like hypotension and cardiac arrest, prehospital intubation bears a risk of approx. 8% for the development of an intubation-related aspiration pneumonia [15]. Therefore, the risk-benefit ratio of prehospital invasive airway measures needs to be carefully considered. Differences of aspiration and intubation rates between mixed intoxications and alcohol monointoxications suggest that these clinical conditions might not be comparable regarding the necessity for airway protection. In contrast to mixed intoxication, data regarding airway impairment in acute alcohol monointoxication are very scarce.

The primary aim of this study was to search for risk factors for aspiration in adolescent and adult atraumatic patients who required admission to our intensive care unit due to severe acute alcohol monointoxication.. As a secondary aim, we analysed the association between the blood alcohol level and the GCS score.

## Material and Methods

### Study Design and Population

For this retrospective study, all patients who had been admitted to the intensive care unit of the Department of Gastroenterology at the University Hospital of Heidelberg between January 2006 and December 2020 were screened for acute mono-intoxication with alcohol (ethanol). The study was approved by the local ethics board of Heidelberg University (S-329/2013), which waived the need for an informed consent by the patient. Mixed intoxication was assumed when reported by the patient or relatives or in case of indicative prehospital scenarios (empty blisters, visible injection signs) or positive toxicology screening upon admission to the hospital (see "Measurements"). These patients were excluded from the study. Alcohol intoxication was defined as impaired consciousness due to a blood alcohol level  $\geq 0.8$  g/l, which is the legal definition for alcohol intoxication in many countries [16]. Patients with missing data regarding blood alcohol level or GCS score were excluded, as well as patients with severe comorbidities or medical conditions interfering with consciousness, airway situation, aspiration risk or breathing rate. Details of excluded patients are given in Figure 1. Deep therapeutic sedation was defined as sedation by the emergency physician resulting in an iatrogenic GCS score  $\leq 8$ . Severe hypothermia was defined by a core temperature  $\leq 34$  °C. Hypoglycemia was defined as any blood glucose level  $< 65$  mg/dl as the lower level of normal regarding our standard point-of-care-testing (POCT) devices. Concomitant use of common medication at therapeutic doses was permitted. The following data were extracted from the medical records: age, gender, admission time, blood alcohol level, blood glucose level, initial GCS score (1<sup>st</sup> GCS), GCS score at admission to the hospital (2<sup>nd</sup> GCS), initial vital signs (systolic blood pressure, heart rate, breathing rate, peripheral capillary oxygen saturation (SpO<sub>2</sub>)), clinical and prehospital signs of aspiration and airway management measures. When patients were prehospitally intubated, only the first GCS score before intubation was recorded, since the second GCS score was narcosis-induced (usually GCS score=3). Aspiration was rated positive if proven

1  
2  
3 by bronchoscopy or if clinical suspicion was supported by at least one of the following  
4 factors: coughing up aspirate, coarse crackles on auscultation, new opacities on chest x-ray,  
5 development of fever or laboratory signs of inflammation (CRP, leukocytosis) without other  
6 overt reasons. Patients without clinical signs of aspiration or normal bronchoscopy were  
7 rated negative.  
8  
9  
10  
11  
12  
13  
14  
15  
16

### 17 **Measurements**

18  
19 Except for prehospital measurements of blood glucose levels by point-of-care-testing  
20 (POCT) according to the emergency medical service (EMS), blood samples were obtained  
21 immediately after the patient's admission to our hospital for venous blood gas analysis  
22 (RAPIDLab 1200, Siemens Healthcare Diagnostics, Eschborn, Germany), measurement of  
23 blood alcohol level and standard laboratory tests including glucose. When indicated by the  
24 patient's history or clinical data, a qualitative urine toxicology screen (Triage 8 Drugs of  
25 Abuse Panel, Alere Diagnostics, Cologne, Germany) was performed to exclude mixed  
26 intoxications. This test detects the following components: amphetamine, barbiturates,  
27 benzodiazepines, cocaine, methadone, opiates, tetrahydrocannabinol (THC), and tricyclic  
28 antidepressants. Due to the low specificity, sensitivity and clinical benefit, urine toxicology  
29 test was not performed on a regular basis [17].  
30  
31  
32  
33  
34  
35  
36  
37  
38  
39  
40  
41  
42  
43  
44  
45  
46

### 47 **Statistical Analysis**

48  
49 Data entry was performed with help of Microsoft Excel (Version 14.0), for the statistical  
50 analysis SAS Version 9.4 WIN (SAS Institute GmbH, Heidelberg, Germany) was used. The  
51 empirical distribution of continuous data was described with mean, standard deviation and  
52 range, in case of categorical data with absolute and relative frequencies. Spearman's  
53 correlation coefficient was calculated to describe associations between blood alcohol level  
54  
55  
56  
57  
58  
59  
60



1  
2  
3 and laboratory values. Possible differences between patients with and without aspiration  
4 were tested with t-test for continuous data and chi-square-tests for categorical data. Binary  
5 multivariable logistic regression analysis was used to find possible risk factors for aspiration.  
6  
7 Statistical graphics were used to visualise the findings.  
8  
9  
10  
11  
12  
13  
14

### 15 **Patient and Public Involvement**

16  
17  
18 No patient involved.  
19  
20  
21  
22  
23  
24  
25  
26  
27  
28  
29  
30  
31  
32  
33  
34  
35  
36  
37  
38  
39  
40  
41  
42  
43  
44  
45  
46  
47  
48  
49  
50  
51  
52  
53  
54  
55  
56  
57  
58  
59  
60

For peer review only

## Results

A total of n=411 admissions to our intensive care unit for acute alcohol monointoxication comprising n=360 different patients were eligible for our analysis. The baseline characteristics of the enrolled patients and their vital parameters are listed in Table 1.

**Table 1** Baseline characteristics of the study population at admission

|                                                                                             |                         |
|---------------------------------------------------------------------------------------------|-------------------------|
| <b>Total number of admissions</b>                                                           | 411                     |
| <b>Number of different patients</b>                                                         | 360                     |
| <b>Patients with more than 1 admission</b>                                                  | 33                      |
| Patients with 2 admissions                                                                  | 21                      |
| Patients with 3 admissions                                                                  | 7                       |
| Patients with 4 admissions                                                                  | 4                       |
| Patients with 5 admissions                                                                  | 1                       |
| <b>Gender, males/females (%)</b>                                                            | 294/117 (72%/28%)       |
| <b>Age, mean <math>\pm</math>SD, (range) [y]</b>                                            | 35 $\pm$ 15 (15-74)     |
| <b>Blood alcohol level, mean <math>\pm</math>SD, (range) [g/l]</b>                          | 2.7 $\pm$ 1.0 (0.9-5.9) |
| <b>Peripheral oxygen saturation (SpO<sub>2</sub>), mean <math>\pm</math>SD, (range) [%]</b> | 96 $\pm$ 6 (47-100)     |
| <b>Heart rate, mean <math>\pm</math>SD (range) [bpm]</b>                                    | 92 $\pm$ 20 (35-180)    |
| <b>Systolic blood pressure, mean <math>\pm</math>SD (range) [mmHg]</b>                      | 121 $\pm$ 22 (70-200)   |
| <b>Respiratory rate, mean <math>\pm</math>SD (range) [1/min]</b>                            | 15 $\pm$ 5 (0-35)       |

The mean blood alcohol level did not significantly differ between male (2.7 $\pm$ 0.95 g/l) and female (2.5 $\pm$ 1.14 g/l) patients (p=0.132). The maximum blood alcohol level was 5.89 g/l and 5.85 g/l in male and female patients, respectively. In Figure 2, the blood alcohol levels are shown according to age and gender. The blood alcohol level strongly correlated with patient's age (r=0.43, p<0.0001) in the total population, as well as in male (r=0.46, p<0.0001) and female patients (r=0.33, p=0.003).

1  
2  
3 In order to analyse the fluctuating consciousness in acute alcohol intoxication, we compared  
4 the first GCS score of the patient upon arrival of the emergency team with the second GCS  
5 score at admission to the hospital approximately 30-60 minutes later. The median GCS  
6 score improved from 10 to 13 between prehospital presentation and admission to the ICU.  
7  
8 Figure 3 visualises the strong correlation between the first and second GCS score ( $r=0.77$ ,  
9  $p<0.0001$ ). Dots on the diagonal line correspond to patients with identical first and second  
10 GCS scores. We considered a change of  $\pm 3$  GCS points ( $\Delta$ GCS) as clinically relevant. Most  
11 patients ( $n=258$ , 78.5%) did not show a relevant change of the GCS score ( $-2 \leq \Delta$ GCS  $\leq +2$ ).  
12  
13 While  $n=61$  admissions (18.5%) demonstrated an improvement of their consciousness level  
14 during their transport to the hospital ( $\Delta$ GCS score  $\geq +3$ ), only  $n=10$  patients (3.0%) showed a  
15 relevant deterioration ( $\Delta$ GCS score  $\leq -3$ ).  
16  
17

18  
19 To rule out any bias due to mixed GCS records (i.e. pooled first and second GCS scores), all  
20 following analyses regarding GCS scores were performed with the first GCS score only. The  
21 median first GCS score did not differ between male and female patients (10 vs. 10,  
22  $p=0.864$ ). Blood alcohol levels did neither correlate with the initial GCS score in the general  
23 population ( $r=-0.05$ ,  $p=0.279$ ), nor for male ( $r=-0.05$ ,  $p=0.331$ ) or female ( $r=-0.04$ ,  $p=0.673$ )  
24 patients. Nevertheless, very high blood alcohol levels ( $>5$  g/l) were measured only in  
25 patients with a first GCS score  $\leq 11$  (Figure 4). The highest blood alcohol levels of 5.89 and  
26 5.85 g/l were found in 2 patients with a GCS score of 3 and 8, respectively.  
27  
28

29  
30 Within the total population of  $n=411$  patients, aspiration was found in  $n=21$  (5.1%). Aspiration  
31 was diagnosed by a positive bronchoscopy in  $n=5$  (24%) of these patients. In the remaining  
32  $n=16$  patients, diagnosis of aspiration was based on the presence of at least one of the  
33 following criteria: coarse crackles on auscultation ( $n=9$ ), new opacities on chest x-ray ( $n=6$ ),  
34 development of fever or laboratory signs of inflammation ( $n=6$ ). In order to identify risk  
35 factors for aspiration in alcohol intoxicated patients, we compared the cohorts with and  
36 without aspiration regarding demographic characteristics, vital signs, blood alcohol level,  
37  
38  
39  
40  
41  
42  
43  
44  
45  
46  
47  
48  
49  
50  
51  
52  
53  
54  
55  
56  
57  
58  
59  
60

1  
2  
3 blood glucose level and airway management. In univariate analysis of continuous risk factors  
4 for aspiration, patients with aspiration were significantly older (mean age 47.4 vs. 34.6  
5 years), had a higher blood alcohol level (mean 3.4 vs. 2.6 g/l), a lower first GCS score  
6 (median 3 vs. 11), a lower peripheral oxygen saturation (SpO<sub>2</sub>, mean 90 vs. 96%), a lower  
7 respiration rate (mean 13/min vs. 15/min), and a higher blood glucose level (139 vs. 109  
8 mg/dl) (Table 2).  
9  
10  
11  
12  
13  
14  
15  
16  
17  
18  
19  
20  
21  
22  
23  
24  
25  
26  
27  
28  
29  
30  
31  
32  
33  
34  
35  
36  
37  
38  
39  
40  
41  
42  
43  
44  
45  
46  
47  
48  
49  
50  
51  
52  
53  
54  
55  
56  
57  
58  
59  
60

For peer review only

**Table 2** Univariate analysis of continuous risk factors for aspiration

| <b>Parameter</b>                      | <b>Patients w/o aspiration</b><br>Mean $\pm$ SD (range) | <b>Eligible patients</b> | <b>Patients with aspiration</b><br>Mean $\pm$ SD (range) | <b>Eligible patients</b> | <b>p-value</b> |
|---------------------------------------|---------------------------------------------------------|--------------------------|----------------------------------------------------------|--------------------------|----------------|
| <b>Age [y]</b>                        | 34.6 $\pm$ 14.5 (15-74)                                 | 390                      | 47.4 $\pm$ 9.3 (32-65)                                   | 21                       | <0.0001        |
| <b>Blood alcohol level [g/l]</b>      | 2.6 $\pm$ 1.0 (0.9-5.9)                                 | 390                      | 3.4 $\pm$ 1.3 (1.7-5.5)                                  | 21                       | 0.017          |
| <b>Initial GCS score</b>              | 11 (median) $\pm$ 4 (3-15)                              | 378                      | 3 (median) $\pm$ 2 (3-9)                                 | 20                       | <0.0001        |
| <b>SpO<sub>2</sub> [%]</b>            | 96 $\pm$ 6 (47-100)                                     | 365                      | 90 $\pm$ 8 (73-100)                                      | 21                       | 0.006          |
| <b>Systolic blood pressure [mmHg]</b> | 121 $\pm$ 22 (70-200)                                   | 371                      | 122 $\pm$ 20 (96-160)                                    | 21                       | 0.772          |
| <b>Heart rate [bpm]</b>               | 92 $\pm$ 20 (35-180)                                    | 377                      | 89 $\pm$ 20 (50-120)                                     | 21                       | 0.580          |
| <b>Respiratory rate [1/min]</b>       | 15 $\pm$ 5 (0-35)                                       | 302                      | 13 $\pm$ 3 (8-18)                                        | 19                       | 0.014          |
| <b>Blood glucose level [mg/dl]</b>    | 109 $\pm$ 40 (65-487)                                   | 388                      | 139 $\pm$ 60 (72-335)                                    | 21                       | 0.028          |

1  
2  
3 Furthermore, univariate results of binary risk factors revealed a significantly higher risk for  
4 aspiration for male patients, patients with documented airway measures as listed in Table 3.  
5  
6  
7  
8  
9  
10  
11  
12  
13  
14  
15  
16  
17  
18  
19  
20  
21  
22  
23  
24  
25  
26  
27  
28  
29  
30  
31  
32  
33  
34  
35  
36  
37  
38  
39  
40  
41  
42  
43  
44  
45  
46  
47  
48  
49  
50  
51  
52  
53  
54  
55  
56  
57  
58  
59  
60

For peer review only

**Table 3** Univariate analysis of binary risk factors for aspiration

| Parameter                                                           | Manifestation | Patients w/o aspiration [%] | Patients with aspiration [%] | Evaluable patients | p-value |
|---------------------------------------------------------------------|---------------|-----------------------------|------------------------------|--------------------|---------|
| <b>Gender</b>                                                       | Male          | 93.5                        | 6.5                          | 294                | 0.048   |
|                                                                     | Female        | 98.3                        | 1.7                          | 117                |         |
| <b>Vomiting</b>                                                     | No            | 96.4                        | 3.7                          | 329                | 0.017   |
|                                                                     | Yes           | 89.9                        | 10.1                         | 79                 |         |
| <b>Oxygen supply</b>                                                | No            | 99.2                        | 0.8                          | 265                | <0.0001 |
|                                                                     | Yes           | 86.9                        | 13.1                         | 145                |         |
| <b>Guedel tube application</b>                                      | No            | 95.5                        | 4.5                          | 400                | 0.0003  |
|                                                                     | Yes           | 70.0                        | 30.0                         | 10                 |         |
| <b>Mask ventilation</b>                                             | No            | 95.8                        | 4.2                          | 400                | <0.0001 |
|                                                                     | Yes           | 60.0                        | 40.0                         | 10                 |         |
| <b>Protective airway reflexes (at GCS score <math>\leq</math>8)</b> | No            | 54.6                        | 45.4                         | 22                 | 0.0001  |
|                                                                     | Yes           | 94.2                        | 5.8                          | 52                 |         |
| <b>Secretion suction</b>                                            | No            | 96.5                        | 3.5                          | 396                | <0.0001 |
|                                                                     | Yes           | 46.1                        | 53.9                         | 13                 |         |
| <b>Intubation</b>                                                   | No            | 98.4                        | 1.6                          | 384                | <0.0001 |
|                                                                     | Yes           | 44.4                        | 55.6                         | 27                 |         |

1  
2  
3 Intubated patients showed a significantly higher aspiration rate than patient's without  
4 intubation (56% vs. 1.6%). Since many emergency physicians base their decision for  
5 intubation in patients with a GCS score  $\leq 8$  on the presence or absence of the swallowing  
6 and gag reflex, the presence of these protective reflexes was correlated with the risk of  
7 aspiration. A total of n=152 patients had a first GCS score  $\leq 8$ . Data regarding protective  
8 reflexes were available in n=74 (48.7%) of these patients. Protective reflexes in patients with  
9 GCS score  $\leq 8$  were present in n=52 (70.3%), but absent in n=22 (29.7%). The absence of  
10 protective reflexes was significantly associated with a higher risk of aspiration: 45.4%  
11 aspiration rate in patients without vs. 5.8% in patients with protective reflexes (p=0.0001,  
12 Table 3).  
13  
14  
15  
16  
17  
18  
19  
20  
21  
22  
23  
24

25 On multivariate analysis of the risk factors gender, age, blood alcohol level, first GCS score,  
26 and oxygen saturation, only age (OR 1.06) and GCS score (OR 0.71) significantly correlated  
27 with the risk of aspiration (Table 4).  
28  
29  
30  
31  
32  
33  
34

35 **Table 4** Odds ratio estimates in multivariate analysis of risk factors for aspiration.  
36

| Risk factor                 | OR   | 95% confidence limits |       | p-value |
|-----------------------------|------|-----------------------|-------|---------|
| Gender (male versus female) | 3.29 | 0.67                  | 16.03 | 0.141   |
| Age                         | 1.06 | 1.02                  | 1.10  | 0.005   |
| Blood alcohol level         | 1.26 | 0.80                  | 2.00  | 0.320   |
| First GCS score             | 0.71 | 0.60                  | 0.84  | <0.0001 |
| Oxygen saturation           | 0.98 | 0.93                  | 1.03  | 0.397   |

37  
38  
39  
40  
41  
42  
43  
44  
45  
46  
47  
48  
49  
50  
51  
52  
53  
54 Due to the low number of complete data sets, presence of protective reflexes could not be  
55 included in the multivariate analysis. The difference of age and GCS score between  
56 aspirated and non-aspirated patients is visualized as box plots in Figure 5A & B. However, a  
57  
58  
59  
60



1  
2  
3 GCS score=3 had a low sensitivity (60%) and a moderate specificity (83%) for aspiration,  
4  
5 with a positive predictive value (PPV) of only 16% and very high negative predictive value  
6  
7 (NPV) of 98%. Since information on the preservation of protective airway reflexes in these  
8  
9 patients were rather scarce, the PPV and NPV were calculated for a GCS score=3,  
10  
11 irrespective of the gag reflex.  
12  
13  
14  
15  
16  
17  
18  
19  
20  
21  
22  
23  
24  
25  
26  
27  
28  
29  
30  
31  
32  
33  
34  
35  
36  
37  
38  
39  
40  
41  
42  
43  
44  
45  
46  
47  
48  
49  
50  
51  
52  
53  
54  
55  
56  
57  
58  
59  
60

For peer review only

## Discussion

Acute alcohol intoxication constitutes a frequent medical problem with a considerable socio-economic and health care system burden. The demographic analysis of our cohort shows a predominance of young male patients, which is comparable to other demographic studies [18, 19]. However, our ICU cohort showed a younger age distribution than another retrospectively analysed cohort of patients admitted to an emergency department [1]. With a mean alcohol level of 2.7 g/l, our cohort showed higher blood alcohol levels than many other studies [20-23], which might be due to the selection of ICU patients. In contrast to Vereslt et al. [1], a higher age was associated with a higher blood alcohol level in our cohort.

Since the short period of prehospital care of alcoholised patients impedes a relevant alcohol degradation, one would expect – if at all – a deterioration of the GCS between the first patient contact and the admission to the hospital due to an ongoing alcohol resorption in the alimentary tract. However, 19% of our patients showed an improvement of more than 2 GCS score points during their prehospital care, but only 3% of patients showed a relevant deterioration. Overall, we found a strong correlation between the first and second GCS score. The prehospital blood alcohol level is not routinely available to the emergency team. Therefore, we can neither provide data on its kinetics, nor does the clinical decision rely on these data. The GCS score of head injured trauma patients with additional alcohol intoxication also improved between prehospital care and the emergency department [24]. This implies that the measurement time point of the GCS score during the prehospital care should be exactly defined and pooling of GCS data from different phases of care should be avoided. Slight changes in GCS score might not necessarily reflect a clinically relevant change of consciousness level of alcoholised patients. We, therefore, considered only an arbitrarily defined  $\Delta$ GCS of  $\geq 3$  as clinically relevant.

Most data on the influence of alcohol on the GCS score were derived from trauma patients. Some studies showed a correlation between blood alcohol level and GCS score [25], while

1  
2  
3 others did not [26-28]. Interestingly, data on a correlation between blood alcohol level and  
4  
5 GCS score in alcohol-intoxicated patients without concomitant trauma are very scarce and  
6  
7 the clinical consequence of low GCS values is unclear. In a cohort of alcohol-intoxicated  
8  
9 patients without trauma from the Oktoberfest in Munich the blood alcohol level was not  
10  
11 predictive for the need of hospitalisation [29]. Concordantly, in our study on non-traumatic  
12  
13 alcoholised patients, the blood alcohol level did not correlate with the GCS score even at a  
14  
15 considerably high mean blood alcohol level of 2.7 g/l. Nevertheless, n=8 patients of our  
16  
17 cohort with an extremely high blood alcohol level of  $\geq 5$  g/l demonstrated a reduced median  
18  
19 GCS score of 5. This cohort, however, was too small for a subgroup analysis. In contrast, in  
20  
21 adolescent patients (13-17 years of age) with rather mild alcohol intoxication (mean 1.6 g/l),  
22  
23 Mick et al. found a significant correlation between the blood alcohol level and the GCS score  
24  
25 [20]. One might speculate that adolescents and younger adults have not yet undergone  
26  
27 habituation to regular alcohol consumption. However, even in the youngest subgroup (15-25  
28  
29 years) of our study, there was no significant correlation between blood alcohol level and  
30  
31 GCS score (n=136 patients, mean blood alcohol level 2.1 g/l, median GCS score 10,  
32  
33 p=0.061).  
34  
35  
36  
37

38 One of the most challenging clinical problems in unconscious alcohol-intoxicated patients is  
39  
40 the decision for or against airway protection by intubation. Many studies were performed in  
41  
42 heterogeneous cohorts of mixed intoxication [7, 9, 30-32], in trauma patients [8, 33] or  
43  
44 without any data on the risk of aspiration [8, 30]. While some authors and recommendations  
45  
46 refer to a GCS score  $\leq 8$  as an indication for intubation in alcohol intoxicated patients, the  
47  
48 association of a low GCS score with a higher risk of aspiration has not been sufficiently  
49  
50 substantiated in these patients. In their prospective observational study, Duncan et al. did  
51  
52 not find a higher rate of aspiration in patients with a GCS score  $\leq 8$  [7]. However, only n=22  
53  
54 of 73 patients had alcohol monointoxication and only n=12 patients of their entire cohort  
55  
56 demonstrated a GCS score  $\leq 8$ . Comparing n=12 intubated (mean GCS score 5.9) with n=14  
57  
58 not-intubated (mean GCS score 5.5) patients with mixed intoxication, Donald et al. did not  
59  
60

1  
2  
3 detect a difference in laboratory or physiological parameters. However, the aspiration rate  
4 was not analysed [9]. None of the intubated patients had an alcohol intoxication. In patients  
5 with a mixed intoxication, the risk of aspiration pneumonia did not significantly differ between  
6 patients with a GCS score  $\leq 8$  versus a GCS score  $> 8$  [13]. In another prospective study on  
7 n=224 drug-intoxicated patients, there was no correlation between the GCS score and the  
8 risk of aspiration [32]. A GCS score  $\leq 8$  was not considered as essential for an increased risk  
9 of aspiration. However, the aspiration rate in that drug-intoxicated cohort was very high  
10 (29%) compared to our study (5%). This indicates that mixed intoxication and alcohol  
11 monointoxication might not be comparable regarding the risk of aspiration.  
12  
13

14  
15  
16 In our study on non-traumatic alcohol-monointoxicated patients, we found a strong  
17 correlation between the GCS score and the risk of aspiration, even in a multivariate  
18 regression model. However, n=133 of the 152 patients (87.5%) with GCS score  $\leq 8$  did not  
19 aspirate. Thus, even for a GCS score =3 the PPV is too low (16%) to guide the decision for  
20 intubation. However, Sauter et al. described that a GCS score  $\leq 8$  was the main reason for  
21 emergency teams to decide for intubation in intoxicated patients [8]. In our cohort,  
22 emergency physicians – according to their emergency protocols – made a more  
23 differentiated decision for intubation based on GCS score, presence of the gag reflex,  
24 vomiting and the suspicion of aspiration.  
25  
26

27  
28  
29 An alternative parameter to estimate the risk for aspiration is the presence of the gag or  
30 cough reflex. However, in a very small cohort of patients with pharmacologically induced  
31 coma the cough reflex did not correlate with the GCS score, as n=4 of 12 patients (33%)  
32 with a GCS score =3 had an unimpaired cough reflex. On the other hand, 3 of 5 patients  
33 (60%) with a GCS score =8 had an impaired cough reflex [30]. These data are supported by  
34 the detection of a depressed gag reflex in drug-intoxicated patients even at a GCS score  $\geq 8$   
35 [31]. Of note, none of these studies has been performed in alcohol monointoxicated patients.  
36  
37 In our study we could obtain information on the gag or cough reflex in n=74 patients. The  
38  
39  
40  
41  
42  
43  
44  
45  
46  
47  
48  
49  
50  
51  
52  
53  
54  
55  
56  
57  
58  
59  
60

1  
2  
3 absence of protective airway reflexes did significantly correlate with an increased risk of  
4 aspiration in a univariate analysis (Table 3). Furthermore, all airway measures significantly  
5 correlated with the rate of aspiration (Table 3). For instance, the necessity of secretion  
6 suction or intubation (on the discretion of the emergency physician) were each associated  
7 with an aspiration rate of >50%. Our data are in line with a smaller retrospective study on  
8 n=155 patients with mixed intoxication in which patients with reduced GCS scores or an  
9 impaired gag reflex had a higher risk for an aspiration pneumonitis [12]. An absent or  
10 reduced gag reflex was found in 96% of their patients with aspiration. However, the high  
11 aspiration rate of 15% in their cohort of mixed intoxication might be related to the application  
12 of gastric lavage and charcoal administration which is not applied in alcohol  
13 monointoxication. Our study impressively shows that the execution of some airway  
14 measures (e.g. oxygen supply) or encountered vomiting indicated only a low risk of  
15 aspiration, while other measures (e.g. mask ventilation, secretion suction, intubation) and the  
16 lack of protective airway reflexes indicate a high aspiration incidence in these patients. This  
17 would imply a thorough diagnostic (e.g. X-ray, bronchoscopy) or therapeutic (e.g. antibiotic  
18 treatment) work-up in these high-risk patients upon ICU admission. However, a GCS score  
19  $\leq 8$  alone should not warp the emergency physician into endotracheal intubation.

20  
21  
22 Although herewith we present - to the best of our knowledge - the most comprehensive  
23 analysis of the aspiration risk in alcohol monointoxicated patients, our study has some  
24 limitations. Due the retrospective nature of our study, we cannot provide direct clinical  
25 recommendations. Since protective airway reflexes were evaluated by the emergency team  
26 only in a subset of patients, there might be a bias towards reporting rather impaired than  
27 normal reflexes. However, since both preserved and impaired protective reflexes were listed  
28 as the reason against and in favor of intubation, respectively, we could not detect unilateral  
29 under- or over-reporting. Since we focused on severely alcohol-intoxicated patients admitted  
30 to the ICU of our hospital, our finding might not be extrapolated to the general population  
31 with alcohol monointoxication in an emergency department.

## Conclusion

In our retrospective study, we found that the blood alcohol level did correlate with the patient's age but not with the GCS score. However, both age and GCS score did correlate with the risk of aspiration. Of clinical relevance, we identified risk factors for aspiration in alcohol monointoxicated patients which could guide the decision for airway protection measures: Guedel tube application, mask ventilation, loss of protective airway reflexes, secretion suction. However, a GCS score =3 has a very low PPV for aspiration and, as a single parameter, might not trigger endotracheal intubation. On the other hand, since only 6% of patients with preserved gag reflexes had aspirated, in this patient subgroup the risk of intubation might prevail its benefits. Based on these single-centre, retrospective data the high prevalence of aspiration in intubated patients suggests that these patients might benefit from an aggressive diagnostic workup (e.g. X-ray or bronchoscopy) and a liberate use of prophylactic antibiotic treatment for potential aspiration pneumonitis upon admission to the ICU.

**Acknowledgements:** The authors like to thank Dr. Thomas Koschny for assistance and support of graphic data representation.

**Conflict of interests:** none

## Figure captions

**Figure 1.** Composition of the study cohort. From the initial cohort of 458 atraumatic patients with acute alcohol monointoxication, 47 admissions were excluded due to missing data or severe interfering medical conditions, resulting in 411 admissions eligible for the final analysis. In 3 cases 2 different exclusion criteria were present.

**Figure 2.** Blood alcohol levels at admission are plotted as a function of age, separately for n=294 admission of male (□) and n=117 admissions of female (◆) patients.

**Figure 3.** Correlation between the first GCS score at prehospital presentation and the second GCS score at hospital admission (n=336 complete data sets). The diagonal represents patients with no change in GCS score during their prehospital treatment. The number of patients is inscribed within each dot and reflected by the dot size. A change of  $\pm 2$  points between first and second GCS score was considered clinically irrelevant (unfilled circles). Patients with changes of their GCS score of 3 or more points are considered clinically relevant (filled circles).

**Figure 4.** Correlation between first GCS score and blood alcohol level for male (□) and female (◆) patients.

**Figure 5.** Distribution of the first GCS score (A) and age (B) for patients without aspiration versus proven aspiration, presented as box plots.

1  
2  
3  
4  
5  
6  
7  
8  
9  
10  
11  
12  
13  
14  
15  
16  
17  
18  
19  
20  
21  
22  
23  
24  
25  
26  
27  
28  
29  
30  
31  
32  
33  
34  
35  
36  
37  
38  
39  
40  
41  
42  
43  
44  
45  
46  
47  
48  
49  
50  
51  
52  
53  
54  
55  
56  
57  
58  
59  
60

**Ethics Statement**

The study was approved by the local ethics board of Heidelberg University (S-329/2013)

For peer review only



## References

1. Verelst S, Moonen PJ, Desruelles D *et al.* Emergency department visits due to alcohol intoxication: characteristics of patients and impact on the emergency room. *Alcohol Alcohol* 2012;**47**:433-8.
2. Pirmohamed M, Brown C, Owens L *et al.* The burden of alcohol misuse on an inner-city general hospital. *QJM* 2000;**93**:291-5.
3. Myran DT, Hsu AT, Smith G *et al.* Rates of emergency department visits attributable to alcohol use in Ontario from 2003 to 2016: a retrospective population-level study. *CMAJ* 2019;**191**:E804-E10.
4. Krumpke PE, Cummiskey JM, Lillington GA. Alcohol and the respiratory tract. *Med Clin North Am* 1984;**68**:201-19.
5. Vonghia L, Leggio L, Ferrulli A *et al.* Acute alcohol intoxication. *Eur J Intern Med* 2008;**19**:561-7.
6. Gentleman D, Dearden M, Midgley S *et al.* Guidelines for resuscitation and transfer of patients with serious head injury. *BMJ* 1993;**307**:547-52.
7. Duncan R, Thakore S. Decreased Glasgow Coma Scale score does not mandate endotracheal intubation in the emergency department. *J Emerg Med* 2009;**37**:451-5.
8. Sauter TC, Ronz K, Hirschi T *et al.* Intubation in acute alcohol intoxications at the emergency department. *Scand J Trauma Resusc Emerg Med* 2020;**28**:11.
9. Donald C, Duncan R, Thakore S. Predictors of the need for rapid sequence intubation in the poisoned patient with reduced Glasgow coma score. *Emerg Med J* 2009;**26**:510-2.
10. Bernhard M, Bein B, Böttiger BW *et al.* Handlungsempfehlung zur prähospitalen Notfallnarkose beim Erwachsenen. *Notfall + Rettungsmedizin* 2015;**18**:395-412.
11. Luckscheiter A, Lohs T, Fischer M *et al.* [Preclinical emergency anesthesia : A current state analysis from 2015-2017]. *Anaesthesist* 2019;**68**:270-81.
12. Eizadi-Mood N, Saghaei M, Alfred S *et al.* Comparative evaluation of Glasgow Coma Score and gag reflex in predicting aspiration pneumonitis in acute poisoning. *J Crit Care* 2009;**24**:470 e9-15.
13. Montassier E, Le Conte P. Aspiration pneumonia and severe self-poisoning: about the necessity of early airway management. *J Emerg Med* 2012;**43**:122-3.
14. Orso D, Vetrugno L, Federici N *et al.* Endotracheal intubation to reduce aspiration events in acutely comatose patients: a systematic review. *Scand J Trauma Resusc Emerg Med* 2020;**28**:116.
15. Driver BE, Klein LR, Schick AL *et al.* The occurrence of aspiration pneumonia after emergency endotracheal intubation. *Am J Emerg Med* 2018;**36**:193-6.
16. Zehtabchi S, Sinert R, Baron BJ *et al.* Does ethanol explain the acidosis commonly seen in ethanol-intoxicated patients? *Clin Toxicol (Phila)* 2005;**43**:161-6.
17. Tenenbein M. Do you really need that emergency drug screen? *Clin Toxicol (Phila)* 2009;**47**:286-91.
18. Hulse GK, Robertson SI, Tait RJ. Adolescent emergency department presentations with alcohol- or other drug-related problems in Perth, Western Australia. *Addiction* 2001;**96**:1059-67.
19. Romano E, Pollini RA. Patterns of drug use in fatal crashes. *Addiction* 2013;**108**:1428-38.
20. Mick I, Gross C, Lachnit A *et al.* Alcohol-induced impairment in adolescents admitted to inpatient treatment after heavy episodic drinking: effects of age and gender. *J Stud Alcohol Drugs* 2015;**76**:493-7.
21. Tonisson M, Tillmann V, Kuudeberg A *et al.* Plasma glucose, lactate, sodium, and potassium levels in children hospitalized with acute alcohol intoxication. *Alcohol* 2010;**44**:565-71.

- 1  
2  
3 22. Shavit I, Konopnicki M, Winkler K *et al*. Serum glucose and electrolyte levels in alcohol-  
4 intoxicated adolescents on admission to the emergency department: an unmatched case-  
5 control study. *Eur J Pediatr* 2012;**171**:1397-400.  
6  
7 23. Lien D, Mader TJ. Survival from profound alcohol-related lactic acidosis. *J Emerg Med*  
8 1999;**17**:841-6.  
9 24. Shahin H, Gopinath SP, Robertson CS. Influence of alcohol on early Glasgow Coma Scale in  
10 head-injured patients. *J Trauma* 2010;**69**:1176-81; discussion 81.  
11 25. Rundhaug NP, Moen KG, Skandsen T *et al*. Moderate and severe traumatic brain injury:  
12 effect of blood alcohol concentration on Glasgow Coma Scale score and relation to  
13 computed tomography findings. *J Neurosurg* 2015;**122**:211-8.  
14 26. Lange RT, Iverson GL, Brubacher JR *et al*. Effect of blood alcohol level on Glasgow Coma  
15 Scale scores following traumatic brain injury. *Brain Inj* 2010;**24**:919-27.  
16 27. Sperry JL, Gentilello LM, Minei JP *et al*. Waiting for the patient to "sober up": Effect of  
17 alcohol intoxication on glasgow coma scale score of brain injured patients. *J Trauma*  
18 2006;**61**:1305-11.  
19 28. Stuke L, Diaz-Arrastia R, Gentilello LM *et al*. Effect of alcohol on Glasgow Coma Scale in head-  
20 injured patients. *Ann Surg* 2007;**245**:651-5.  
21 29. Binner C, Selinski S, Barysch MJ *et al*. Munich Oktoberfest experience: remarkable impact of  
22 sex and age in ethanol intoxication. *Arch Toxicol* 2008;**82**:933-9.  
23 30. Moulton C, Pennycook AG. Relation between Glasgow coma score and cough reflex. *Lancet*  
24 1994;**343**:1261-2.  
25 31. Moulton C, Pennycook A, Makower R. Relation between Glasgow coma scale and the gag  
26 reflex. *BMJ* 1991;**303**:1240-1.  
27 32. Adnet F, Baud F. Relation between Glasgow Coma Scale and aspiration pneumonia. *Lancet*  
28 1996;**348**:123-4.  
29 33. Vadeboncoeur TF, Davis DP, Ochs M *et al*. The ability of paramedics to predict aspiration in  
30 patients undergoing prehospital rapid sequence intubation. *J Emerg Med* 2006;**30**:131-6.  
31  
32  
33  
34  
35  
36  
37  
38  
39  
40  
41  
42  
43  
44  
45  
46  
47  
48  
49  
50  
51  
52  
53  
54  
55  
56  
57  
58  
59  
60

## Statements

a. Funding Statement: This research received no specific grant from any funding agency in the public, commercial or not-for-profit sectors.

b. Competing Interest: None declared.

c. Data Sharing Statement: Data may be obtained from a third party and are not publicly available

d. Contributorship Statement

MC, AH, EP, RK planned the study and performed the data acquisition. Statistical analysis was performed by TB. Manuscript writing and editing was performed by MC, AH, EP, TB, RK. The manuscript was submitted by MC.

e. Word count

3.742

1 **Figure 1**  
2  
3  
4

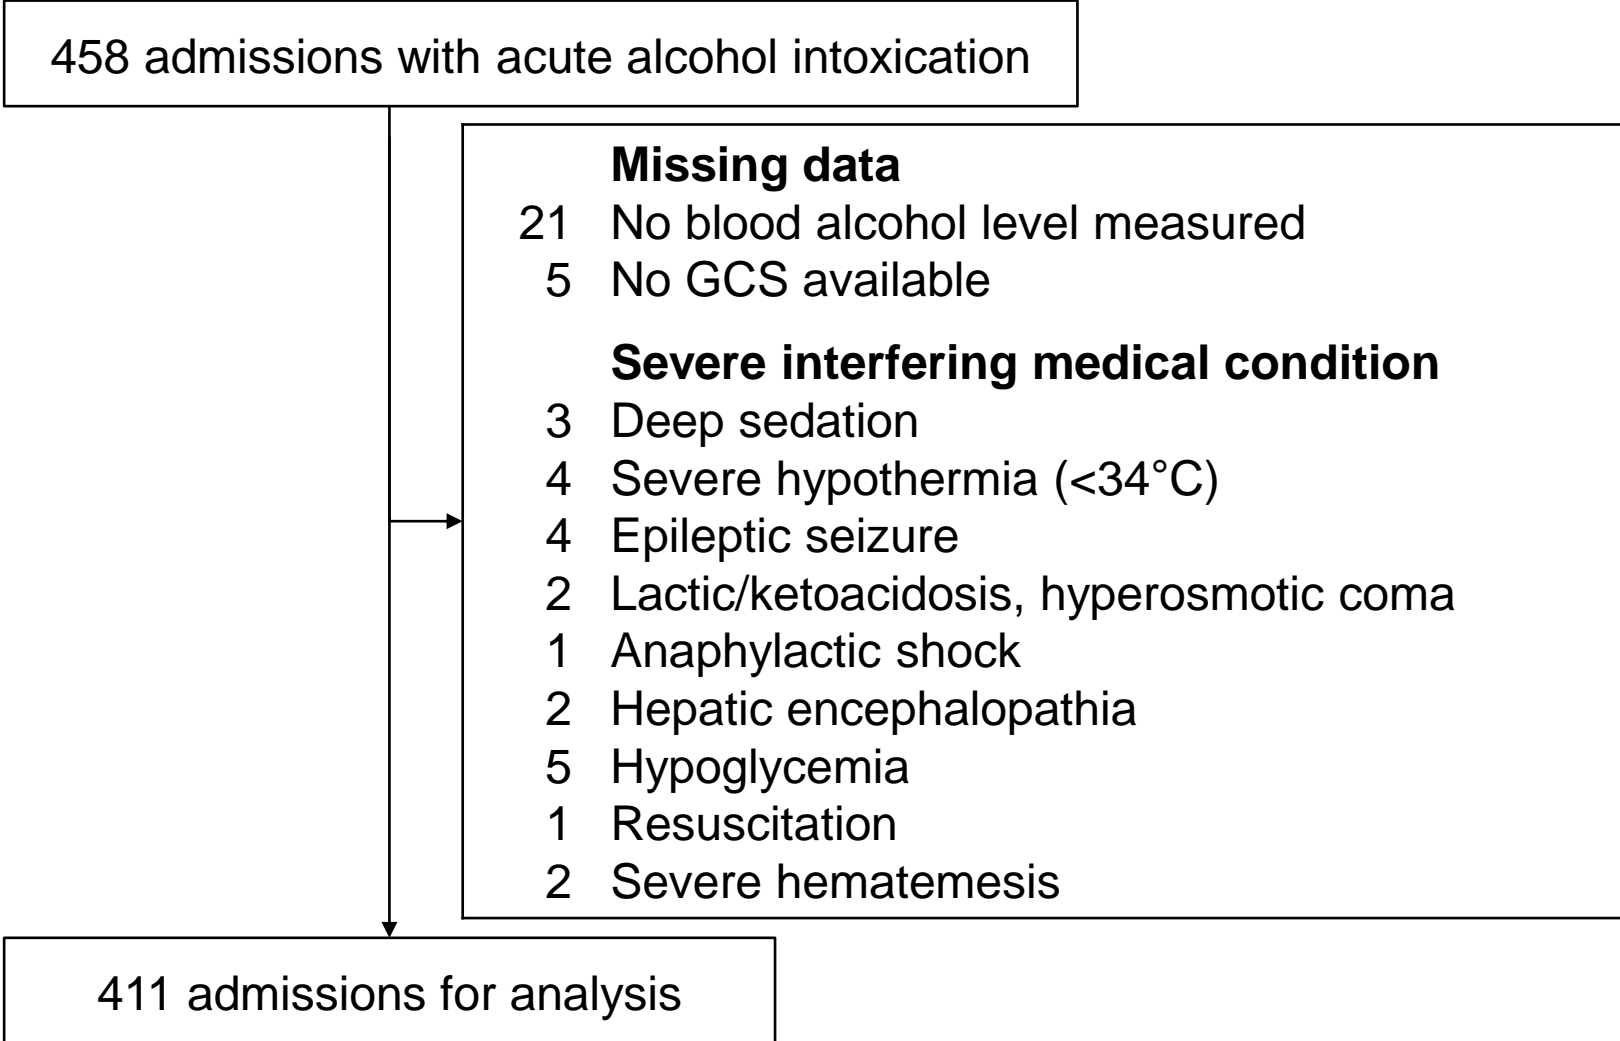

Figure 2

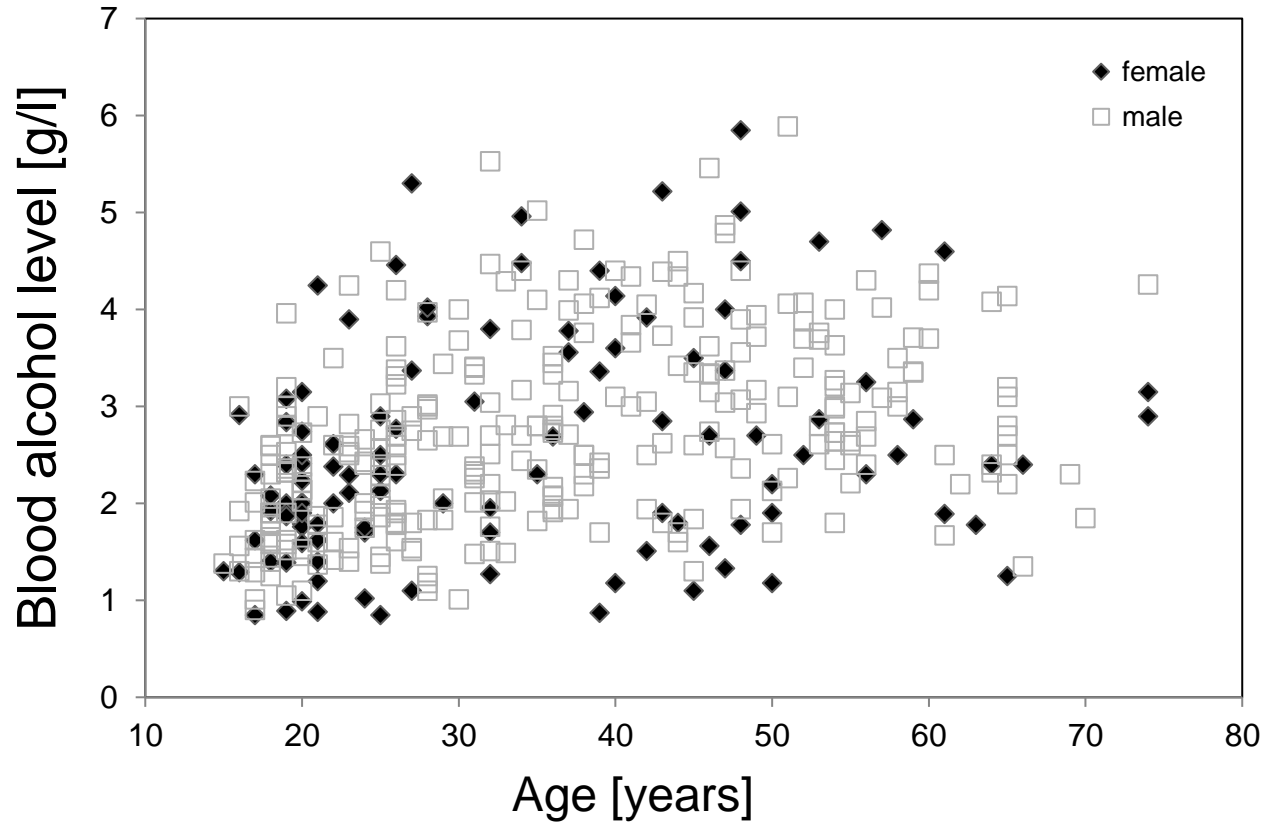

Figure 3

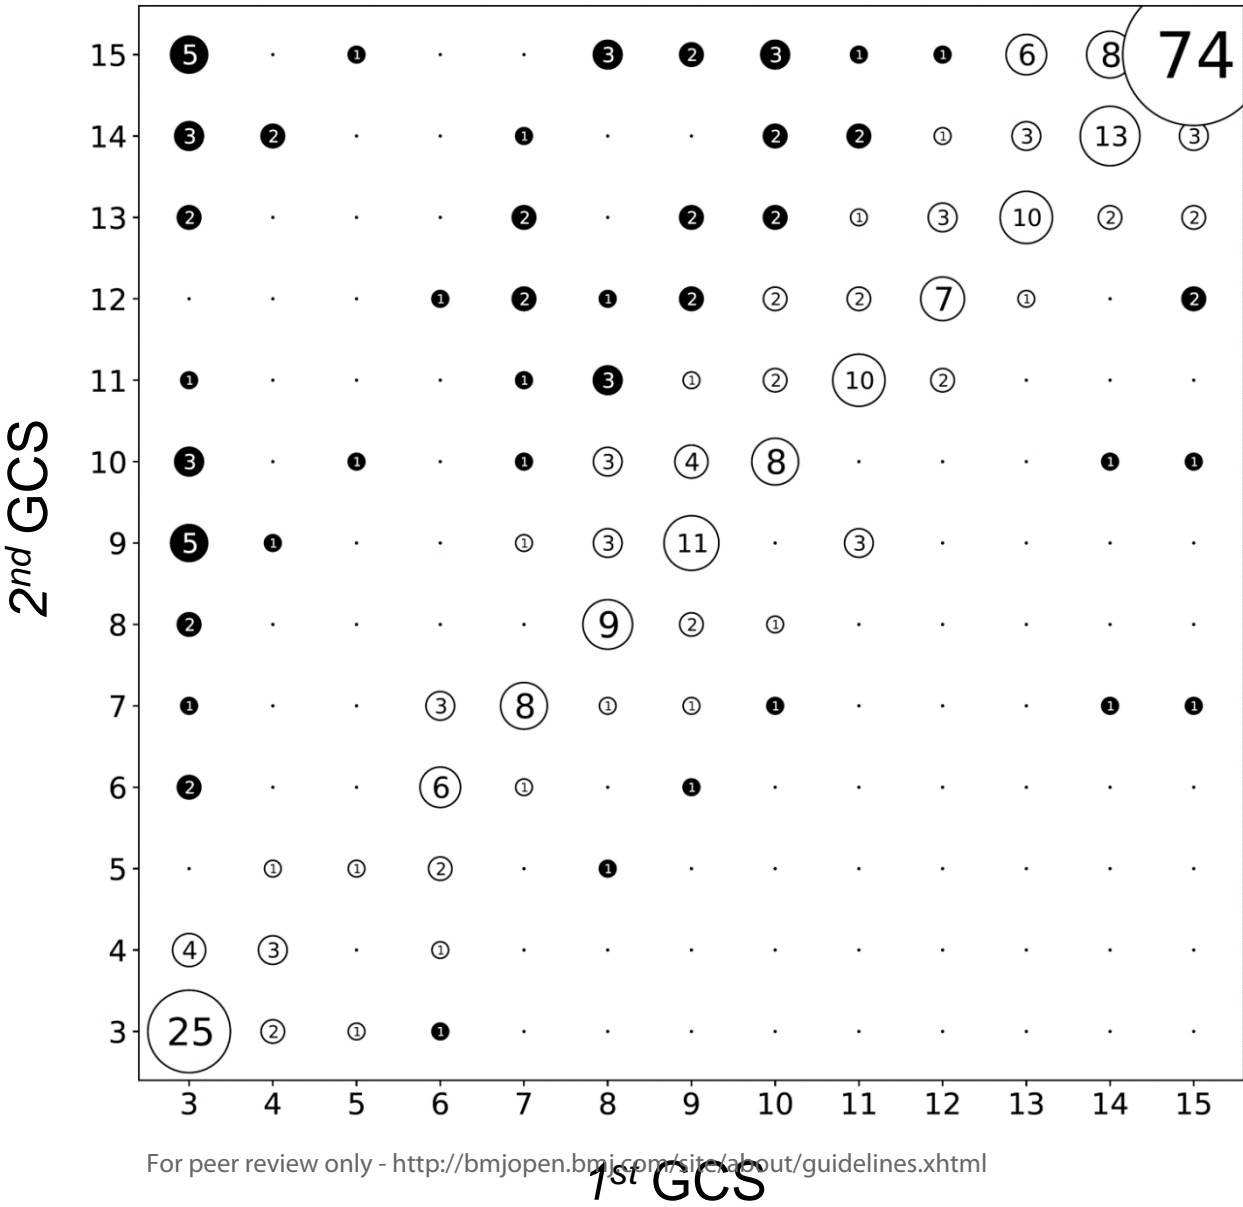

1 **Figure 4**  
2  
3  
4  
5  
6  
7  
8

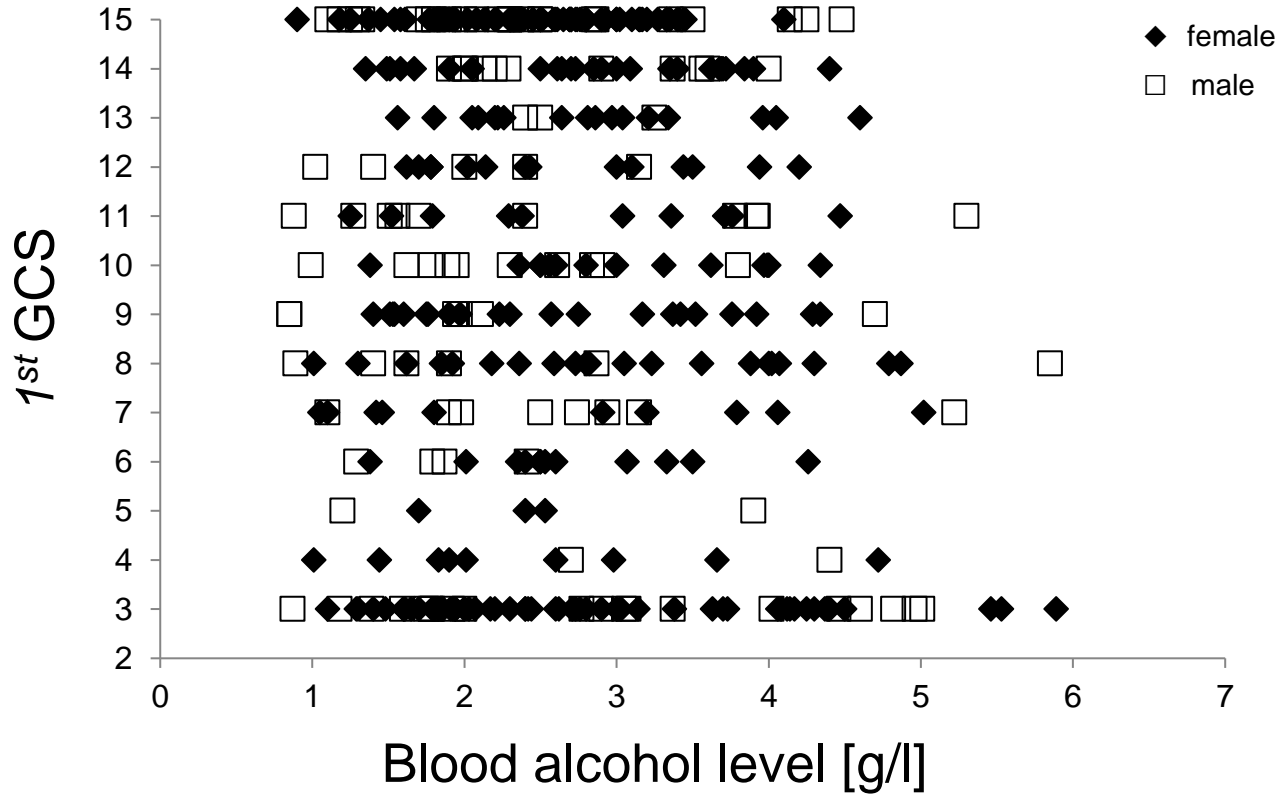

# Figure 5

1  
2  
3  
4  
5  
6  
7  
8  
9  
10  
11  
12  
13  
14  
15  
16  
17  
18  
19  
20  
21  
22  
23  
24  
25  
26  
27  
28  
29  
30  
31  
32  
33  
34  
35  
36  
37  
38  
39  
40  
41

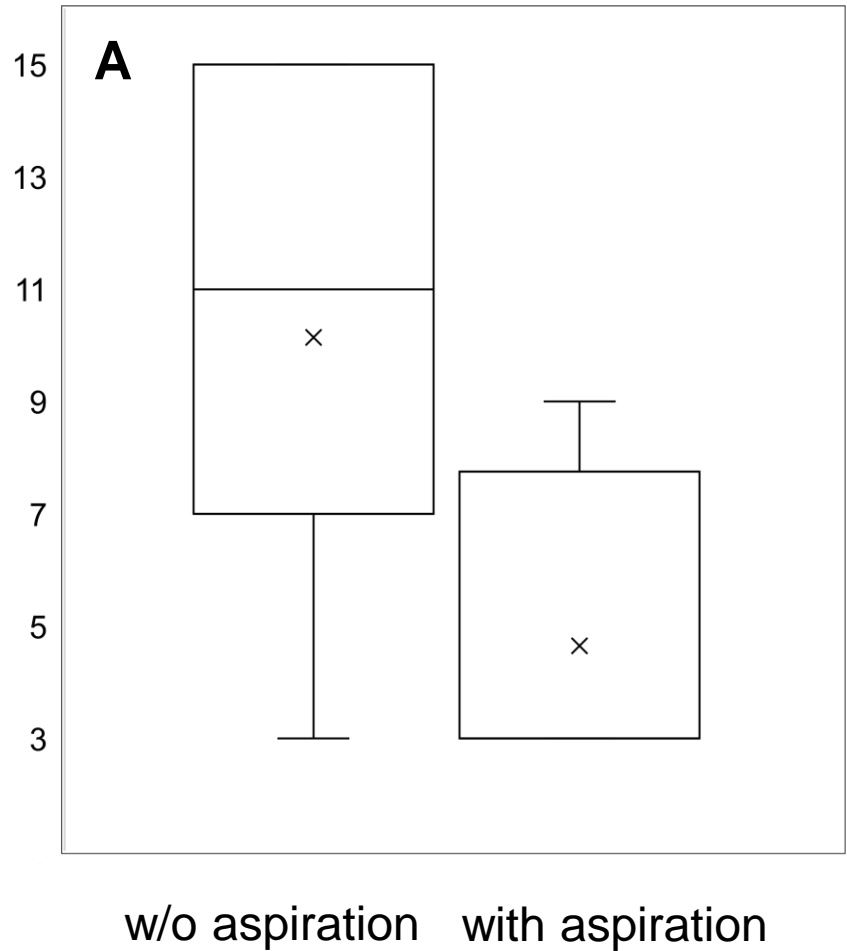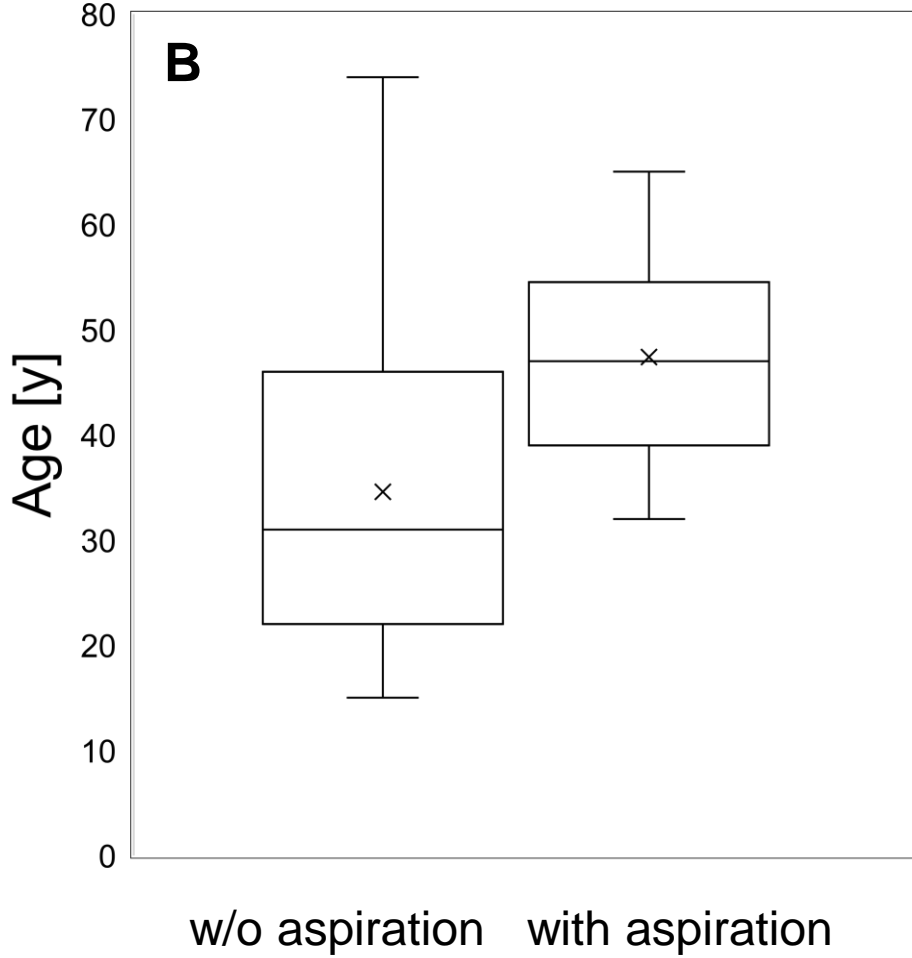



STROBE Statement—Checklist of items that should be included in reports of *cohort studies*

|                              | Item No | Recommendation                                                                                                                                                                                                                                                                                                         | Page No     |
|------------------------------|---------|------------------------------------------------------------------------------------------------------------------------------------------------------------------------------------------------------------------------------------------------------------------------------------------------------------------------|-------------|
| <b>Title and abstract</b>    | 1       | (a) Indicate the study's design with a commonly used term in the title or the abstract                                                                                                                                                                                                                                 | 1           |
|                              |         | (b) Provide in the abstract an informative and balanced summary of what was done and what was found                                                                                                                                                                                                                    | 2           |
| <b>Introduction</b>          |         |                                                                                                                                                                                                                                                                                                                        |             |
| Background/rationale         | 2       | Explain the scientific background and rationale for the investigation being reported                                                                                                                                                                                                                                   | 4           |
| Objectives                   | 3       | State specific objectives, including any prespecified hypotheses                                                                                                                                                                                                                                                       | 4           |
| <b>Methods</b>               |         |                                                                                                                                                                                                                                                                                                                        |             |
| Study design                 | 4       | Present key elements of study design early in the paper                                                                                                                                                                                                                                                                | 5           |
| Setting                      | 5       | Describe the setting, locations, and relevant dates, including periods of recruitment, exposure, follow-up, and data collection                                                                                                                                                                                        | 5           |
| Participants                 | 6       | (a) Give the eligibility criteria, and the sources and methods of selection of participants. Describe methods of follow-up<br>(b) For matched studies, give matching criteria and number of exposed and unexposed                                                                                                      | 5           |
| Variables                    | 7       | Clearly define all outcomes, exposures, predictors, potential confounders, and effect modifiers. Give diagnostic criteria, if applicable                                                                                                                                                                               | 5           |
| Data sources/<br>measurement | 8*      | For each variable of interest, give sources of data and details of methods of assessment (measurement). Describe comparability of assessment methods if there is more than one group                                                                                                                                   | 5           |
| Bias                         | 9       | Describe any efforts to address potential sources of bias                                                                                                                                                                                                                                                              | 9           |
| Study size                   | 10      | Explain how the study size was arrived at                                                                                                                                                                                                                                                                              | 5           |
| Quantitative variables       | 11      | Explain how quantitative variables were handled in the analyses. If applicable, describe which groupings were chosen and why                                                                                                                                                                                           | 6           |
| Statistical methods          | 12      | (a) Describe all statistical methods, including those used to control for confounding<br>(b) Describe any methods used to examine subgroups and interactions<br>(c) Explain how missing data were addressed<br>(d) If applicable, explain how loss to follow-up was addressed<br>(e) Describe any sensitivity analyses | 6<br>8<br>8 |
| <b>Results</b>               |         |                                                                                                                                                                                                                                                                                                                        |             |
| Participants                 | 13*     | (a) Report numbers of individuals at each stage of study—eg numbers potentially eligible, examined for eligibility, confirmed eligible, included in the study, completing follow-up, and analysed<br>(b) Give reasons for non-participation at each stage<br>(c) Consider use of a flow diagram                        | 8<br>9<br>8 |
| Descriptive data             | 14*     | (a) Give characteristics of study participants (eg demographic, clinical, social) and information on exposures and potential confounders<br>(b) Indicate number of participants with missing data for each variable of interest<br>(c) Summarise follow-up time (eg, average and total amount)                         | 8<br>8      |
| Outcome data                 | 15*     | Report numbers of outcome events or summary measures over time                                                                                                                                                                                                                                                         | 8-10        |

|    |                          |                                                                                                                  |                                                                                                                                                                                                              |       |
|----|--------------------------|------------------------------------------------------------------------------------------------------------------|--------------------------------------------------------------------------------------------------------------------------------------------------------------------------------------------------------------|-------|
| 1  | Main results             | 16                                                                                                               | (a) Give unadjusted estimates and, if applicable, confounder-adjusted estimates and their precision (eg, 95% confidence interval). Make clear which confounders were adjusted for and why they were included | 8-10  |
| 2  |                          | (b) Report category boundaries when continuous variables were categorized                                        |                                                                                                                                                                                                              |       |
| 3  |                          | (c) If relevant, consider translating estimates of relative risk into absolute risk for a meaningful time period |                                                                                                                                                                                                              |       |
| 4  | Other analyses           | 17                                                                                                               | Report other analyses done—eg analyses of subgroups and interactions, and sensitivity analyses                                                                                                               | 9     |
| 5  | <b>Discussion</b>        |                                                                                                                  |                                                                                                                                                                                                              |       |
| 6  | Key results              | 18                                                                                                               | Summarise key results with reference to study objectives                                                                                                                                                     | 15    |
| 7  | Limitations              | 19                                                                                                               | Discuss limitations of the study, taking into account sources of potential bias or imprecision. Discuss both direction and magnitude of any potential bias                                                   | 14    |
| 8  | Interpretation           | 20                                                                                                               | Give a cautious overall interpretation of results considering objectives, limitations, multiplicity of analyses, results from similar studies, and other relevant evidence                                   | 11-15 |
| 9  | Generalisability         | 21                                                                                                               | Discuss the generalisability (external validity) of the study results                                                                                                                                        | 14    |
| 10 | <b>Other information</b> |                                                                                                                  |                                                                                                                                                                                                              |       |
| 11 | Funding                  | 22                                                                                                               | Give the source of funding and the role of the funders for the present study and, if applicable, for the original study on which the present article is based                                                | 21    |

\*Give information separately for exposed and unexposed groups.

**Note:** An Explanation and Elaboration article discusses each checklist item and gives methodological background and published examples of transparent reporting. The STROBE checklist is best used in conjunction with this article (freely available on the Web sites of PLoS Medicine at <http://www.plosmedicine.org/>, Annals of Internal Medicine at <http://www.annals.org/>, and Epidemiology at <http://www.epidem.com/>). Information on the STROBE Initiative is available at <http://www.strobe-statement.org>.

# BMJ Open

## Aspiration risk in relation to Glasgow Coma Scale score and clinical parameters in patients with severe acute alcohol intoxication: a single-centre, retrospective study

|                                 |                                                                                                                                                                                                                                                                                                                                                                                                                                                                                                                                                                     |
|---------------------------------|---------------------------------------------------------------------------------------------------------------------------------------------------------------------------------------------------------------------------------------------------------------------------------------------------------------------------------------------------------------------------------------------------------------------------------------------------------------------------------------------------------------------------------------------------------------------|
| Journal:                        | <i>BMJ Open</i>                                                                                                                                                                                                                                                                                                                                                                                                                                                                                                                                                     |
| Manuscript ID                   | bmjopen-2021-053619.R2                                                                                                                                                                                                                                                                                                                                                                                                                                                                                                                                              |
| Article Type:                   | Original research                                                                                                                                                                                                                                                                                                                                                                                                                                                                                                                                                   |
| Date Submitted by the Author:   | 19-Sep-2021                                                                                                                                                                                                                                                                                                                                                                                                                                                                                                                                                         |
| Complete List of Authors:       | Conzelmann, Michael; BASF Corporate Health Management, Dept. of Human Toxicology & Health Risk Assessment; Rudolf Boehm Institute of Pharmacology and Toxicology, Postgraduate Study "Toxicology and Environmental Toxicology"<br>Hoidis, Anne; University Hospital Heidelberg, Dept. of Gastroenterology<br>Bruckner, Thomas; University Hospital Heidelberg, Institute for Medical Biometry and Informatics<br>Popp, Erik; University Hospital Heidelberg, Dept. of Anaesthesiology<br>Koschny, Ronald; University Hospital Heidelberg, Dept. of Gastroenterology |
| <b>Primary Subject Heading</b>: | Emergency medicine                                                                                                                                                                                                                                                                                                                                                                                                                                                                                                                                                  |
| Secondary Subject Heading:      | Intensive care                                                                                                                                                                                                                                                                                                                                                                                                                                                                                                                                                      |
| Keywords:                       | Adult intensive & critical care < ANAESTHETICS, Substance misuse < PSYCHIATRY, TOXICOLOGY                                                                                                                                                                                                                                                                                                                                                                                                                                                                           |
|                                 |                                                                                                                                                                                                                                                                                                                                                                                                                                                                                                                                                                     |

SCHOLARONE™  
Manuscripts



I, the Submitting Author has the right to grant and does grant on behalf of all authors of the Work (as defined in the below author licence), an exclusive licence and/or a non-exclusive licence for contributions from authors who are: i) UK Crown employees; ii) where BMJ has agreed a CC-BY licence shall apply, and/or iii) in accordance with the terms applicable for US Federal Government officers or employees acting as part of their official duties; on a worldwide, perpetual, irrevocable, royalty-free basis to BMJ Publishing Group Ltd ("BMJ") its licensees and where the relevant Journal is co-owned by BMJ to the co-owners of the Journal, to publish the Work in this journal and any other BMJ products and to exploit all rights, as set out in our [licence](#).

The Submitting Author accepts and understands that any supply made under these terms is made by BMJ to the Submitting Author unless you are acting as an employee on behalf of your employer or a postgraduate student of an affiliated institution which is paying any applicable article publishing charge ("APC") for Open Access articles. Where the Submitting Author wishes to make the Work available on an Open Access basis (and intends to pay the relevant APC), the terms of reuse of such Open Access shall be governed by a Creative Commons licence – details of these licences and which [Creative Commons](#) licence will apply to this Work are set out in our licence referred to above.

Other than as permitted in any relevant BMJ Author's Self Archiving Policies, I confirm this Work has not been accepted for publication elsewhere, is not being considered for publication elsewhere and does not duplicate material already published. I confirm all authors consent to publication of this Work and authorise the granting of this licence.

1  
2  
3 **Aspiration risk in relation to Glasgow Coma Scale score and clinical parameters in**  
4 **patients with severe acute alcohol intoxication: a single-centre, retrospective study**  
5  
6  
7  
8  
9

10 Michael Conzelmann <sup>1,2</sup>, Anne Hoidis <sup>3</sup>, Thomas Bruckner <sup>4</sup>, Erik Popp <sup>5</sup>, Ronald Koschny <sup>3</sup>  
11  
12  
13

14  
15  
16  
17 <sup>1</sup> Dept. of Human Toxicology & Health Risk Assessment, BASF Corporate Health  
18 Management, Carl-Bosch-Str. 38, D-67056 Ludwigshafen am Rhein, Germany  
19

20  
21 <sup>2</sup> Postgraduate Study "Toxicology and Environmental Toxicology", Rudolf Boehm Institute  
22 of Pharmacology and Toxicology, University of Leipzig, Haertelstrasse 16-18, 04107  
23 Leipzig, Germany.  
24  
25

26  
27 <sup>3</sup> Dept. of Gastroenterology, University Hospital Heidelberg, INF 410, D-69120 Heidelberg,  
28 Germany  
29

30  
31 <sup>4</sup> Institute for Medical Biometry and Informatics, Heidelberg University Hospital, INF 130.3,  
32 D-69120 Heidelberg, Germany  
33

34  
35 <sup>5</sup> Dept. of Anaesthesiology, University Hospital Heidelberg, INF 420, D-69120 Heidelberg,  
36 Germany  
37  
38  
39  
40

41 ☒ Corresponding author Prof. Dr. med. Ronald Koschny  
42  
43 ☉ Present address Dept. of Internal Medicine  
44 Im Neuenheimer Feld 410  
45 D-69120 Heidelberg, Germany  
46  
47 Email: ronald.koschny@med.uni-heidelberg.de  
48  
49  
50  
51  
52  
53  
54  
55  
56  
57  
58  
59  
60  
Tel.: +49 6221 5637969, Fax: +49 6221 565255

**Abbreviated title:** Aspiration risk in severe acute alcohol intoxication

1  
2  
3 **Key words:** alcohol intoxication, airway management, aspiration, intubation, Glasgow  
4  
5 Coma Scale, protective airway reflex  
6  
7  
8  
9

## 10 11 **Abstract**

12  
13  
14 **Objectives** In alcohol intoxicated patients, the decision for or against airway protection can  
15  
16 be challenging and is often based on the Glasgow Coma Scale (GCS). Primary aim of this  
17  
18 study was to analyse the aspiration risk in relation to the GCS score and clinical parameters  
19  
20 in patients with severe acute alcohol monointoxication. Secondary aim was the association  
21  
22 between the blood alcohol level and the GCS score.  
23

24  
25 **Setting** Single-centre, retrospective study of alcoholised patients admitted to a German  
26  
27 intensive care unit between 2006 and 2020.

28  
29 **Participants** n=411 admissions were eligible for our analysis.

30  
31 **Clinical measures and analysis** The following data were extracted: age, gender,  
32  
33 admission time, blood alcohol level, blood glucose level, initial GCS score, GCS score at  
34  
35 admission, vital signs, clinical signs of aspiration and airway management measures. The  
36  
37 empirical distribution of continuous and categorical data was calculated. Binary multivariable  
38  
39 logistic regression analysis was used to identify possible risk factors for aspiration.  
40

41  
42 **Results** The mean age was 35 years. 72% of the patients were male. The blood alcohol  
43  
44 level (mean 2.7 g/l  $\pm$ 1.0, maximum 5.9 g/l) did not correlate with the GCS score but with the  
45  
46 age of the patient. In univariate analysis, the aspiration risk correlated with blood alcohol  
47  
48 level, age, GCS score, oxygen saturation, respiratory rate, and blood glucose level and was  
49  
50 significantly higher in male patients, upon vomiting, and in patients requiring airway  
51  
52 measures. Aspiration rate was 45% in patients without vs. 6% in patients with preserved  
53  
54 protective reflexes (p=0.0001). In multivariate analysis, only age and GCS score were  
55  
56 significantly associated with the risk of aspiration.  
57  
58  
59  
60

1  
2  
3 **Conclusion** Although in this single-centre, retrospective study the aspiration rate in severe  
4 acute alcohol monointoxicated patients correlates with GCS and protective reflexes, the  
5 decision for endotracheal intubation might rather be based on the presence of different risk  
6 factors for aspiration.  
7  
8  
9  
10

### 11 12 13 14 15 16 **Strengths and limitations of this study**

- 17 • We provide an analysis of the so far largest homogenous cohort of alcohol  
18 monointoxicated non-traumatic ICU patients for risk factors of aspiration.  
19
- 20 • Since the aspiration pneumonia could have developed after the discharge of the  
21 patient from the hospital in cases with short-time in-hospital care, we might have  
22 missed some aspiration events.  
23
- 24 • Since a minority of patients were admitted to the hospital more than once, we  
25 analysed admissions instead of patients as single events.  
26
- 27 • Within our cohort of limited sample size we identified risk factors for aspiration which  
28 could help to guide clinical diagnostic and therapeutic work up.  
29
- 30 • However, due to the retrospective nature of this single-centre study, we cannot  
31 provide direct clinical recommendations.  
32  
33  
34  
35  
36  
37  
38  
39  
40  
41  
42  
43  
44  
45  
46  
47  
48  
49  
50  
51  
52  
53  
54  
55  
56  
57  
58  
59  
60

## Introduction

Patients with acute ethanol intoxication frequently require medical treatment, observation and diagnostics by paramedics, emergency physicians, emergency departments as well as intensive care units (ICU) [1]. Up to 12% of the attendances at the emergency department of an inner-city hospital in the United Kingdom were alcohol-related, mostly due to acute intoxication [2]. In Ontario, Canada, 5.1% of visits to the emergency department were attributable to alcohol use [3]. Besides respiratory depression, an elevated risk of aspiration due to impaired consciousness after alcohol consumption can cause life-threatening complications [4, 5]. In trauma patients with impaired consciousness, a GCS score of 8 or less is widely accepted as an indication for an airway protection by endotracheal intubation [6]. Although alcohol intoxicated patients often present with impaired consciousness and a GCS score of less than 8, the reported intubation rate of 0-2.3% is low compared to the overall intubation rate of 3-5% in prehospital emergencies [7-11]. The clinical benefit of intubating intoxicated patients with a GCS score  $\leq 8$  in order to prevent aspiration is still controversially discussed [8, 9, 12-14]. Apart from adverse events like hypotension and cardiac arrest, prehospital intubation bears a risk of approx. 8% for the development of an intubation-related aspiration pneumonia [15]. Therefore, the risk-benefit ratio of prehospital invasive airway measures needs to be carefully considered. Differences of aspiration and intubation rates between mixed intoxications and alcohol monointoxications suggest that these clinical conditions might not be comparable regarding the necessity for airway protection. In contrast to mixed intoxication, data regarding airway impairment in acute alcohol monointoxication are very scarce.

The primary aim of this study was to search for risk factors for aspiration in adolescent and adult atraumatic patients who required admission to our intensive care unit due to severe acute alcohol monointoxication. As a secondary aim, we analysed the association between the blood alcohol level and the GCS score.



## Material and Methods

### Study Design and Population

For this retrospective study, all patients who had been admitted to the intensive care unit of the Department of Gastroenterology at the University Hospital of Heidelberg between January 2006 and December 2020 were screened for acute mono-intoxication with alcohol (ethanol). The study was approved by the local ethics board of Heidelberg University (S-329/2013), which waived the need for an informed consent by the patient. Mixed intoxication was assumed when reported by the patient or relatives or in case of indicative prehospital scenarios (empty blisters, visible injection signs) or positive toxicology screening upon admission to the hospital (see "Measurements"). These patients were excluded from the study. Alcohol intoxication was defined as impaired consciousness due to a blood alcohol level  $\geq 0.8$  g/l, which is the legal definition for alcohol intoxication in many countries [16]. Patients with missing data regarding blood alcohol level or GCS score were excluded, as well as patients with severe comorbidities or medical conditions interfering with consciousness, airway situation, aspiration risk or breathing rate. Details of excluded patients are given in Figure 1. Deep therapeutic sedation was defined as sedation by the emergency physician resulting in an iatrogenic GCS score  $\leq 8$ . Severe hypothermia was defined by a core temperature  $\leq 34$  °C. Hypoglycemia was defined as any blood glucose level  $< 65$  mg/dl as the lower level of normal regarding our standard point-of-care-testing (POCT) devices. Concomitant use of common medication at therapeutic doses was permitted. The following data were extracted from the medical records: age, gender, admission time, blood alcohol level, blood glucose level, initial GCS score (1<sup>st</sup> GCS), GCS score at admission to the hospital (2<sup>nd</sup> GCS), initial (prehospital) vital signs (systolic blood pressure, heart rate, breathing rate, peripheral capillary oxygen saturation (SpO<sub>2</sub>)), clinical and prehospital signs of aspiration and airway management measures. When patients were prehospitally intubated, only the first GCS score before intubation was recorded, since the second GCS score was narcosis-induced (usually GCS score=3). Aspiration was rated

1  
2  
3 positive if proven by bronchoscopy or if clinical suspicion was supported by at least one of  
4 the following factors: coughing up aspirate, coarse crackles on auscultation, new opacities  
5 on chest x-ray, development of fever or laboratory signs of inflammation (CRP, leukocytosis)  
6 on chest x-ray, development of fever or laboratory signs of inflammation (CRP, leukocytosis)  
7 without other overt reasons. Patients without clinical signs of aspiration or normal  
8 bronchoscopy were rated negative.  
9  
10  
11  
12  
13  
14  
15  
16

## 17 **Measurements**

18  
19 Except for prehospital measurements of blood glucose levels by point-of-care-testing  
20 (POCT) according to the emergency medical service (EMS), blood samples were obtained  
21 immediately after the patient's admission to our hospital for venous blood gas analysis  
22 (RAPIDLab 1200, Siemens Healthcare Diagnostics, Eschborn, Germany), measurement of  
23 blood alcohol level and standard laboratory tests including glucose. When indicated by the  
24 patient's history or clinical data, a qualitative urine toxicology screen (Triage 8 Drugs of  
25 Abuse Panel, Alere Diagnostics, Cologne, Germany) was performed to exclude mixed  
26 intoxications. This test detects the following components: amphetamine, barbiturates,  
27 benzodiazepines, cocaine, methadone, opiates, tetrahydrocannabinol (THC), and tricyclic  
28 antidepressants. Due to the low specificity, sensitivity and clinical benefit, urine toxicology  
29 test was not performed on a regular basis [17].  
30  
31  
32  
33  
34  
35  
36  
37  
38  
39  
40  
41  
42  
43  
44  
45  
46

## 47 **Statistical Analysis**

48  
49 Data entry was performed with help of Microsoft Excel (Version 14.0), for the statistical  
50 analysis SAS Version 9.4 WIN (SAS Institute GmbH, Heidelberg, Germany) was used. The  
51 empirical distribution of continuous data was described with mean, standard deviation and  
52 range, in case of categorical data with absolute and relative frequencies. Spearman's  
53 correlation coefficient was calculated to describe associations between blood alcohol level  
54  
55  
56  
57  
58  
59  
60

1  
2  
3 and laboratory values. Possible differences between patients with and without aspiration  
4 were tested with t-test for continuous data and chi-square-tests for categorical data. Binary  
5 multivariable logistic regression analysis was used to find possible risk factors for aspiration.  
6  
7 Statistical graphics were used to visualise the findings.  
8  
9  
10  
11  
12  
13  
14

### 15 **Patient and Public Involvement**

16  
17  
18 No patient involved.  
19  
20  
21  
22  
23  
24  
25  
26  
27  
28  
29  
30  
31  
32  
33  
34  
35  
36  
37  
38  
39  
40  
41  
42  
43  
44  
45  
46  
47  
48  
49  
50  
51  
52  
53  
54  
55  
56  
57  
58  
59  
60

## Results

A total of n=411 admissions to our intensive care unit for acute alcohol monointoxication comprising n=360 different patients were eligible for our analysis. The baseline characteristics of the enrolled patients and their vital parameters are listed in Table 1.

**Table 1** Baseline characteristics of the study population at admission

|                                                                                             |                         |
|---------------------------------------------------------------------------------------------|-------------------------|
| <b>Total number of admissions</b>                                                           | 411                     |
| <b>Number of different patients</b>                                                         | 360                     |
| <b>Patients with more than 1 admission</b>                                                  | 33                      |
| Patients with 2 admissions                                                                  | 21                      |
| Patients with 3 admissions                                                                  | 7                       |
| Patients with 4 admissions                                                                  | 4                       |
| Patients with 5 admissions                                                                  | 1                       |
| <b>Gender, males/females (%)</b>                                                            | 294/117 (72%/28%)       |
| <b>Age, mean <math>\pm</math>SD, (range) [y]</b>                                            | 35 $\pm$ 15 (15-74)     |
| <b>Blood alcohol level, mean <math>\pm</math>SD, (range) [g/l]</b>                          | 2.7 $\pm$ 1.0 (0.9-5.9) |
| <b>Peripheral oxygen saturation (SpO<sub>2</sub>), mean <math>\pm</math>SD, (range) [%]</b> | 96 $\pm$ 6 (47-100)     |
| <b>Heart rate, mean <math>\pm</math>SD (range) [bpm]</b>                                    | 92 $\pm$ 20 (35-180)    |
| <b>Systolic blood pressure, mean <math>\pm</math>SD (range) [mmHg]</b>                      | 121 $\pm$ 22 (70-200)   |
| <b>Respiratory rate, mean <math>\pm</math>SD (range) [1/min]</b>                            | 15 $\pm$ 5 (0-35)       |

The mean blood alcohol level did not significantly differ between male (2.7 $\pm$ 1.0 g/l) and female (2.5 $\pm$ 1.1 g/l) patients (p=0.132). The maximum blood alcohol level was 5.9 g/l and 5.9 g/l in male and female patients, respectively. In Figure 2, the blood alcohol levels are shown according to age and gender. The blood alcohol level strongly correlated with patient's age (r=0.43, p<0.0001) in the total population, as well as in male (r=0.46, p<0.0001) and female patients (r=0.33, p=0.003).

1  
2  
3 In order to analyse the fluctuating consciousness in acute alcohol intoxication, we compared  
4 the first GCS score of the patient upon arrival of the emergency team with the second GCS  
5 score at admission to the hospital approximately 30-60 minutes later. The median GCS  
6 score improved from 10 to 13 between prehospital presentation and admission to the ICU.  
7  
8 Figure 3 visualises the strong correlation between the first and second GCS score ( $r=0.77$ ,  
9  $p<0.0001$ ). Dots on the diagonal line correspond to patients with identical first and second  
10 GCS scores. We considered a change of  $\pm 3$  GCS points ( $\Delta\text{GCS}$ ) as clinically relevant. Most  
11 patients ( $n=258$ , 79%) did not show a relevant change of the GCS score ( $-2 \leq \Delta\text{GCS} \leq +2$ ).  
12  
13 While  $n=61$  admissions (19%) demonstrated an improvement of their consciousness level  
14 during their transport to the hospital ( $\Delta\text{GCS}$  score  $\geq +3$ ), only  $n=10$  patients (3%) showed a  
15 relevant deterioration ( $\Delta\text{GCS}$  score  $\leq -3$ ).  
16  
17

18  
19 To rule out any bias due to mixed GCS records (i.e. pooled first and second GCS scores), all  
20 following analyses regarding GCS scores were performed with the first GCS score only. The  
21 median first GCS score did not differ between male and female patients (10 vs. 10,  
22  $p=0.864$ ). Blood alcohol levels did neither correlate with the initial GCS score in the general  
23 population ( $r=-0.05$ ,  $p=0.279$ ), nor for male ( $r=-0.05$ ,  $p=0.331$ ) or female ( $r=-0.04$ ,  $p=0.673$ )  
24 patients. Nevertheless, very high blood alcohol levels ( $>5$  g/l) were measured only in  
25 patients with a first GCS score  $\leq 11$  (Figure 4). The highest blood alcohol levels of 5.9 and  
26 5.9 g/l were found in 2 patients with a GCS score of 3 and 8, respectively.  
27  
28

29  
30 Within the total population of  $n=411$  patients, aspiration was found in  $n=21$  (5%). Aspiration  
31 was diagnosed by a positive bronchoscopy in  $n=5$  (24%) of these patients. In the remaining  
32  $n=16$  patients, diagnosis of aspiration was based on the presence of at least one of the  
33 following criteria: coarse crackles on auscultation ( $n=9$ ), new opacities on chest x-ray ( $n=6$ ),  
34 development of fever or laboratory signs of inflammation ( $n=6$ ). In order to identify risk  
35 factors for aspiration in alcohol intoxicated patients, we compared the cohorts with and  
36 without aspiration regarding demographic characteristics, vital signs, blood alcohol level,  
37  
38  
39  
40  
41  
42  
43  
44  
45  
46  
47  
48  
49  
50  
51  
52  
53  
54  
55  
56  
57  
58  
59  
60

1  
2  
3 blood glucose level and airway management. In univariate analysis of continuous risk factors  
4 for aspiration, patients with aspiration were significantly older (mean age 47 vs. 35 years),  
5 had a higher blood alcohol level (mean 3.4 vs. 2.6 g/l), a lower first GCS score (median 3 vs.  
6 11), a lower peripheral oxygen saturation (SpO<sub>2</sub>, mean 90 vs. 96%), a lower respiration rate  
7 (mean 13/min vs. 15/min), and a higher blood glucose level (139 vs. 109 mg/dl) (Table 2).  
8  
9  
10  
11  
12  
13  
14  
15  
16  
17  
18  
19  
20  
21  
22  
23  
24  
25  
26  
27  
28  
29  
30  
31  
32  
33  
34  
35  
36  
37  
38  
39  
40  
41  
42  
43  
44  
45  
46  
47  
48  
49  
50  
51  
52  
53  
54  
55  
56  
57  
58  
59  
60

For peer review only

**Table 2** Univariate analysis of continuous risk factors for aspiration

| <b>Parameter</b>                      | <b>Patients without aspiration</b><br>Mean $\pm$ SD (range) | <b>Eligible patients</b> | <b>Patients with aspiration</b><br>Mean $\pm$ SD (range) | <b>Eligible patients</b> | <b>p-value</b> |
|---------------------------------------|-------------------------------------------------------------|--------------------------|----------------------------------------------------------|--------------------------|----------------|
| <b>Age [y]</b>                        | 34.6 $\pm$ 14.5 (15-74)                                     | 390                      | 47.4 $\pm$ 9.3 (32-65)                                   | 21                       | <0.0001        |
| <b>Blood alcohol level [g/l]</b>      | 2.6 $\pm$ 1.0 (0.9-5.9)                                     | 390                      | 3.4 $\pm$ 1.3 (1.7-5.5)                                  | 21                       | 0.017          |
| <b>Initial GCS score</b>              | 11 (median) $\pm$ 4 (3-15)                                  | 378                      | 3 (median) $\pm$ 2 (3-9)                                 | 20                       | <0.0001        |
| <b>SpO<sub>2</sub> [%]</b>            | 96 $\pm$ 6 (47-100)                                         | 365                      | 90 $\pm$ 8 (73-100)                                      | 21                       | 0.006          |
| <b>Systolic blood pressure [mmHg]</b> | 121 $\pm$ 22 (70-200)                                       | 371                      | 122 $\pm$ 20 (96-160)                                    | 21                       | 0.772          |
| <b>Heart rate [bpm]</b>               | 92 $\pm$ 20 (35-180)                                        | 377                      | 89 $\pm$ 20 (50-120)                                     | 21                       | 0.580          |
| <b>Respiratory rate [1/min]</b>       | 15 $\pm$ 5 (0-35)                                           | 302                      | 13 $\pm$ 3 (8-18)                                        | 19                       | 0.014          |
| <b>Blood glucose level [mg/dl]</b>    | 109 $\pm$ 40 (65-487)                                       | 388                      | 139 $\pm$ 60 (72-335)                                    | 21                       | 0.028          |

1  
2  
3 Furthermore, univariate results of binary risk factors revealed a significantly higher risk for  
4 aspiration for male patients, patients with documented airway measures as listed in Table 3.  
5  
6  
7  
8  
9  
10  
11  
12  
13  
14  
15  
16  
17  
18  
19  
20  
21  
22  
23  
24  
25  
26  
27  
28  
29  
30  
31  
32  
33  
34  
35  
36  
37  
38  
39  
40  
41  
42  
43  
44  
45  
46  
47  
48  
49  
50  
51  
52  
53  
54  
55  
56  
57  
58  
59  
60

For peer review only



**Table 3** Univariate analysis of binary risk factors for aspiration

| Parameter                                                           | Manifestation | Patients without aspiration [%] (n) | Patients with aspiration [%] (n) | Evaluable patients (n) | p-value |
|---------------------------------------------------------------------|---------------|-------------------------------------|----------------------------------|------------------------|---------|
| <b>Gender</b>                                                       | Male          | 93.5 (275)                          | 6.5 (19)                         | 294                    | 0.048   |
|                                                                     | Female        | 98.3 (115)                          | 1.7 (2)                          | 117                    |         |
| <b>Vomiting</b>                                                     | No            | 96.4 (317)                          | 3.7 (12)                         | 329                    | 0.017   |
|                                                                     | Yes           | 89.9 (71)                           | 10.1 (8)                         | 79                     |         |
| <b>Oxygen supply</b>                                                | No            | 99.2 (262)                          | 0.8 (3)                          | 265                    | <0.0001 |
|                                                                     | Yes           | 86.9 (126)                          | 13.1 (19)                        | 145                    |         |
| <b>Guedel tube application</b>                                      | No            | 95.5 (382)                          | 4.5 (18)                         | 400                    | 0.0003  |
|                                                                     | Yes           | 70.0 (7)                            | 30.0 (3)                         | 10                     |         |
| <b>Mask ventilation</b>                                             | No            | 95.8 (383)                          | 4.2 (17)                         | 400                    | <0.0001 |
|                                                                     | Yes           | 60.0 (6)                            | 40.0 (4)                         | 10                     |         |
| <b>Protective airway reflexes (at GCS score <math>\leq</math>8)</b> | No            | 54.6 (12)                           | 45.4 (10)                        | 22                     | 0.0001  |
|                                                                     | Yes           | 94.2 (49)                           | 5.8 (3)                          | 52                     |         |
| <b>Secretion suction</b>                                            | No            | 96.5 (382)                          | 3.5 (14)                         | 396                    | <0.0001 |
|                                                                     | Yes           | 46.1 (6)                            | 53.9 (7)                         | 13                     |         |
| <b>Intubation</b>                                                   | No            | 98.4 (377)                          | 1.6 (7)                          | 384                    | <0.0001 |
|                                                                     | Yes           | 44.4 (12)                           | 55.6 (15)                        | 27                     |         |

1  
2  
3 Intubated patients showed a significantly higher aspiration rate than patient's without  
4 intubation (56% vs. 2%). Since many emergency physicians base their decision for  
5 intubation in patients with a GCS score  $\leq 8$  on the presence or absence of the swallowing  
6 and gag reflex, the presence of these protective reflexes was correlated with the risk of  
7 aspiration. A total of n=152 patients had a first GCS score  $\leq 8$ . Data regarding protective  
8 reflexes were available in n=74 (49%) of these patients. Protective reflexes in patients with  
9 GCS score  $\leq 8$  were present in n=52 (70%), but absent in n=22 (30%). The absence of  
10 protective reflexes was significantly associated with a higher risk of aspiration: 45%  
11 aspiration rate in patients without vs. 6% in patients with protective reflexes (p=0.0001,  
12 Table 3).  
13  
14  
15  
16  
17  
18  
19  
20  
21  
22  
23  
24

25 On multivariate analysis of the risk factors gender, age, blood alcohol level, first GCS score,  
26 and oxygen saturation, only age (OR 1.06) and GCS score (OR 0.71) significantly correlated  
27 with the risk of aspiration (Table 4).  
28  
29  
30  
31  
32  
33  
34

35 **Table 4** Odds ratio estimates in multivariate analysis of risk factors for aspiration.  
36

| Risk factor                 | OR   | 95% confidence limits |       | p-value |
|-----------------------------|------|-----------------------|-------|---------|
| Gender (male versus female) | 3.29 | 0.67                  | 16.03 | 0.141   |
| Age                         | 1.06 | 1.02                  | 1.10  | 0.005   |
| Blood alcohol level         | 1.26 | 0.80                  | 2.00  | 0.320   |
| First GCS score             | 0.71 | 0.60                  | 0.84  | <0.0001 |
| Oxygen saturation           | 0.98 | 0.93                  | 1.03  | 0.397   |

37  
38  
39  
40  
41  
42  
43  
44  
45  
46  
47  
48  
49  
50  
51  
52  
53  
54 Due to the low number of complete data sets, presence of protective reflexes could not be  
55 included in the multivariate analysis. The difference of age and GCS score between  
56 aspirated and non-aspirated patients is visualized as box plots in Figure 5A & B. However, a  
57  
58  
59  
60

1  
2  
3 GCS score=3 had a low sensitivity (60%) and a moderate specificity (83%) for aspiration,  
4  
5 with a positive predictive value (PPV) of only 16% and very high negative predictive value  
6  
7 (NPV) of 98%. Since information on the preservation of protective airway reflexes in these  
8  
9 patients were rather scarce, the PPV and NPV were calculated for a GCS score=3,  
10  
11 irrespective of the gag reflex.  
12  
13  
14  
15  
16  
17  
18  
19  
20  
21  
22  
23  
24  
25  
26  
27  
28  
29  
30  
31  
32  
33  
34  
35  
36  
37  
38  
39  
40  
41  
42  
43  
44  
45  
46  
47  
48  
49  
50  
51  
52  
53  
54  
55  
56  
57  
58  
59  
60

For peer review only

## Discussion

Acute alcohol intoxication constitutes a frequent medical problem with a considerable socio-economic and health care system burden. The demographic analysis of our cohort shows a predominance of young male patients, which is comparable to other demographic studies [18, 19]. However, our ICU cohort showed a younger age distribution than another retrospectively analysed cohort of patients admitted to an emergency department [1]. With a mean alcohol level of 2.7 g/l, our cohort showed higher blood alcohol levels than many other studies [20-23], which might be due to the selection of ICU patients. In contrast to Vereslt et al. [1], a higher age was associated with a higher blood alcohol level in our cohort.

Since the short period of prehospital care of alcoholised patients impedes a relevant alcohol degradation, one would expect – if at all – a deterioration of the GCS between the first patient contact and the admission to the hospital due to an ongoing alcohol resorption in the alimentary tract. However, 19% of our patients showed an improvement of more than 2 GCS score points during their prehospital care, but only 3% of patients showed a relevant deterioration. Overall, we found a strong correlation between the first and second GCS score. The prehospital blood alcohol level is not routinely available to the emergency team. Therefore, we can neither provide data on its kinetics, nor does the clinical decision rely on these data. The GCS score of head injured trauma patients with additional alcohol intoxication also improved between prehospital care and the emergency department [24]. This implies that the measurement time point of the GCS score during the prehospital care should be exactly defined and pooling of GCS data from different phases of care should be avoided. Slight changes in GCS score might not necessarily reflect a clinically relevant change of consciousness level of alcoholised patients. We, therefore, considered only an arbitrarily defined  $\Delta$ GCS of  $\geq 3$  as clinically relevant.

Most data on the influence of alcohol on the GCS score were derived from trauma patients. Some studies showed a correlation between blood alcohol level and GCS score [25], while

1  
2  
3 others did not [26-28]. In our study on non-traumatic alcoholised patients, the blood alcohol  
4 level did not correlate with the GCS score even at a considerably high mean blood alcohol  
5 level of 2.7 g/l. In adolescent patients (13-17 years of age) with rather mild alcohol  
6 intoxication (mean 1.6 g/l), Mick et al. found a significant correlation between the blood  
7 alcohol level and the GCS score [20]. One might speculate that adolescents and younger  
8 adults have not yet undergone habituation to regular alcohol consumption. However, even in  
9 the youngest subgroup (15-25 years) of our study, there was no significant correlation  
10 between blood alcohol level and GCS score (n=136 patients, mean blood alcohol level 2.1  
11 g/l, median GCS score 10, p=0.061).

12  
13  
14  
15  
16  
17  
18  
19  
20  
21  
22  
23 One of the most challenging clinical problems in unconscious alcohol-intoxicated patients is  
24 the decision for or against airway protection by intubation. Many studies were performed in  
25 heterogeneous cohorts of mixed intoxication [7, 9, 29-31], in trauma patients [8, 32] or  
26 without any data on the risk of aspiration [8, 29]. While some authors and recommendations  
27 refer to a GCS score  $\leq 8$  as an indication for intubation in alcohol intoxicated patients, the  
28 association of a low GCS score with a higher risk of aspiration has not been sufficiently  
29 substantiated in these patients. In their prospective observational study, Duncan et al. did  
30 not find a higher rate of aspiration in patients with a GCS score  $\leq 8$  [7]. However, only n=22  
31 of 73 patients had alcohol monointoxication and only n=12 patients of their entire cohort  
32 demonstrated a GCS score  $\leq 8$ . Comparing n=12 intubated (mean GCS score 5.9) with n=14  
33 not-intubated (mean GCS score 5.5) patients with mixed intoxication, Donald et al. did not  
34 detect a difference in laboratory or physiological parameters. However, the aspiration rate  
35 was not analysed [9]. None of the intubated patients had an alcohol intoxication. In patients  
36 with a mixed intoxication, the risk of aspiration pneumonia did not significantly differ between  
37 patients with a GCS score  $\leq 8$  versus a GCS score  $> 8$  [13]. In another prospective study on  
38 n=224 drug-intoxicated patients, there was no correlation between the GCS score and the  
39 risk of aspiration [31]. A GCS score  $\leq 8$  was not considered as essential for an increased risk  
40 of aspiration. However, the aspiration rate in that drug-intoxicated cohort was very high

1  
2  
3 (29%) compared to our study (5%). This indicates that mixed intoxication and alcohol  
4 monointoxication might not be comparable regarding the risk of aspiration.  
5  
6

7  
8 In our study on non-traumatic alcohol-monointoxicated patients, we found a strong  
9 correlation between the GCS score and the risk of aspiration, even in a multivariate  
10 regression model. However, n=133 of the 152 patients (88%) with GCS score  $\leq 8$  did not  
11 aspirate. Thus, even for a GCS score =3 the PPV is too low (16%) to guide the decision for  
12 intubation. However, Sauter et al. described that a GCS score  $\leq 8$  was the main reason for  
13 emergency teams to decide for intubation in intoxicated patients [8]. In our cohort,  
14 emergency physicians – according to their emergency protocols – made a more  
15 differentiated decision for intubation based on GCS score, presence of the gag reflex,  
16 vomiting and the suspicion of aspiration.  
17  
18

19  
20 An alternative parameter to estimate the risk for aspiration is the presence of the gag or  
21 cough reflex. However, in a very small cohort of patients with pharmacologically induced  
22 coma the cough reflex did not correlate with the GCS score, as n=4 of 12 patients (33%)  
23 with a GCS score =3 had an unimpaired cough reflex. On the other hand, 3 of 5 patients  
24 (60%) with a GCS score =8 had an impaired cough reflex [29]. These data are supported by  
25 the detection of a depressed gag reflex in drug-intoxicated patients even at a GCS score  $\geq 8$   
26 [30]. Of note, none of these studies has been performed in alcohol monointoxicated patients.  
27  
28

29  
30 In our study we could obtain information on the gag or cough reflex in n=74 patients. The  
31 absence of protective airway reflexes did significantly correlate with an increased risk of  
32 aspiration in a univariate analysis (Table 3). Furthermore, all airway measures significantly  
33 correlated with the rate of aspiration (Table 3). For instance, the necessity of secretion  
34 suction or intubation (on the discretion of the emergency physician) were each associated  
35 with an aspiration rate of >50%. Our data are in line with a smaller retrospective study on  
36 n=155 patients with mixed intoxication in which patients with reduced GCS scores or an  
37 impaired gag reflex had a higher risk for an aspiration pneumonitis [12]. An absent or  
38  
39  
40  
41  
42  
43  
44  
45  
46  
47  
48  
49  
50  
51  
52  
53  
54  
55  
56  
57  
58  
59  
60

1  
2  
3 reduced gag reflex was found in 96% of their patients with aspiration. However, the high  
4 aspiration rate of 15% in their cohort of mixed intoxication might be related to the application  
5 of gastric lavage and charcoal administration which is not applied in alcohol  
6 monointoxication. Our study impressively shows that the execution of some airway  
7 measures (e.g. oxygen supply) or encountered vomiting indicated only a low risk of  
8 aspiration, while other measures (e.g. mask ventilation, secretion suction, intubation) and the  
9 lack of protective airway reflexes indicate a high aspiration incidence in these patients. This  
10 would imply a thorough diagnostic (e.g. X-ray, bronchoscopy) or therapeutic (e.g. antibiotic  
11 treatment) work-up in these high-risk patients upon ICU admission. However, a GCS score  
12  $\leq 8$  alone should not warp the emergency physician into endotracheal intubation.  
13  
14  
15  
16  
17  
18  
19  
20  
21  
22  
23  
24

25 Although herewith we present - to the best of our knowledge - the most comprehensive  
26 analysis of the aspiration risk in alcohol monointoxicated patients, our study has some  
27 limitations. Due the retrospective nature of our study, we cannot provide direct clinical  
28 recommendations. Since protective airway reflexes were evaluated by the emergency team  
29 only in a subset of patients, there might be a bias towards reporting rather impaired than  
30 normal reflexes. However, since both preserved and impaired protective reflexes were listed  
31 as the reason against and in favor of intubation, respectively, we could not detect unilateral  
32 under- or over-reporting. Since we focused on severely alcohol-intoxicated patients admitted  
33 to the ICU of our hospital, our finding might not be extrapolated to the general population  
34 with alcohol monointoxication in an emergency department.  
35  
36  
37  
38  
39  
40  
41  
42  
43  
44  
45  
46  
47  
48  
49

## 50 **Conclusion**

51  
52 In our retrospective study, we found that the blood alcohol level did correlate with the  
53 patient's age but not with the GCS score. However, both age and GCS score did correlate  
54 with the risk of aspiration. A GCS score = 3 has a very low PPV for aspiration. We identified  
55  
56  
57  
58  
59  
60

1  
2  
3 risk factors for aspiration in alcohol monointoxicated patients: Guedel tube application, mask  
4 ventilation, loss of protective airway reflexes, secretion suction, intubation. These patients  
5 might benefit from an aggressive diagnostic and therapeutic workup. Since only 6% of  
6 patients with preserved gag reflexes had aspirated, in this patient subgroup the risk of  
7 intubation might prevail its benefits.  
8  
9  
10  
11  
12  
13  
14  
15  
16

17 **Acknowledgements:** The authors like to thank Dr. Thomas Koschny for assistance and  
18 support of graphic data representation.  
19  
20  
21  
22  
23  
24  
25

26 **Conflict of interests:** none  
27  
28  
29  
30  
31  
32  
33  
34  
35  
36  
37  
38  
39  
40  
41  
42  
43  
44  
45  
46  
47  
48  
49  
50  
51  
52  
53  
54  
55  
56  
57  
58  
59  
60



## Figure captions

**Figure 1.** Composition of the study cohort. From the initial cohort of 458 atraumatic patients with acute alcohol monointoxication, 47 admissions were excluded due to missing data or severe interfering medical conditions, resulting in 411 admissions eligible for the final analysis. In 3 cases 2 different exclusion criteria were present.

**Figure 2.** Blood alcohol levels at admission are plotted as a function of age, separately for n=294 admission of male (□) and n=117 admissions of female (◆) patients.

**Figure 3.** Correlation between the first GCS score at prehospital presentation and the second GCS score at hospital admission (n=336 complete data sets). The diagonal represents patients with no change in GCS score during their prehospital treatment. The number of patients is inscribed within each dot and reflected by the dot size. A change of  $\pm 2$  points between first and second GCS score was considered clinically irrelevant (unfilled circles). Patients with changes of their GCS score of 3 or more points are considered clinically relevant (filled circles).

**Figure 4.** Correlation between first GCS score and blood alcohol level for male (□) and female (◆) patients.

**Figure 5.** Distribution of the first GCS score (A) and age (B) for patients without aspiration versus proven aspiration, presented as box plots.

1  
2  
3  
4  
5  
6  
7  
8  
9  
10  
11  
12  
13  
14  
15  
16  
17  
18  
19  
20  
21  
22  
23  
24  
25  
26  
27  
28  
29  
30  
31  
32  
33  
34  
35  
36  
37  
38  
39  
40  
41  
42  
43  
44  
45  
46  
47  
48  
49  
50  
51  
52  
53  
54  
55  
56  
57  
58  
59  
60

**Ethics Statement**

The study was approved by the local ethics board of Heidelberg University (S-329/2013)

For peer review only

## References

1. Verelst S, Moonen PJ, Desruelles D *et al*. Emergency department visits due to alcohol intoxication: characteristics of patients and impact on the emergency room. *Alcohol Alcohol* 2012;**47**:433-8.
2. Pirmohamed M, Brown C, Owens L *et al*. The burden of alcohol misuse on an inner-city general hospital. *QJM* 2000;**93**:291-5.
3. Myran DT, Hsu AT, Smith G *et al*. Rates of emergency department visits attributable to alcohol use in Ontario from 2003 to 2016: a retrospective population-level study. *CMAJ* 2019;**191**:E804-E10.
4. Krumpke PE, Cummiskey JM, Lillington GA. Alcohol and the respiratory tract. *Med Clin North Am* 1984;**68**:201-19.
5. Vonghia L, Leggio L, Ferrulli A *et al*. Acute alcohol intoxication. *Eur J Intern Med* 2008;**19**:561-7.
6. Gentleman D, Dearden M, Midgley S *et al*. Guidelines for resuscitation and transfer of patients with serious head injury. *BMJ* 1993;**307**:547-52.
7. Duncan R, Thakore S. Decreased Glasgow Coma Scale score does not mandate endotracheal intubation in the emergency department. *J Emerg Med* 2009;**37**:451-5.
8. Sauter TC, Ronz K, Hirschi T *et al*. Intubation in acute alcohol intoxications at the emergency department. *Scand J Trauma Resusc Emerg Med* 2020;**28**:11.
9. Donald C, Duncan R, Thakore S. Predictors of the need for rapid sequence intubation in the poisoned patient with reduced Glasgow coma score. *Emerg Med J* 2009;**26**:510-2.
10. Bernhard M, Bein B, Böttiger BW *et al*. Handlungsempfehlung zur prähospitalen Notfallnarkose beim Erwachsenen. *Notfall + Rettungsmedizin* 2015;**18**:395-412.
11. Luckscheiter A, Lohs T, Fischer M *et al*. [Preclinical emergency anesthesia : A current state analysis from 2015-2017]. *Anaesthesist* 2019;**68**:270-81.
12. Eizadi-Mood N, Saghaei M, Alfred S *et al*. Comparative evaluation of Glasgow Coma Score and gag reflex in predicting aspiration pneumonitis in acute poisoning. *J Crit Care* 2009;**24**:470 e9-15.
13. Montassier E, Le Conte P. Aspiration pneumonia and severe self-poisoning: about the necessity of early airway management. *J Emerg Med* 2012;**43**:122-3.
14. Orso D, Vetrugno L, Federici N *et al*. Endotracheal intubation to reduce aspiration events in acutely comatose patients: a systematic review. *Scand J Trauma Resusc Emerg Med* 2020;**28**:116.
15. Driver BE, Klein LR, Schick AL *et al*. The occurrence of aspiration pneumonia after emergency endotracheal intubation. *Am J Emerg Med* 2018;**36**:193-6.
16. Zehtabchi S, Sinert R, Baron BJ *et al*. Does ethanol explain the acidosis commonly seen in ethanol-intoxicated patients? *Clin Toxicol (Phila)* 2005;**43**:161-6.
17. Tenenbein M. Do you really need that emergency drug screen? *Clin Toxicol (Phila)* 2009;**47**:286-91.
18. Hulse GK, Robertson SI, Tait RJ. Adolescent emergency department presentations with alcohol- or other drug-related problems in Perth, Western Australia. *Addiction* 2001;**96**:1059-67.
19. Romano E, Pollini RA. Patterns of drug use in fatal crashes. *Addiction* 2013;**108**:1428-38.
20. Mick I, Gross C, Lachnit A *et al*. Alcohol-induced impairment in adolescents admitted to inpatient treatment after heavy episodic drinking: effects of age and gender. *J Stud Alcohol Drugs* 2015;**76**:493-7.
21. Tonisson M, Tillmann V, Kuudeberg A *et al*. Plasma glucose, lactate, sodium, and potassium levels in children hospitalized with acute alcohol intoxication. *Alcohol* 2010;**44**:565-71.

- 1  
2  
3 22. Shavit I, Konopnicki M, Winkler K *et al.* Serum glucose and electrolyte levels in alcohol-  
4 intoxicated adolescents on admission to the emergency department: an unmatched case-  
5 control study. *Eur J Pediatr* 2012;**171**:1397-400.  
6  
7 23. Lien D, Mader TJ. Survival from profound alcohol-related lactic acidosis. *J Emerg Med*  
8 1999;**17**:841-6.  
9 24. Shahin H, Gopinath SP, Robertson CS. Influence of alcohol on early Glasgow Coma Scale in  
10 head-injured patients. *J Trauma* 2010;**69**:1176-81; discussion 81.  
11 25. Rundhaug NP, Moen KG, Skandsen T *et al.* Moderate and severe traumatic brain injury:  
12 effect of blood alcohol concentration on Glasgow Coma Scale score and relation to  
13 computed tomography findings. *J Neurosurg* 2015;**122**:211-8.  
14 26. Lange RT, Iverson GL, Brubacher JR *et al.* Effect of blood alcohol level on Glasgow Coma  
15 Scale scores following traumatic brain injury. *Brain Inj* 2010;**24**:919-27.  
16 27. Sperry JL, Gentilello LM, Minei JP *et al.* Waiting for the patient to "sober up": Effect of  
17 alcohol intoxication on glasgow coma scale score of brain injured patients. *J Trauma*  
18 2006;**61**:1305-11.  
19 28. Stuke L, Diaz-Arrastia R, Gentilello LM *et al.* Effect of alcohol on Glasgow Coma Scale in head-  
20 injured patients. *Ann Surg* 2007;**245**:651-5.  
21 29. Moulton C, Pennycook AG. Relation between Glasgow coma score and cough reflex. *Lancet*  
22 1994;**343**:1261-2.  
23 30. Moulton C, Pennycook A, Makower R. Relation between Glasgow coma scale and the gag  
24 reflex. *BMJ* 1991;**303**:1240-1.  
25 31. Adnet F, Baud F. Relation between Glasgow Coma Scale and aspiration pneumonia. *Lancet*  
26 1996;**348**:123-4.  
27 32. Vadeboncoeur TF, Davis DP, Ochs M *et al.* The ability of paramedics to predict aspiration in  
28 patients undergoing prehospital rapid sequence intubation. *J Emerg Med* 2006;**30**:131-6.  
29  
30  
31  
32  
33  
34  
35  
36  
37  
38  
39  
40  
41  
42  
43  
44  
45  
46  
47  
48  
49  
50  
51  
52  
53  
54  
55  
56  
57  
58  
59  
60

## Statements

a. Funding Statement: This research received no specific grant from any funding agency in the public, commercial or not-for-profit sectors.

b. Competing Interest: None declared.

c. Data Sharing Statement: Data may be obtained from a third party and are not publicly available

d. Contributorship Statement

MC, AH, EP, RK planned the study and performed the data acquisition. Statistical analysis was performed by TB. Manuscript writing and editing was performed by MC, AH, EP, TB, RK. The manuscript was submitted by MC.

e. Word count

3.694

1 **Figure 1**  
2  
3  
4



1 **Figure 2**  
 2  
 3  
 4  
 5  
 6  
 7  
 8  
 9

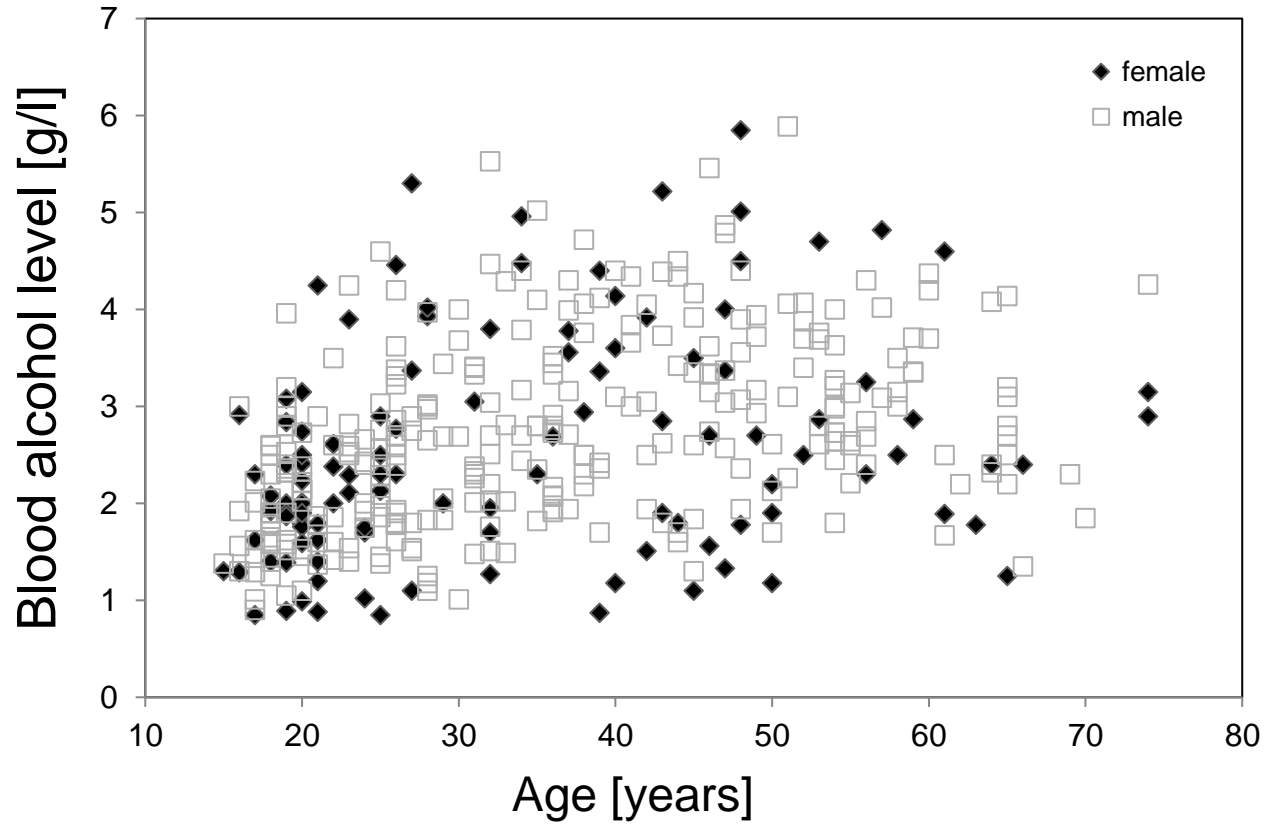

Figure 3

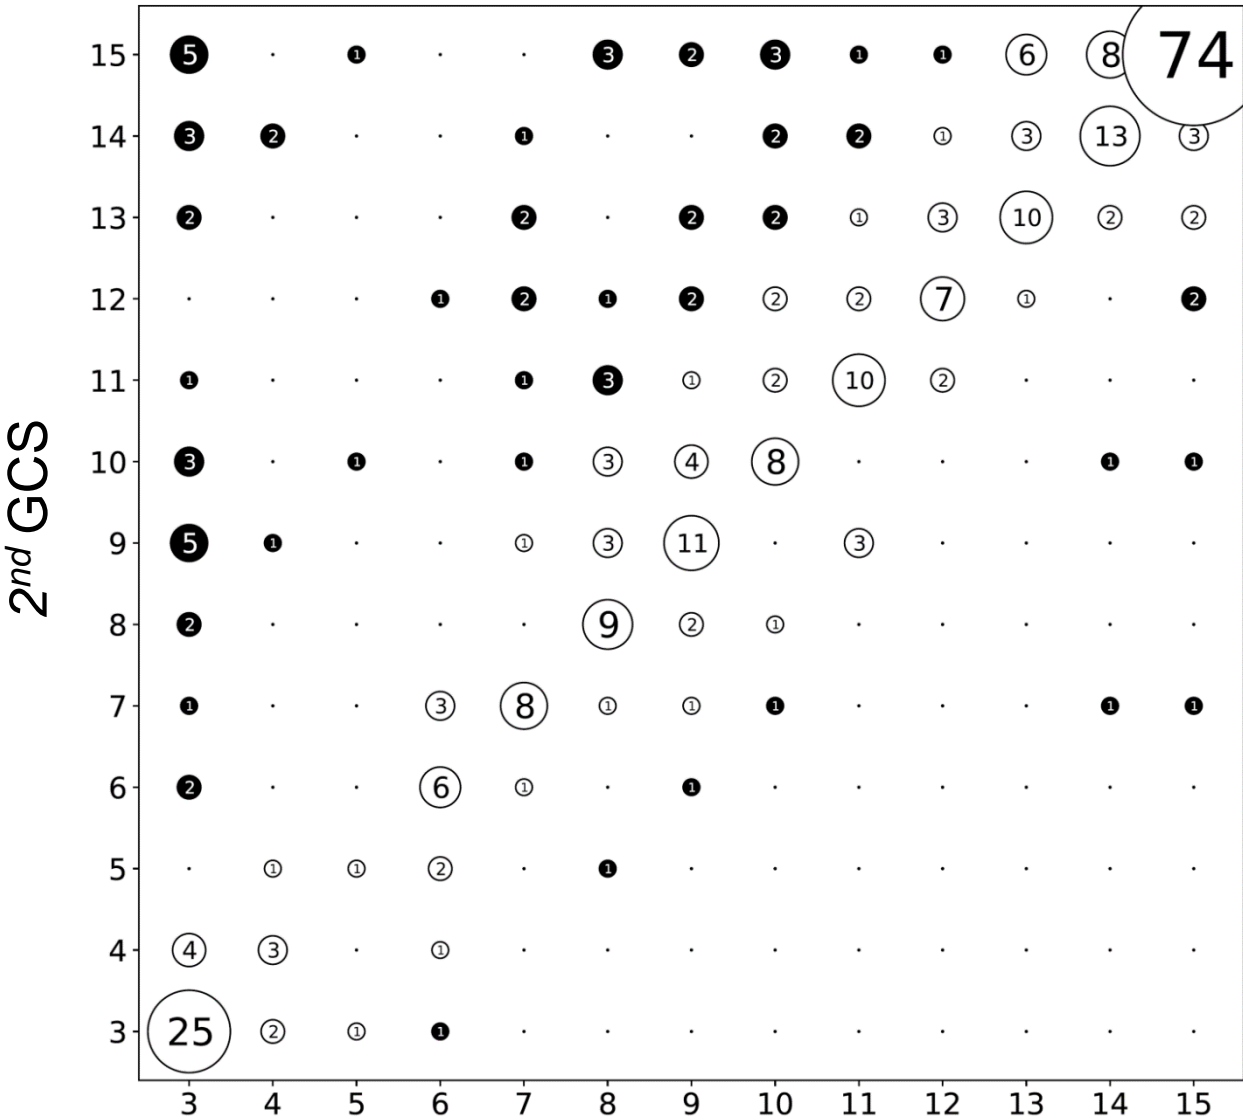

1  
2  
3  
4  
5  
6  
7  
8  
9  
10  
11  
12  
13  
14  
15  
16  
17  
18  
19  
20  
21  
22  
23  
24  
25  
26  
27  
28  
29  
30  
31  
32  
33  
34  
35  
36  
37  
38  
39  
40  
41



Figure 4



# Figure 5

1  
2  
3  
4  
5  
6  
7  
8  
9  
10  
11  
12  
13  
14  
15  
16  
17  
18  
19  
20  
21  
22  
23  
24  
25  
26  
27  
28  
29  
30  
31  
32  
33  
34  
35  
36  
37  
38  
39  
40  
41

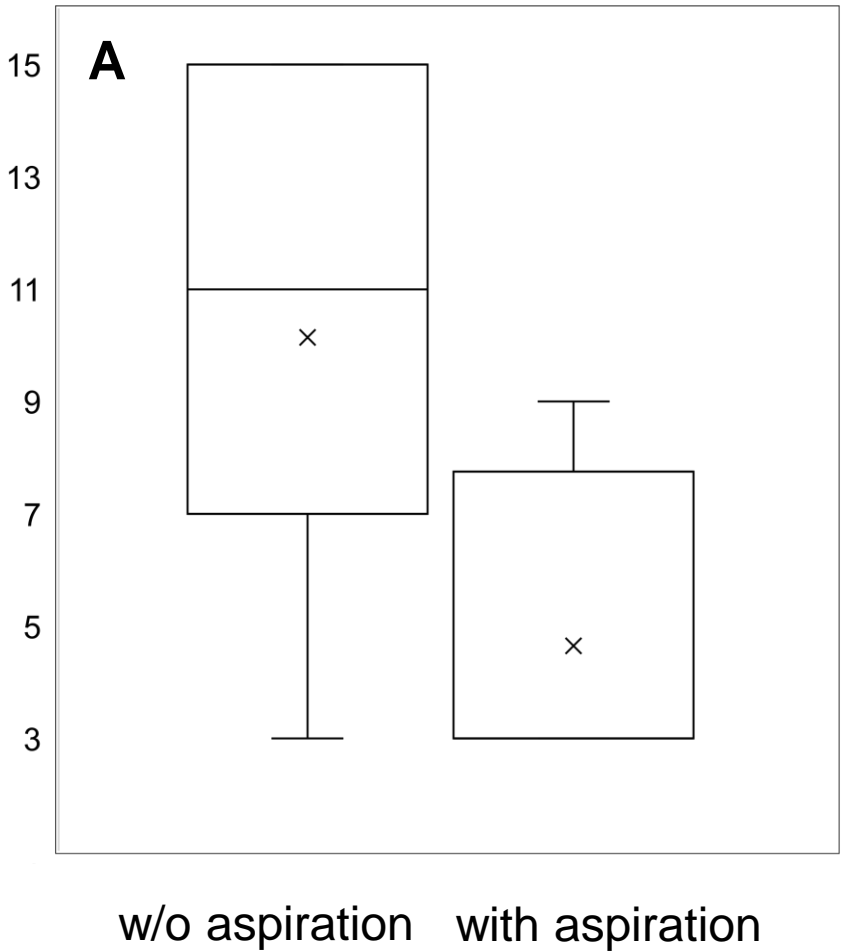

STROBE Statement—Checklist of items that should be included in reports of *cohort studies*

|                              | Item No | Recommendation                                                                                                                                                                                                                                                                                                         | Page No     |
|------------------------------|---------|------------------------------------------------------------------------------------------------------------------------------------------------------------------------------------------------------------------------------------------------------------------------------------------------------------------------|-------------|
| <b>Title and abstract</b>    | 1       | (a) Indicate the study's design with a commonly used term in the title or the abstract                                                                                                                                                                                                                                 | 1           |
|                              |         | (b) Provide in the abstract an informative and balanced summary of what was done and what was found                                                                                                                                                                                                                    | 2           |
| <b>Introduction</b>          |         |                                                                                                                                                                                                                                                                                                                        |             |
| Background/rationale         | 2       | Explain the scientific background and rationale for the investigation being reported                                                                                                                                                                                                                                   | 4           |
| Objectives                   | 3       | State specific objectives, including any prespecified hypotheses                                                                                                                                                                                                                                                       | 4           |
| <b>Methods</b>               |         |                                                                                                                                                                                                                                                                                                                        |             |
| Study design                 | 4       | Present key elements of study design early in the paper                                                                                                                                                                                                                                                                | 5           |
| Setting                      | 5       | Describe the setting, locations, and relevant dates, including periods of recruitment, exposure, follow-up, and data collection                                                                                                                                                                                        | 5           |
| Participants                 | 6       | (a) Give the eligibility criteria, and the sources and methods of selection of participants. Describe methods of follow-up<br>(b) For matched studies, give matching criteria and number of exposed and unexposed                                                                                                      | 5           |
| Variables                    | 7       | Clearly define all outcomes, exposures, predictors, potential confounders, and effect modifiers. Give diagnostic criteria, if applicable                                                                                                                                                                               | 5           |
| Data sources/<br>measurement | 8*      | For each variable of interest, give sources of data and details of methods of assessment (measurement). Describe comparability of assessment methods if there is more than one group                                                                                                                                   | 5           |
| Bias                         | 9       | Describe any efforts to address potential sources of bias                                                                                                                                                                                                                                                              | 9           |
| Study size                   | 10      | Explain how the study size was arrived at                                                                                                                                                                                                                                                                              | 5           |
| Quantitative variables       | 11      | Explain how quantitative variables were handled in the analyses. If applicable, describe which groupings were chosen and why                                                                                                                                                                                           | 6           |
| Statistical methods          | 12      | (a) Describe all statistical methods, including those used to control for confounding<br>(b) Describe any methods used to examine subgroups and interactions<br>(c) Explain how missing data were addressed<br>(d) If applicable, explain how loss to follow-up was addressed<br>(e) Describe any sensitivity analyses | 6<br>8<br>8 |
| <b>Results</b>               |         |                                                                                                                                                                                                                                                                                                                        |             |
| Participants                 | 13*     | (a) Report numbers of individuals at each stage of study—eg numbers potentially eligible, examined for eligibility, confirmed eligible, included in the study, completing follow-up, and analysed<br>(b) Give reasons for non-participation at each stage<br>(c) Consider use of a flow diagram                        | 8<br>9<br>8 |
| Descriptive data             | 14*     | (a) Give characteristics of study participants (eg demographic, clinical, social) and information on exposures and potential confounders<br>(b) Indicate number of participants with missing data for each variable of interest<br>(c) Summarise follow-up time (eg, average and total amount)                         | 8<br>8      |
| Outcome data                 | 15*     | Report numbers of outcome events or summary measures over time                                                                                                                                                                                                                                                         | 8-10        |

|    |                          |                                                                                                                  |                                                                                                                                                                                                              |       |
|----|--------------------------|------------------------------------------------------------------------------------------------------------------|--------------------------------------------------------------------------------------------------------------------------------------------------------------------------------------------------------------|-------|
| 1  | Main results             | 16                                                                                                               | (a) Give unadjusted estimates and, if applicable, confounder-adjusted estimates and their precision (eg, 95% confidence interval). Make clear which confounders were adjusted for and why they were included | 8-10  |
| 2  |                          | (b) Report category boundaries when continuous variables were categorized                                        |                                                                                                                                                                                                              |       |
| 3  |                          | (c) If relevant, consider translating estimates of relative risk into absolute risk for a meaningful time period |                                                                                                                                                                                                              |       |
| 4  | Other analyses           | 17                                                                                                               | Report other analyses done—eg analyses of subgroups and interactions, and sensitivity analyses                                                                                                               | 9     |
| 5  | <b>Discussion</b>        |                                                                                                                  |                                                                                                                                                                                                              |       |
| 6  | Key results              | 18                                                                                                               | Summarise key results with reference to study objectives                                                                                                                                                     | 15    |
| 7  | Limitations              | 19                                                                                                               | Discuss limitations of the study, taking into account sources of potential bias or imprecision. Discuss both direction and magnitude of any potential bias                                                   | 14    |
| 8  | Interpretation           | 20                                                                                                               | Give a cautious overall interpretation of results considering objectives, limitations, multiplicity of analyses, results from similar studies, and other relevant evidence                                   | 11-15 |
| 9  | Generalisability         | 21                                                                                                               | Discuss the generalisability (external validity) of the study results                                                                                                                                        | 14    |
| 10 | <b>Other information</b> |                                                                                                                  |                                                                                                                                                                                                              |       |
| 11 | Funding                  | 22                                                                                                               | Give the source of funding and the role of the funders for the present study and, if applicable, for the original study on which the present article is based                                                | 21    |

\*Give information separately for exposed and unexposed groups.

**Note:** An Explanation and Elaboration article discusses each checklist item and gives methodological background and published examples of transparent reporting. The STROBE checklist is best used in conjunction with this article (freely available on the Web sites of PLoS Medicine at <http://www.plosmedicine.org/>, Annals of Internal Medicine at <http://www.annals.org/>, and Epidemiology at <http://www.epidem.com/>). Information on the STROBE Initiative is available at <http://www.strobe-statement.org>.
